# Supplementary material for: It is all about the solvent: on the importance of the mobile phase for ZIC-HILIC glycopeptide enrichment
Source: PubMed Central journal article supplement (PMC5203826; doi:10.1007/s00216-016-0051-6), 2016-12-01
Supplement: 216_2016_51_MOESM2_ESM.pdf [file 216_2016_51_MOESM2_ESM.pdf]

---

**Table S6A** List of peptides identified in the glycopeptide enriched fraction as reported by MASCOT/ProteinScape search for IgG and A1PI

---

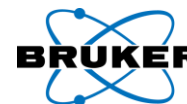

## Accumulated Protein Report

### Project Info

Name: Kathir Date: December 21, 2011

### Sample Info & Protocols

Name: ABC 2016 IgG And A1AT Date: August 8, 2016

### Search Type

Combined MS/MS - ProteinExtractor

### Search Result

Amazon Human\_SPJuly2013\_2016-08-08 18:23:29

### Search Location

/Kathir/ABC 2016 IgG And A1AT/KA A1AT ACN Drop 1min E1\_RA4\_01\_8263.d/

### Protein 1:

Serum albumin OS=Homo sapiens GN=ALB PE=1 SV=2

### Accession:

ALBU\_HUMAN

### Score:

2050.44

### Database:

SwissProt\_July2013

### MW [kDa]:

69.30

### Seq. Coverage [%]:

57.60 %

### pl:

5.88

### No. of Peptides:

31

### Modification(s):

Carbamidomethyl, Oxidation

| Cmpd. | No. of Cmpds. | m/z meas. | $\Delta$ m/z [ppm] | z | Rt [min] | Score | P | Range   | Sequence                           | Modification                         |
|-------|---------------|-----------|--------------------|---|----------|-------|---|---------|------------------------------------|--------------------------------------|
| 42    | 1             | 575.3120  | 35.44              | 2 | 14.4     | 64.2  | 1 | 25-34   | R.DAHKSEVAHR.F                     |                                      |
| 100   | 1             | 613.8740  | 110.41             | 2 | 19.6     | 75.5  | 1 | 35-44   | R.FKDLGEENFK.A                     |                                      |
| 131   | 1             | 575.3580  | 81.44              | 2 | 22.8     | 75.7  | 0 | 66-75   | K.LVNEVTEFAK.T                     |                                      |
| 58    | 1             | 749.8410  | 64.20              | 2 | 16.0     | 112.3 | 0 | 76-88   | K.TCVADESAENCDK.S                  | Carbamidomethyl: 2, 11               |
| 154   | 1             | 1137.9450 | 65.24              | 3 | 26.3     | 47.5  | 2 | 76-105  | K.TCVADESAENCDKSLHTLFGDKLCTVATLR.E | Carbamidomethyl: 2, 11, 24           |
| 74    | 2             | 725.8240  | 77.43              | 2 | 17.3     | 66.1  | 0 | 106-117 | R.ETYGEMADCCAK.Q                   | Carbamidomethyl: 9, 10; Oxidation: 6 |
| 66    | 1             | 572.3130  | 74.48              | 3 | 16.8     | 23.1  | 1 | 118-130 | K.QEPERNECFLQHK.D                  | Carbamidomethyl: 8                   |
| 97    | 1             | 879.4680  | 61.57              | 3 | 19.3     | 28.9  | 2 | 118-138 | K.QEPERNECFLQHKDDNPPLPR.L          | Carbamidomethyl: 8                   |
| 81    | 1             | 470.7590  | 66.32              | 2 | 17.9     | 49.3  | 0 | 131-138 | K.DDNPPLPR.L                       |                                      |
| 149   | 1             | 926.8780  | 93.69              | 3 | 25.9     | 34.5  | 1 | 139-161 | R.LVRPEVDVMCTAFHDNEETFLKK.Y        | Carbamidomethyl: 10                  |
| 104   | 1             | 528.3700  | 136.59             | 2 | 19.8     | 37.3  | 1 | 161-168 | K.KYLYEIAR.R                       |                                      |
| 124   | 1             | 464.3160  | 141.39             | 2 | 22.2     | 45.0  | 0 | 162-168 | K.YLYEIAR.R                        |                                      |
| 144   | 2             | 709.0550  | 76.61              | 3 | 24.5     | 62.4  | 1 | 187-205 | K.AAFTECCQAADKAACLLPK.L            | Carbamidomethyl: 6, 7, 15            |

# Accumulated Protein Report

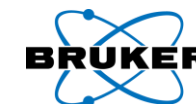

|     |   |           |        |   |      |       |   |         |                                  |                                   |
|-----|---|-----------|--------|---|------|-------|---|---------|----------------------------------|-----------------------------------|
| 57  | 1 | 506.9650  | 68.79  | 3 | 15.8 | 49.4  | 2 | 206-219 | K.LDELRLDEGKASSAK.Q              |                                   |
| 79  | 1 | 440.7520  | 63.13  | 2 | 17.7 | 55.9  | 0 | 250-257 | K.AEFAEVSK.L                     |                                   |
| 87  | 1 | 1043.9770 | 52.30  | 2 | 18.4 | 98.6  | 0 | 265-281 | K.VHTECCHGDLLECADDR.A            | Carbamidomethyl: 5, 6, 13         |
| 111 | 2 | 862.4470  | 80.67  | 3 | 20.6 | 70.8  | 1 | 265-286 | K.VHTECCHGDLLECADDRADLAK.Y       | Carbamidomethyl: 5, 6, 13         |
| 82  | 1 | 722.3770  | 72.47  | 2 | 18.0 | 85.9  | 0 | 287-298 | K.YICENQDSISSK.L                 | Carbamidomethyl: 3                |
| 67  | 1 | 773.9810  | 102.06 | 2 | 16.9 | 64.5  | 1 | 299-310 | K.LKECCEKPLLEK.S                 | Carbamidomethyl: 4, 5             |
| 172 | 2 | 997.5080  | 56.83  | 3 | 30.3 | 121.4 | 0 | 311-337 | K.SHCIAEVENDEMPADLPSLAADF VESK.D | Carbamidomethyl: 3; Oxidation: 12 |
| 175 | 1 | 992.1660  | 46.69  | 3 | 31.9 | 92.7  | 0 | 311-337 | K.SHCIAEVENDEMPADLPSLAADF VESK.D | Carbamidomethyl: 3                |
| 143 | 1 | 490.0230  | 143.82 | 3 | 24.5 | 70.3  | 1 | 361-372 | R.RHPDYSVLLLLR.L                 |                                   |
| 169 | 1 | 1023.1440 | 90.59  | 2 | 29.6 | 74.3  | 0 | 397-413 | K.VFDEFKPLVEEPQNLIK.Q            |                                   |
| 156 | 1 | 829.4610  | 97.71  | 2 | 26.9 | 93.9  | 0 | 414-426 | K.QNCELFEQLGEYK.F                | Carbamidomethyl: 3                |
| 128 | 1 | 480.8560  | 147.88 | 2 | 22.5 | 67.2  | 0 | 427-434 | K.FQNALLVR.Y                     |                                   |
| 129 | 1 | 820.5440  | 87.13  | 2 | 22.7 | 78.1  | 1 | 438-452 | K.KVPQVSTPTLVEVSR.N              |                                   |
| 48  | 1 | 501.8280  | 90.57  | 2 | 14.9 | 39.4  | 1 | 491-499 | K.TPVSDRVTK.C                    |                                   |
| 148 | 1 | 956.0290  | 62.27  | 2 | 25.2 | 72.6  | 0 | 509-524 | R.RPCFSALEVDETYVPK.E             | Carbamidomethyl: 3                |
| 108 | 1 | 564.9210  | 120.42 | 2 | 20.2 | 66.5  | 1 | 549-558 | K.KQTALVELVK.H                   |                                   |
| 140 | 1 | 500.8670  | 122.80 | 2 | 23.6 | 68.3  | 0 | 550-558 | K.QTALVELVK.H                    |                                   |
| 55  | 1 | 814.4130  | 56.42  | 2 | 15.7 | 59.0  | 2 | 585-598 | K.ADDKETCFEEGKK.L                | Carbamidomethyl: 7                |

**Protein 2:** Alpha-1-antitrypsin OS=Homo sapiens GN=SERPINA1 PE=1 SV=3  
**Accession:** A1AT\_HUMAN **Score:** 1648.77  
**Database:** SwissProt\_July2013 **MW [kDa]:** 46.70  
**Seq. Coverage [%]:** 47.80 % **pl:** 5.27  
**No. of Peptides:** 26

**Modification(s):** Carbamidomethyl, Oxidation, Deamidated

| Cmpd. | No. of Cmpds. | m/z meas. | $\Delta$ m/z [ppm] | z | Rt [min] | Score | P | Range   | Sequence                         | Modification   |
|-------|---------------|-----------|--------------------|---|----------|-------|---|---------|----------------------------------|----------------|
| 45    | 1             | 593.9510  | 39.47              | 3 | 14.7     | 56.9  | 0 | 35-49   | K.TDTSHHQDHPFNK.I                |                |
| 167   | 1             | 851.4680  | 69.41              | 4 | 29.1     | 49.0  | 1 | 35-63   | K.TDTSHHQDHPFNKITPNLAEF AFSLYR.Q |                |
| 176   | 1             | 1288.1800 | 10.77              | 2 | 32.0     | 124.0 | 0 | 126-149 | R.TLNQPDSQLQLTTGNGLFLSEGL K.L    | Deamidated: 15 |
| 135   | 1             | 603.4050  | 103.68             | 2 | 23.1     | 48.9  | 1 | 150-159 | K.LVDKFLEDVK.K                   |                |

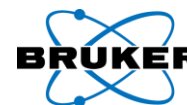

# Accumulated Protein Report

|     |   |           |        |   |      |       |   |         |                                   |                                     |
|-----|---|-----------|--------|---|------|-------|---|---------|-----------------------------------|-------------------------------------|
| 114 | 1 | 667.4640  | 110.99 | 2 | 20.9 | 64.8  | 2 | 150-160 | K.LVDKFLVDVKK.L                   |                                     |
| 64  | 1 | 568.8660  | 114.37 | 2 | 16.7 | 66.1  | 1 | 179-187 | K.KQINDYVEK.G                     |                                     |
| 62  | 1 | 804.4890  | 82.02  | 2 | 16.5 | 89.7  | 2 | 179-192 | K.KQINDYVEKGTQGK.I                |                                     |
| 83  | 1 | 504.8000  | 92.20  | 2 | 18.1 | 43.5  | 0 | 180-187 | K.QINDYVEK.G                      |                                     |
| 77  | 1 | 740.4070  | 42.50  | 2 | 17.6 | 33.9  | 1 | 180-192 | K.QINDYVEKGTQGK.I                 |                                     |
| 89  | 1 | 638.4040  | 91.09  | 2 | 18.6 | 42.6  | 1 | 216-225 | K.GKWERPFEVK.D                    |                                     |
| 139 | 1 | 787.9350  | 62.19  | 4 | 23.5 | 47.9  | 2 | 216-241 | K.GKWERPFEVKDTEEDFHVDQVT<br>TVK.V |                                     |
| 110 | 1 | 545.8610  | 134.41 | 2 | 20.4 | 34.5  | 0 | 218-225 | K.WERPFEVK.D                      |                                     |
| 133 | 1 | 946.5010  | 73.50  | 2 | 23.0 | 97.0  | 0 | 226-241 | K.DTEEDFHVDQVTTVK.V               |                                     |
| 141 | 1 | 837.4340  | 57.69  | 3 | 23.7 | 52.9  | 1 | 226-246 | K.DTEEDFHVDQVTTVKVPMMK.R          | Oxidation: 19, 20                   |
| 91  | 1 | 632.3580  | 88.13  | 2 | 18.7 | 37.3  | 0 | 248-257 | R.LGMFNIQHCK.K                    | Carbamidomethyl: 9; Oxidation:<br>3 |
| 72  | 1 | 464.6180  | 105.62 | 3 | 17.0 | 27.1  | 1 | 248-258 | R.LGMFNIQHCKK.L                   | Carbamidomethyl: 9; Oxidation:<br>3 |
| 126 | 1 | 602.0520  | 100.50 | 3 | 22.5 | 52.3  | 0 | 284-298 | K.LQHLENELTHDITK.F                |                                     |
| 61  | 1 | 539.7930  | 47.36  | 2 | 16.3 | 29.6  | 1 | 299-306 | K.FLENEDRR.S                      |                                     |
| 76  | 1 | 426.7610  | 24.54  | 2 | 17.5 | 58.5  | 0 | 307-314 | R.SASLHLPK.L                      |                                     |
| 142 | 1 | 555.8730  | 121.09 | 2 | 24.1 | 85.3  | 0 | 315-324 | K.LSITGTYDLK.S                    |                                     |
| 147 | 1 | 508.3700  | 116.17 | 2 | 25.1 | 81.8  | 0 | 325-334 | K.SVLGQLGITK.V                    |                                     |
| 155 | 2 | 918.0180  | 66.36  | 2 | 26.9 | 133.2 | 0 | 335-352 | K.VFSNGADLSGVTEEAPLK.L            | Deamidated: 4                       |
| 150 | 3 | 917.5370  | 78.39  | 2 | 26.1 | 97.3  | 0 | 335-352 | K.VFSNGADLSGVTEEAPLK.L            |                                     |
| 151 | 2 | 1081.6680 | 90.05  | 2 | 26.2 | 92.0  | 1 | 335-355 | K.VFSNGADLSGVTEEAPLKLSK.A         |                                     |
| 159 | 1 | 721.7740  | 87.52  | 3 | 27.4 | 54.9  | 1 | 335-355 | K.VFSNGADLSGVTEEAPLKLSK.A         | Deamidated: 4                       |
| 105 | 1 | 444.8000  | 100.11 | 2 | 19.9 | 47.9  | 0 | 360-367 | K.AVLTIDEK.G                      |                                     |

**Protein 3:** Haptoglobin OS=Homo sapiens GN=HP PE=1 SV=1  
**Accession:** HPT\_HUMAN **Score:** 54.73  
**Database:** SwissProt\_July2013 **MW [kDa]:** 45.20  
**Seq. Coverage [%]:** 2.70 % **pI:** 6.13  
**No. of Peptides:** 1

| Cmpd. | No. of Cmpds. | m/z meas. | $\Delta$ m/z [ppm] | z | Rt [min] | Score | P | Range   | Sequence        | Modification |
|-------|---------------|-----------|--------------------|---|----------|-------|---|---------|-----------------|--------------|
| 44    | 1             | 637.8980  | 118.51             | 2 | 14.6     | 54.7  | 1 | 312-322 | R.HYEGSTVPEKK.T |              |



## Accumulated Protein Report

**Search Type** Combined MS/MS - ProteinExtractor  
**Search Result** Amazon Human\_SPJuly2013\_2016-08-08 18:23:29  
**Search Location** /Kathir/ABC 2016 IgG And A1AT/KA A1AT ACN Drop 1min E1\_RA4\_01\_8296.d/

**Protein 1:** Serum albumin OS=Homo sapiens GN=ALB PE=1 SV=2  
**Accession:** ALBU\_HUMAN **Score:** 1764.01  
**Database:** SwissProt\_July2013 **MW [kDa]:** 69.30  
**Seq. Coverage [%]:** 47.80 % **pI:** 5.88  
**No. of Peptides:** 28

**Modification(s):** Carbamidomethyl, Oxidation

| Cmpd. | No. of Cmpds. | m/z meas. | $\Delta$ m/z [ppm] | z | Rt [min] | Score | P | Range   | Sequence                   | Modification                            |
|-------|---------------|-----------|--------------------|---|----------|-------|---|---------|----------------------------|-----------------------------------------|
| 6     | 1             | 575.3810  | 155.38             | 2 | 14.3     | 59.0  | 1 | 25-34   | R.DAHKSEVAHR.F             |                                         |
| 63    | 1             | 613.8800  | 120.19             | 2 | 19.7     | 75.3  | 1 | 35-44   | R.FKDLGEENFK.A             |                                         |
| 96    | 1             | 575.3670  | 97.08              | 2 | 22.9     | 69.1  | 0 | 66-75   | K.LVNEVTEFAK.T             |                                         |
| 21    | 1             | 749.8530  | 80.21              | 2 | 16.1     | 112.3 | 0 | 76-88   | K.TCVADESAENCDK.S          | Carbamidomethyl: 2, 11                  |
| 38    | 1             | 725.8200  | 71.92              | 2 | 17.4     | 66.0  | 0 | 106-117 | R.ETYGEMADCCAK.Q           | Carbamidomethyl: 9, 10;<br>Oxidation: 6 |
| 30    | 1             | 572.3270  | 98.94              | 3 | 16.9     | 32.8  | 1 | 118-130 | K.QEPERNECFLQHK.D          | Carbamidomethyl: 8                      |
| 67    | 1             | 659.8490  | 55.75              | 4 | 19.9     | 24.9  | 2 | 118-138 | K.QEPERNECFLQHKDDNPPLPR.L  | Carbamidomethyl: 8                      |
| 46    | 1             | 470.7630  | 74.82              | 2 | 18.0     | 45.8  | 0 | 131-138 | K.DDNPPLPR.L               |                                         |
| 66    | 1             | 528.3730  | 142.26             | 2 | 19.8     | 34.1  | 1 | 161-168 | K.KYLYEIAR.R               |                                         |
| 88    | 1             | 464.3160  | 141.39             | 2 | 22.2     | 48.0  | 0 | 162-168 | K.YLYEIAR.R                |                                         |
| 108   | 1             | 709.0940  | 131.62             | 3 | 24.6     | 70.0  | 1 | 187-205 | K.AAFTECCQAADKAACLLPK.L    | Carbamidomethyl: 6, 7, 15               |
| 20    | 1             | 759.9550  | 83.50              | 2 | 15.9     | 53.6  | 2 | 206-219 | K.LDEL RDEGKASSAK.Q        |                                         |
| 45    | 1             | 440.7670  | 97.17              | 2 | 17.9     | 52.4  | 0 | 250-257 | K.AEFAEVSK.L               |                                         |
| 53    | 1             | 696.3270  | 61.71              | 3 | 18.5     | 72.1  | 0 | 265-281 | K.VHTECCHGDLLECADDR.A      | Carbamidomethyl: 5, 6, 13               |
| 70    | 1             | 862.4390  | 71.40              | 3 | 20.2     | 61.3  | 1 | 265-286 | K.VHTECCHGDLLECADDRADLAK.Y | Carbamidomethyl: 5, 6, 13               |
| 47    | 1             | 722.3820  | 79.39              | 2 | 18.2     | 82.0  | 0 | 287-298 | K.YICENQDSISSK.L           | Carbamidomethyl: 3                      |
| 32    | 1             | 773.9990  | 125.31             | 2 | 17.0     | 52.1  | 1 | 299-310 | K.LKECCEKPLLEK.S           | Carbamidomethyl: 4, 5                   |
| 161   | 1             | 997.5360  | 84.90              | 3 | 30.5     | 115.0 | 0 | 311-337 | K.SHCIAEVENDEMPADLPSLAADF  | Carbamidomethyl: 3; Oxidation:          |

# Accumulated Protein Report

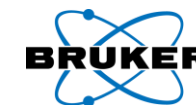

|     |   |          |        |   |      |       |   |         | VESK.D               | 12                 |
|-----|---|----------|--------|---|------|-------|---|---------|----------------------|--------------------|
| 41  | 1 | 492.7830 | 71.34  | 2 | 17.7 | 45.0  | 0 | 376-383 | K.TYETTLEK.C         |                    |
| 124 | 2 | 829.5100 | 156.79 | 2 | 27.0 | 106.0 | 0 | 414-426 | K.QNCELFEQLGEYK.F    | Carbamidomethyl: 3 |
| 93  | 1 | 480.8680 | 172.84 | 2 | 22.6 | 67.3  | 0 | 427-434 | K.FQNALLVR.Y         |                    |
| 94  | 1 | 547.3760 | 107.01 | 3 | 22.7 | 94.0  | 1 | 438-452 | K.KVPQVSTPTLVEVSR.N  |                    |
| 11  | 1 | 501.8460 | 126.44 | 2 | 15.1 | 38.5  | 1 | 491-499 | K.TPVSDRVTK.C        |                    |
| 112 | 1 | 637.7330 | 132.14 | 3 | 25.3 | 62.8  | 0 | 509-524 | R.RPCFSALEVDETYVPK.E | Carbamidomethyl: 3 |
| 73  | 1 | 564.9240 | 125.73 | 2 | 20.3 | 63.1  | 1 | 549-558 | K.KQTALVELVK.H       |                    |
| 105 | 1 | 500.8930 | 174.72 | 2 | 23.7 | 48.7  | 0 | 550-558 | K.QTALVELVK.H        |                    |
| 28  | 1 | 750.3750 | 73.87  | 2 | 16.8 | 60.7  | 1 | 585-597 | K.ADDKETCFEEGK.K     | Carbamidomethyl: 7 |
| 18  | 1 | 814.4230 | 68.70  | 2 | 15.8 | 52.3  | 2 | 585-598 | K.ADDKETCFEEGKK.L    | Carbamidomethyl: 7 |

**Protein 2:** Alpha-1-antitrypsin OS=Homo sapiens GN=SERPINA1 PE=1 SV=3

**Accession:** A1AT\_HUMAN  
**Database:** SwissProt\_July2013  
**Seq. Coverage [%]:** 37.30 %

**Score:** 1293.34  
**MW [kDa]:** 46.70  
**pI:** 5.27  
**No. of Peptides:** 20

**Modification(s):** Carbamidomethyl, Oxidation, Deamidated

| Cmpd. | No. of Cmpds. | m/z meas. | $\Delta$ m/z [ppm] | z | Rt [min] | Score | P | Range   | Sequence            | Modification                     |
|-------|---------------|-----------|--------------------|---|----------|-------|---|---------|---------------------|----------------------------------|
| 15    | 1             | 890.4660  | 87.94              | 2 | 15.6     | 83.6  | 0 | 35-49   | K.TDTSHHQDHPTFNK.I  |                                  |
| 98    | 1             | 603.4220  | 131.86             | 2 | 23.1     | 48.7  | 1 | 150-159 | K.LVDKFLEDVK.K      |                                  |
| 77    | 1             | 667.4760  | 128.97             | 2 | 20.9     | 71.4  | 2 | 150-160 | K.LVDKFLEDVKK.L     |                                  |
| 27    | 1             | 568.8710  | 123.16             | 2 | 16.8     | 66.0  | 1 | 179-187 | K.KQINDYVEK.G       |                                  |
| 26    | 1             | 536.6640  | 86.15              | 3 | 16.6     | 57.0  | 2 | 179-192 | K.KQINDYVEKGTQGK.I  |                                  |
| 48    | 1             | 504.8090  | 110.03             | 2 | 18.2     | 41.6  | 0 | 180-187 | K.QINDYVEK.G        |                                  |
| 43    | 1             | 740.4280  | 70.86              | 2 | 17.7     | 52.5  | 1 | 180-192 | K.QINDYVEKGTQGK.I   |                                  |
| 55    | 1             | 638.4150  | 108.32             | 2 | 18.7     | 42.2  | 1 | 216-225 | K.GKWERPFEVK.D      |                                  |
| 74    | 1             | 545.8500  | 114.25             | 2 | 20.4     | 34.3  | 0 | 218-225 | K.WERPFEVK.D        |                                  |
| 99    | 1             | 946.5090  | 81.96              | 2 | 23.1     | 101.1 | 0 | 226-241 | K.DTEEDFHVDQVTTVK.V |                                  |
| 56    | 1             | 632.3790  | 121.34             | 2 | 18.9     | 43.6  | 0 | 248-257 | R.LGMFNIHQCK.K      | Carbamidomethyl: 9; Oxidation: 3 |
| 92    | 1             | 602.0500  | 97.18              | 3 | 22.6     | 48.6  | 0 | 284-298 | K.LQHLENELTHDITK.F  |                                  |
| 24    | 1             | 539.7920  | 45.51              | 2 | 16.4     | 33.9  | 1 | 299-306 | K.FLENEDRR.S        |                                  |



## Accumulated Protein Report

|     |   |          |        |   |      |       |   |         |                           |               |
|-----|---|----------|--------|---|------|-------|---|---------|---------------------------|---------------|
| 40  | 1 | 426.7630 | 29.23  | 2 | 17.6 | 52.2  | 0 | 307-314 | R.SASLHLPK.L              |               |
| 106 | 1 | 555.8870 | 146.28 | 2 | 24.2 | 81.2  | 0 | 315-324 | K.LSITGTYDLK.S            |               |
| 110 | 1 | 508.3980 | 171.26 | 2 | 25.1 | 76.9  | 0 | 325-334 | K.SVLGQLGITK.V            |               |
| 132 | 2 | 918.0660 | 118.65 | 2 | 27.7 | 129.1 | 0 | 335-352 | K.VFSNGADLSGVTEEAPLK.L    | Deamidated: 4 |
| 116 | 3 | 917.5700 | 114.36 | 2 | 26.2 | 118.1 | 0 | 335-352 | K.VFSNGADLSGVTEEAPLK.L    |               |
| 133 | 1 | 721.8100 | 137.40 | 3 | 27.8 | 30.0  | 1 | 335-355 | K.VFSNGADLSGVTEEAPLKLSK.A | Deamidated: 4 |
| 68  | 1 | 444.8050 | 111.35 | 2 | 20.0 | 62.9  | 0 | 360-367 | K.AVLTIDEK.G              |               |

**Protein 3:** Haptoglobin OS=Homo sapiens GN=HP PE=1 SV=1  
**Accession:** HPT\_HUMAN **Score:** 57.24  
**Database:** SwissProt\_July2013 **MW [kDa]:** 45.20  
**Seq. Coverage [%]:** 2.70 % **pl:** 6.13  
**No. of Peptides:** 1

| Cmpd. | No. of Cmpds. | m/z meas. | $\Delta$ m/z [ppm] | z | Rt [min] | Score | P | Range   | Sequence        | Modification |
|-------|---------------|-----------|--------------------|---|----------|-------|---|---------|-----------------|--------------|
| 8     | 1             | 637.9170  | 148.30             | 2 | 14.6     | 57.2  | 1 | 312-322 | R.HYEGSTVPEKK.T |              |

**Search Type:** Combined MS/MS - ProteinExtractor  
**Search Result:** Amazon Human\_SPJuly2013\_2016-08-08 18:23:29  
**Search Location:** /Kathir/ABC 2016 IgG And A1AT/KA A1AT EtOH Drop 1min E1\_RD4\_01\_8281.d/

**Protein 1:** Serum albumin OS=Homo sapiens GN=ALB PE=1 SV=2  
**Accession:** ALBU\_HUMAN **Score:** 1932.74  
**Database:** SwissProt\_July2013 **MW [kDa]:** 69.30  
**Seq. Coverage [%]:** 48.60 % **pl:** 5.88  
**No. of Peptides:** 28

**Modification(s):** Carbamidomethyl, Oxidation

| Cmpd. | No. of Cmpds. | m/z meas. | $\Delta$ m/z [ppm] | z | Rt [min] | Score | P | Range | Sequence       | Modification |
|-------|---------------|-----------|--------------------|---|----------|-------|---|-------|----------------|--------------|
| 26    | 1             | 575.3480  | 98.02              | 2 | 14.4     | 59.0  | 1 | 25-34 | R.DAHKSEVAHR.F |              |

# Accumulated Protein Report



|     |   |           |        |   |      |       |   |         |                                     |                                         |
|-----|---|-----------|--------|---|------|-------|---|---------|-------------------------------------|-----------------------------------------|
| 86  | 2 | 613.8570  | 82.72  | 2 | 19.7 | 75.5  | 1 | 35-44   | R.FKDLGEENFK.A                      |                                         |
| 116 | 1 | 575.3740  | 109.25 | 2 | 22.8 | 75.1  | 0 | 66-75   | K.LVNEVTEFAK.T                      |                                         |
| 47  | 1 | 749.8350  | 56.20  | 2 | 16.0 | 107.2 | 0 | 76-88   | K.TCVADESAENCDK.S                   | Carbamidomethyl: 2, 11                  |
| 63  | 1 | 725.8160  | 66.41  | 2 | 17.4 | 56.6  | 0 | 106-117 | R.ETYGEMADCCAK.Q                    | Carbamidomethyl: 9, 10;<br>Oxidation: 6 |
| 84  | 2 | 879.4530  | 44.51  | 3 | 19.4 | 22.6  | 2 | 118-138 | K.QEPERNECFLQHKDDPNLPR.L            | Carbamidomethyl: 8                      |
| 71  | 1 | 470.7900  | 132.18 | 2 | 18.0 | 54.5  | 0 | 131-138 | K.DDNPDLPR.L                        |                                         |
| 89  | 1 | 528.3520  | 102.51 | 2 | 19.8 | 51.8  | 1 | 161-168 | K.KYLYEIAR.R                        |                                         |
| 108 | 1 | 464.3110  | 130.62 | 2 | 22.1 | 45.0  | 0 | 162-168 | K.YLYEIAR.R                         |                                         |
| 45  | 1 | 759.9480  | 74.28  | 2 | 15.9 | 60.9  | 2 | 206-219 | K.LDELDRDEGKASSAK.Q                 |                                         |
| 77  | 1 | 1043.9700 | 45.59  | 2 | 18.5 | 86.9  | 0 | 265-281 | K.VHTECCHGDLLECADDR.A               | Carbamidomethyl: 5, 6, 13               |
| 92  | 1 | 862.4300  | 60.96  | 3 | 20.2 | 59.8  | 1 | 265-286 | K.VHTECCHGDLLECADDRDLAK.Y           | Carbamidomethyl: 5, 6, 13               |
| 72  | 1 | 722.3640  | 54.47  | 2 | 18.2 | 93.5  | 0 | 287-298 | K.YICENQDSISSK.L                    | Carbamidomethyl: 3                      |
| 59  | 1 | 773.9810  | 102.06 | 2 | 17.0 | 62.0  | 1 | 299-310 | K.LKECCEKPLEK.S                     | Carbamidomethyl: 4, 5                   |
| 189 | 4 | 997.5460  | 94.93  | 3 | 30.5 | 128.0 | 0 | 311-337 | K.SHCIAEVENDEMPADLPSLAADF<br>VESK.D | Carbamidomethyl: 3; Oxidation:<br>12    |
| 196 | 1 | 992.2020  | 82.98  | 3 | 32.0 | 109.2 | 0 | 311-337 | K.SHCIAEVENDEMPADLPSLAADF<br>VESK.D | Carbamidomethyl: 3                      |
| 42  | 1 | 599.3170  | 58.30  | 2 | 15.7 | 46.7  | 1 | 338-347 | K.DVCKNYAEAK.D                      | Carbamidomethyl: 3                      |
| 131 | 1 | 490.0520  | 203.00 | 3 | 24.6 | 73.0  | 1 | 361-372 | R.RHPDYSVLLLLR.L                    |                                         |
| 184 | 1 | 682.4560  | 126.07 | 3 | 29.6 | 63.0  | 0 | 397-413 | K.VFDEFKPLVEEPQNLIK.Q               |                                         |
| 154 | 1 | 829.4770  | 117.00 | 2 | 27.0 | 97.1  | 0 | 414-426 | K.QNCELFEQLGEYK.F                   | Carbamidomethyl: 3                      |
| 115 | 1 | 820.5470  | 90.79  | 2 | 22.7 | 71.3  | 1 | 438-452 | K.KVPQVSTPTLVEVSR.N                 |                                         |
| 32  | 1 | 501.8200  | 74.62  | 2 | 15.0 | 33.9  | 1 | 491-499 | K.TPVSDRVTK.C                       |                                         |
| 65  | 1 | 569.7810  | 49.82  | 2 | 17.7 | 46.4  | 0 | 500-508 | K.CCTESLVNR.R                       | Carbamidomethyl: 1, 2                   |
| 135 | 1 | 637.7220  | 114.89 | 3 | 25.3 | 85.6  | 0 | 509-524 | R.RPCFSALEVDETYVPK.E                | Carbamidomethyl: 3                      |
| 93  | 1 | 564.9120  | 104.49 | 2 | 20.2 | 66.6  | 1 | 549-558 | K.KQTALVELVK.H                      |                                         |
| 123 | 1 | 500.8900  | 168.73 | 2 | 23.6 | 54.1  | 0 | 550-558 | K.QTALVELVK.H                       |                                         |
| 56  | 1 | 750.3840  | 85.87  | 2 | 16.8 | 69.5  | 1 | 585-597 | K.ADDKETCFAEEGK.K                   | Carbamidomethyl: 7                      |
| 44  | 1 | 814.4130  | 56.42  | 2 | 15.8 | 59.7  | 2 | 585-598 | K.ADDKETCFAEEGK.L                   | Carbamidomethyl: 7                      |

Protein 2: Alpha-1-antitrypsin OS=Homo sapiens GN=SERPINA1 PE=1 SV=3

Accession: A1AT\_HUMAN

Database: SwissProt\_July2013

Seq. Coverage [%]: 42.10 %

Score: 1571.51

MW [kDa]: 46.70

pI: 5.27

No. of Peptides: 24



# Accumulated Protein Report



Modification(s): Carbamidomethyl, Oxidation, Deamidated

| Cmpd. | No. of Cmpds. | m/z meas. | $\Delta$ m/z [ppm] | z | Rt [min] | Score | P | Range   | Sequence                            | Modification                         |
|-------|---------------|-----------|--------------------|---|----------|-------|---|---------|-------------------------------------|--------------------------------------|
| 30    | 4             | 890.5040  | 130.62             | 2 | 14.8     | 80.0  | 0 | 35-49   | K.TDTSHHQDHPFNK.I                   |                                      |
| 98    | 1             | 667.4590  | 103.50             | 2 | 20.9     | 68.2  | 2 | 150-160 | K.LVDKFLEDVKK.L                     |                                      |
| 101   | 1             | 772.1100  | 77.91              | 3 | 21.1     | 95.7  | 2 | 160-179 | K.KLYHSEAFVNFQDTEEAKK.Q             |                                      |
| 132   | 1             | 686.7160  | 91.44              | 3 | 24.7     | 63.1  | 0 | 161-178 | K.LYHSEAFVNFQDTEEAK.K               |                                      |
| 113   | 1             | 729.3970  | 62.34              | 3 | 22.6     | 65.8  | 1 | 161-179 | K.LYHSEAFVNFQDTEEAKK.Q              |                                      |
| 54    | 1             | 568.8610  | 105.58             | 2 | 16.8     | 73.1  | 1 | 179-187 | K.KQINDYVEK.G                       |                                      |
| 53    | 1             | 536.6670  | 91.74              | 3 | 16.6     | 60.1  | 2 | 179-192 | K.KQINDYVEKGTQGK.I                  |                                      |
| 73    | 1             | 504.7990  | 90.21              | 2 | 18.2     | 40.8  | 0 | 180-187 | K.QINDYVEK.G                        |                                      |
| 66    | 1             | 740.4200  | 60.05              | 2 | 17.7     | 40.8  | 1 | 180-192 | K.QINDYVEKGTQGK.I                   |                                      |
| 79    | 1             | 638.3690  | 36.26              | 2 | 18.7     | 44.1  | 1 | 216-225 | K.GKWERPFEVK.D                      |                                      |
| 126   | 1             | 1050.5680 | 58.15              | 3 | 23.8     | 105.1 | 2 | 216-241 | K.GKWERPFEVKDTEEEEDFHVDQVT<br>TVK.V | Deamidated: 21                       |
| 94    | 1             | 545.8570  | 127.08             | 2 | 20.4     | 34.4  | 0 | 218-225 | K.WERPFEVK.D                        |                                      |
| 119   | 1             | 946.5080  | 80.90              | 2 | 23.1     | 81.0  | 0 | 226-241 | K.DTEEEEDFHVDQVTTVK.V               |                                      |
| 69    | 1             | 473.9460  | 87.97              | 3 | 17.8     | 22.0  | 1 | 247-257 | K.RLGMFNIQHCK.K                     | Carbamidomethyl: 10;<br>Oxidation: 4 |
| 61    | 1             | 464.6120  | 92.71              | 3 | 17.1     | 31.0  | 1 | 248-258 | R.LGMFNIQHCKK.L                     | Carbamidomethyl: 9; Oxidation:<br>3  |
| 111   | 1             | 902.5710  | 96.84              | 2 | 22.6     | 100.3 | 0 | 284-298 | K.LQHLENELTHDITK.F                  |                                      |
| 50    | 1             | 539.8000  | 60.33              | 2 | 16.4     | 31.5  | 1 | 299-306 | K.FLENEDRR.S                        |                                      |
| 64    | 1             | 426.7750  | 57.35              | 2 | 17.6     | 48.8  | 0 | 307-314 | R.SASLHLPK.L                        |                                      |
| 129   | 1             | 555.9000  | 169.67             | 2 | 24.2     | 83.2  | 0 | 315-324 | K.LSITGTDLK.S                       |                                      |
| 134   | 1             | 508.4000  | 175.19             | 2 | 25.1     | 81.8  | 0 | 325-334 | K.SVLGQLGITK.V                      |                                      |
| 163   | 1             | 918.0490  | 100.13             | 2 | 27.6     | 118.7 | 0 | 335-352 | K.VFSNGADLSGVTEEAPLK.L              | Deamidated: 4                        |
| 141   | 2             | 917.5580  | 101.28             | 2 | 26.2     | 93.8  | 0 | 335-352 | K.VFSNGADLSGVTEEAPLK.L              |                                      |
| 160   | 2             | 1082.1440 | 75.21              | 2 | 27.4     | 61.1  | 1 | 335-355 | K.VFSNGADLSGVTEEAPLKLSK.A           | Deamidated: 4                        |
| 90    | 1             | 444.8030  | 106.86             | 2 | 20.0     | 46.9  | 0 | 360-367 | K.AVLTIDEK.G                        |                                      |

Protein 3: Haptoglobin OS=Homo sapiens GN=HP PE=1 SV=1

Accession: HPT\_HUMAN  
Database: SwissProt\_July2013

Score: 118.07  
MW [kDa]: 45.20



## Accumulated Protein Report

Seq. Coverage [%]: 4.90 %

pl: 6.13  
No. of Peptides: 2

| Cmpd. | No. of Cmpds. | m/z meas. | $\Delta$ m/z [ppm] | z | Rt [min] | Score | P | Range   | Sequence        | Modification |
|-------|---------------|-----------|--------------------|---|----------|-------|---|---------|-----------------|--------------|
| 107   | 1             | 490.7980  | 95.65              | 2 | 21.9     | 58.1  | 0 | 278-286 | R.VGYVSGWGR.N   |              |
| 28    | 1             | 637.8900  | 105.97             | 2 | 14.6     | 59.9  | 1 | 312-322 | R.HYEGSTVPEKK.T |              |

### Search Type Search Result Search Location

Combined MS/MS - ProteinExtractor  
Amazon Human\_SPJuly2013\_2016-08-08 18:23:29  
/Kathir/ABC 2016 IgG And A1AT/KA A1AT ACN Drop 1min E2\_RA5\_01\_8252.d/

Protein 1: Serum albumin OS=Homo sapiens GN=ALB PE=1 SV=2  
Accession: ALBU\_HUMAN Score: 1960.71  
Database: SwissProt\_July2013 MW [kDa]: 69.30  
Seq. Coverage [%]: 54.40 % pl: 5.88  
No. of Peptides: 28

Modification(s): Carbamidomethyl, Oxidation

| Cmpd. | No. of Cmpds. | m/z meas. | $\Delta$ m/z [ppm] | z | Rt [min] | Score | P | Range   | Sequence                           | Modification               |
|-------|---------------|-----------|--------------------|---|----------|-------|---|---------|------------------------------------|----------------------------|
| 21    | 1             | 575.3230  | 54.56              | 2 | 14.4     | 62.5  | 1 | 25-34   | R.DAHKSEVAHR.F                     |                            |
| 76    | 1             | 613.8800  | 120.19             | 2 | 19.7     | 75.4  | 1 | 35-44   | R.FKDLGEENFK.A                     |                            |
| 113   | 1             | 575.3610  | 86.66              | 2 | 22.8     | 68.7  | 0 | 66-75   | K.LVNEVTEFAK.T                     |                            |
| 36    | 1             | 749.8420  | 65.53              | 2 | 16.0     | 103.1 | 0 | 76-88   | K.TCVADESAENCDK.S                  | Carbamidomethyl: 2, 11     |
| 141   | 1             | 1137.9580 | 76.66              | 3 | 26.4     | 75.5  | 2 | 76-105  | K.TCVADESAENCDKSLHTLFGDKLCTVATLR.E | Carbamidomethyl: 2, 11, 24 |
| 72    | 1             | 879.4740  | 68.39              | 3 | 19.4     | 28.6  | 2 | 118-138 | K.QEPERNECFLQHKDDPNLPR.L           | Carbamidomethyl: 8         |
| 56    | 1             | 470.7810  | 113.06             | 2 | 18.0     | 43.3  | 0 | 131-138 | K.DDNPMLPR.L                       |                            |
| 136   | 1             | 695.4180  | 104.70             | 4 | 26.0     | 51.1  | 1 | 139-161 | R.LVRPEVDVMCTAFHDNEETFLKK.Y        | Carbamidomethyl: 10        |
| 104   | 1             | 464.3140  | 137.08             | 2 | 22.2     | 45.0  | 0 | 162-168 | K.YLYEIAR.R                        |                            |
| 128   | 1             | 709.0600  | 83.66              | 3 | 24.6     | 66.8  | 1 | 187-205 | K.AAFTECCQAADKAACLLPK.L            | Carbamidomethyl: 6, 7, 15  |

# Accumulated Protein Report



|     |   |           |        |   |      |       |   |         |                                  |                                   |
|-----|---|-----------|--------|---|------|-------|---|---------|----------------------------------|-----------------------------------|
| 35  | 1 | 759.9560  | 84.81  | 2 | 15.8 | 67.9  | 2 | 206-219 | K.LDELRLDEGKASSAK.Q              |                                   |
| 55  | 1 | 440.7670  | 97.17  | 2 | 17.8 | 59.1  | 0 | 250-257 | K.AEFAEVSK.L                     |                                   |
| 64  | 2 | 1043.9990 | 73.37  | 2 | 18.5 | 79.3  | 0 | 265-281 | K.VHTECCHGDLLECADDR.A            | Carbamidomethyl: 5, 6, 13         |
| 80  | 2 | 862.4440  | 77.20  | 3 | 20.1 | 61.2  | 1 | 265-286 | K.VHTECCHGDLLECADDRADLAK.Y       | Carbamidomethyl: 5, 6, 13         |
| 57  | 1 | 722.3860  | 84.93  | 2 | 18.1 | 88.1  | 0 | 287-298 | K.YICENQDSISSK.L                 | Carbamidomethyl: 3                |
| 45  | 1 | 773.9960  | 121.44 | 2 | 16.9 | 58.7  | 1 | 299-310 | K.LKECCEKPLLEK.S                 | Carbamidomethyl: 4, 5             |
| 166 | 7 | 997.5200  | 68.86  | 3 | 30.4 | 133.7 | 0 | 311-337 | K.SHCIAEVENDEMPADLPSLAADF VESK.D | Carbamidomethyl: 3; Oxidation: 12 |
| 176 | 1 | 992.1790  | 59.79  | 3 | 32.0 | 98.1  | 0 | 311-337 | K.SHCIAEVENDEMPADLPSLAADF VESK.D | Carbamidomethyl: 3                |
| 129 | 1 | 490.0180  | 133.61 | 3 | 24.6 | 73.2  | 1 | 361-372 | R.RHPDYSVLLLLR.L                 |                                   |
| 163 | 2 | 682.4370  | 98.22  | 3 | 29.8 | 81.0  | 0 | 397-413 | K.VFDEFKPLVEEPQNLIK.Q            |                                   |
| 144 | 1 | 829.4640  | 101.33 | 2 | 26.9 | 101.3 | 0 | 414-426 | K.QNCELFEQLGEYK.F                | Carbamidomethyl: 3                |
| 112 | 1 | 820.5460  | 89.57  | 2 | 22.7 | 72.5  | 1 | 438-452 | K.KVPQVSTPTLVEVSR.N              |                                   |
| 26  | 1 | 501.8250  | 84.59  | 2 | 14.9 | 30.9  | 1 | 491-499 | K.TPVSDRVTK.C                    |                                   |
| 132 | 1 | 956.0360  | 69.59  | 2 | 25.2 | 73.7  | 0 | 509-524 | R.RPCFSALEVDETYVPK.E             | Carbamidomethyl: 3                |
| 83  | 1 | 564.9260  | 129.27 | 2 | 20.3 | 68.2  | 1 | 549-558 | K.KQTALVELVK.H                   |                                   |
| 125 | 1 | 500.8760  | 140.77 | 2 | 23.8 | 60.7  | 0 | 550-558 | K.QTALVELVK.H                    |                                   |
| 43  | 1 | 750.3780  | 77.87  | 2 | 16.8 | 66.5  | 1 | 585-597 | K.ADDKETCFAEEGK.K                | Carbamidomethyl: 7                |
| 32  | 1 | 814.4210  | 66.25  | 2 | 15.7 | 66.5  | 2 | 585-598 | K.ADDKETCFAEEGKK.L               | Carbamidomethyl: 7                |

**Protein 2:** Alpha-1-antitrypsin OS=Homo sapiens GN=SERPINA1 PE=1 SV=3  
**Accession:** A1AT\_HUMAN **Score:** 1892.10  
**Database:** SwissProt\_July2013 **MW [kDa]:** 46.70  
**Seq. Coverage [%]:** 51.90 % **pI:** 5.27  
**Modification(s):** Carbamidomethyl, Oxidation, Deamidated **No. of Peptides:** 28

| Cmpd. | No. of Cmpds. | m/z meas. | $\Delta$ m/z [ppm] | z | Rt [min] | Score | P | Range   | Sequence                           | Modification   |
|-------|---------------|-----------|--------------------|---|----------|-------|---|---------|------------------------------------|----------------|
| 30    | 1             | 890.4710  | 93.56              | 2 | 15.4     | 62.3  | 0 | 35-49   | K.TDTSHTDQDHPTFNK.I                |                |
| 159   | 1             | 851.7340  | 381.83             | 4 | 29.2     | 28.2  | 1 | 35-63   | K.TDTSHTDQDHPTFNKITPNLAEF AFSLYR.Q |                |
| 177   | 1             | 859.1420  | 33.55              | 3 | 32.0     | 97.3  | 0 | 126-149 | R.TLNQPDSQLQLTTGNGLFLSEGL K.L      | Deamidated: 15 |
| 171   | 2             | 1287.7150 | 31.74              | 2 | 31.1     | 142.3 | 0 | 126-149 | R.TLNQPDSQLQLTTGNGLFLSEGL          |                |

# Accumulated Protein Report



|     |   |           |        |   |      |       |   |         | K.L                               |                                     |
|-----|---|-----------|--------|---|------|-------|---|---------|-----------------------------------|-------------------------------------|
| 118 | 1 | 603.4020  | 98.71  | 2 | 23.1 | 42.4  | 1 | 150-159 | K.LVDKFLEDVK.K                    |                                     |
| 94  | 1 | 667.4690  | 118.48 | 2 | 21.0 | 64.5  | 2 | 150-160 | K.LVDKFLEDVKK.L                   |                                     |
| 98  | 1 | 772.1090  | 76.61  | 3 | 21.1 | 83.3  | 2 | 160-179 | K.KLYHSEFTVNFQDTEEAKK.Q           |                                     |
| 108 | 1 | 729.4300  | 107.59 | 3 | 22.6 | 57.1  | 1 | 161-179 | K.LYHSEFTVNFQDTEEAKK.Q            |                                     |
| 42  | 1 | 568.8720  | 124.92 | 2 | 16.7 | 68.3  | 1 | 179-187 | K.KQINDYVEK.G                     |                                     |
| 41  | 1 | 804.4930  | 87.00  | 2 | 16.6 | 87.2  | 2 | 179-192 | K.KQINDYVEKGTQGK.I                |                                     |
| 58  | 1 | 504.8080  | 108.04 | 2 | 18.2 | 43.4  | 0 | 180-187 | K.QINDYVEK.G                      |                                     |
| 52  | 1 | 740.4300  | 73.56  | 2 | 17.7 | 30.0  | 1 | 180-192 | K.QINDYVEKGTQGK.I                 |                                     |
| 67  | 1 | 638.4220  | 119.29 | 2 | 18.7 | 52.3  | 1 | 216-225 | K.GKWERPFEVK.D                    |                                     |
| 123 | 1 | 787.9360  | 63.46  | 4 | 23.6 | 44.3  | 2 | 216-241 | K.GKWERPFEVKDTEEDFHVDQVT<br>TVK.V |                                     |
| 86  | 1 | 545.8520  | 117.92 | 2 | 20.5 | 34.5  | 0 | 218-225 | K.WERPFEVK.D                      |                                     |
| 115 | 1 | 946.5000  | 72.45  | 2 | 23.1 | 97.8  | 0 | 226-241 | K.DTEEDFHVDQVTTVK.V               |                                     |
| 124 | 1 | 837.4480  | 74.40  | 3 | 23.7 | 65.2  | 1 | 226-246 | K.DTEEDFHVDQVTTVKVPMK.R           | Oxidation: 19, 20                   |
| 66  | 1 | 632.3630  | 96.04  | 2 | 18.7 | 39.6  | 0 | 248-257 | R.LGMFNIQHCK.K                    | Carbamidomethyl: 9; Oxidation:<br>3 |
| 109 | 1 | 602.0520  | 100.50 | 3 | 22.6 | 59.2  | 0 | 284-298 | K.LQHLENELTHDIITK.F               |                                     |
| 39  | 1 | 539.7860  | 34.39  | 2 | 16.3 | 31.9  | 1 | 299-306 | K.FLENEDRR.S                      |                                     |
| 51  | 1 | 426.7710  | 47.97  | 2 | 17.6 | 52.4  | 0 | 307-314 | R.SASLHLPK.L                      |                                     |
| 126 | 1 | 555.8710  | 117.49 | 2 | 24.2 | 74.0  | 0 | 315-324 | K.LSITGYDLK.S                     |                                     |
| 131 | 1 | 508.3680  | 112.24 | 2 | 25.1 | 81.8  | 0 | 325-334 | K.SVLGQLGITK.V                    |                                     |
| 143 | 2 | 918.0300  | 79.43  | 2 | 26.9 | 130.5 | 0 | 335-352 | K.VFSNGADLSGVTEEAPLK.L            | Deamidated: 4                       |
| 137 | 3 | 917.5360  | 77.30  | 2 | 26.2 | 103.2 | 0 | 335-352 | K.VFSNGADLSGVTEEAPLK.L            |                                     |
| 139 | 3 | 1081.6730 | 94.67  | 2 | 26.3 | 67.8  | 1 | 335-355 | K.VFSNGADLSGVTEEAPLKLSK.A         |                                     |
| 142 | 2 | 1082.1470 | 77.98  | 2 | 26.8 | 88.8  | 1 | 335-355 | K.VFSNGADLSGVTEEAPLKLSK.A         | Deamidated: 4                       |
| 79  | 1 | 444.8030  | 106.86 | 2 | 20.0 | 62.5  | 0 | 360-367 | K.AVLTIDEK.G                      |                                     |

Protein 3: Haptoglobin OS=Homo sapiens GN=HP PE=1 SV=1

Accession: HPT\_HUMAN  
 Database: SwissProt\_July2013  
 Seq. Coverage [%]: 2.70 %

Score: 56.67  
 MW [kDa]: 45.20  
 pI: 6.13  
 No. of Peptides: 1

# Accumulated Protein Report



| Cmpd. | No. of Cmpds. | m/z meas. | $\Delta$ m/z [ppm] | z | Rt [min] | Score | P | Range   | Sequence        | Modification |
|-------|---------------|-----------|--------------------|---|----------|-------|---|---------|-----------------|--------------|
| 23    | 1             | 637.9070  | 132.62             | 2 | 14.6     | 56.7  | 1 | 312-322 | R.HYEGSTVPEKK.T |              |

**Search Type** Combined MS/MS - ProteinExtractor  
**Search Result** Amazon Human\_SPJuly2013\_2016-08-08 18:23:29  
**Search Location** /Kathir/ABC 2016 IgG And A1AT/KA A1AT ACN Drop 3min E2\_RB3\_01\_8253.d/

**Protein 1:** Serum albumin OS=Homo sapiens GN=ALB PE=1 SV=2  
**Accession:** ALBU\_HUMAN **Score:** 1246.00  
**Database:** SwissProt\_July2013 **MW [kDa]:** 69.30  
**Seq. Coverage [%]:** 36.00 % **pI:** 5.88  
**No. of Peptides:** 20

**Modification(s):** Carbamidomethyl

| Cmpd. | No. of Cmpds. | m/z meas. | $\Delta$ m/z [ppm] | z | Rt [min] | Score | P | Range   | Sequence                           | Modification               |
|-------|---------------|-----------|--------------------|---|----------|-------|---|---------|------------------------------------|----------------------------|
| 1     | 1             | 575.3380  | 80.64              | 2 | 14.4     | 58.9  | 1 | 25-34   | R.DAHKSEVAHR.F                     |                            |
| 46    | 1             | 613.8850  | 128.33             | 2 | 19.7     | 75.5  | 1 | 35-44   | R.FKDLGEENFK.A                     |                            |
| 76    | 1             | 575.3560  | 77.96              | 2 | 22.8     | 68.5  | 0 | 66-75   | K.LVNEVTEFAK.T                     |                            |
| 13    | 1             | 749.8410  | 64.20              | 2 | 16.0     | 106.6 | 0 | 76-88   | K.TCVADESAENCDK.S                  | Carbamidomethyl: 2, 11     |
| 93    | 1             | 1137.9510 | 70.51              | 3 | 26.4     | 56.3  | 2 | 76-105  | K.TCVADESAENCDKSLHTLFGDKLCTVATLR.E | Carbamidomethyl: 2, 11, 24 |
| 42    | 1             | 879.4980  | 95.68              | 3 | 19.3     | 26.4  | 2 | 118-138 | K.QEPERNECFLQHKDDNPPLPR.L          | Carbamidomethyl: 8         |
| 45    | 1             | 666.3620  | 71.07              | 3 | 19.6     | 39.8  | 1 | 123-138 | R.NECFLQHKDDNPPLPR.L               | Carbamidomethyl: 3         |
| 29    | 1             | 470.7500  | 47.20              | 2 | 18.0     | 54.7  | 0 | 131-138 | K.DDNPPLPR.L                       |                            |
| 68    | 1             | 464.3210  | 152.16             | 2 | 22.2     | 49.8  | 0 | 162-168 | K.YLYEIAR.R                        |                            |
| 88    | 1             | 709.0680  | 94.95              | 3 | 24.7     | 62.6  | 1 | 187-205 | K.AAFTECCQAADKAACLLPK.L            | Carbamidomethyl: 6, 7, 15  |
| 11    | 1             | 759.9600  | 90.08              | 2 | 15.8     | 61.3  | 2 | 206-219 | K.LDELDRDEGKASSAK.Q                |                            |
| 36    | 1             | 1043.9800 | 55.17              | 2 | 18.6     | 79.8  | 0 | 265-281 | K.VHTECCHGDLLECADDR.A              | Carbamidomethyl: 5, 6, 13  |
| 51    | 1             | 862.4540  | 88.79              | 3 | 20.3     | 47.5  | 1 | 265-286 | K.VHTECCHGDLLECADDRADLAK.Y         | Carbamidomethyl: 5, 6, 13  |
| 30    | 1             | 722.3800  | 76.62              | 2 | 18.1     | 83.4  | 0 | 287-298 | K.YICENQDSISSK.L                   | Carbamidomethyl: 3         |
| 21    | 1             | 516.3250  | 105.68             | 3 | 17.1     | 38.2  | 1 | 299-310 | K.LKECCEKPLLEK.S                   | Carbamidomethyl: 4, 5      |

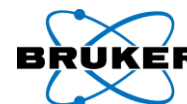

## Accumulated Protein Report

|    |   |          |        |   |      |      |   |         |                     |                    |
|----|---|----------|--------|---|------|------|---|---------|---------------------|--------------------|
| 96 | 1 | 829.3890 | 10.90  | 2 | 27.0 | 80.8 | 0 | 414-426 | K.QNCELFEQLGEYK.F   | Carbamidomethyl: 3 |
| 74 | 1 | 547.3880 | 128.93 | 3 | 22.6 | 61.5 | 1 | 438-452 | K.KVPQVSTPTLVEVSR.N |                    |
| 53 | 1 | 564.9200 | 118.65 | 2 | 20.5 | 64.0 | 1 | 549-558 | K.KQTALVELVK.H      |                    |
| 81 | 1 | 500.8740 | 136.78 | 2 | 23.7 | 42.7 | 0 | 550-558 | K.QTALVELVK.H       |                    |
| 9  | 1 | 543.3110 | 117.58 | 3 | 15.6 | 68.2 | 2 | 585-598 | K.ADDKETCFEEGKK.L   | Carbamidomethyl: 7 |

**Protein 2:** Alpha-1-antitrypsin OS=Homo sapiens GN=SERPINA1 PE=1 SV=3  
**Accession:** A1AT\_HUMAN **Score:** 1217.92  
**Database:** SwissProt\_July2013 **MW [kDa]:** 46.70  
**Seq. Coverage [%]:** 30.60 % **pI:** 5.27  
**No. of Peptides:** 16

**Modification(s):** Oxidation, Deamidated

| Cmpd. | No. of Cmpds. | m/z meas. | $\Delta$ m/z [ppm] | z | Rt [min] | Score | P | Range   | Sequence                  | Modification      |
|-------|---------------|-----------|--------------------|---|----------|-------|---|---------|---------------------------|-------------------|
| 6     | 1             | 890.4060  | 20.56              | 2 | 15.1     | 71.5  | 0 | 35-49   | K.TDTSHTDQDHPFNK.I        |                   |
| 61    | 1             | 772.1110  | 79.20              | 3 | 21.3     | 84.4  | 2 | 160-179 | K.KLYHSEAFVTFNFGDTEEAKK.Q |                   |
| 73    | 1             | 729.4440  | 126.78             | 3 | 22.5     | 54.6  | 1 | 161-179 | K.LYHSEAFVTFNFGDTEEAKK.Q  |                   |
| 17    | 1             | 568.8700  | 121.40             | 2 | 16.7     | 73.1  | 1 | 179-187 | K.KQINDYVEK.G             |                   |
| 16    | 1             | 804.4970  | 91.97              | 2 | 16.6     | 106.0 | 2 | 179-192 | K.KQINDYVEKGTQGK.I        |                   |
| 31    | 1             | 504.8050  | 102.10             | 2 | 18.1     | 42.5  | 0 | 180-187 | K.QINDYVEK.G              |                   |
| 26    | 1             | 740.4460  | 95.17              | 2 | 17.7     | 34.8  | 1 | 180-192 | K.QINDYVEKGTQGK.I         |                   |
| 39    | 1             | 638.4140  | 106.75             | 2 | 18.8     | 53.3  | 1 | 216-225 | K.GKWERPFEVK.D            |                   |
| 78    | 1             | 946.5240  | 97.80              | 2 | 23.1     | 93.7  | 0 | 226-241 | K.DTEEEDFHVDQVTTVK.V      |                   |
| 82    | 1             | 837.4570  | 85.15              | 3 | 23.7     | 68.6  | 1 | 226-246 | K.DTEEEDFHVDQVTTVKVPMMK.R | Oxidation: 19, 20 |
| 25    | 1             | 426.8020  | 120.62             | 2 | 17.5     | 59.0  | 0 | 307-314 | R.SASLHLPK.L              |                   |
| 86    | 1             | 555.8730  | 121.09             | 2 | 24.2     | 89.6  | 0 | 315-324 | K.LSITGTYDLK.S            |                   |
| 89    | 1             | 508.3800  | 135.84             | 2 | 25.1     | 81.8  | 0 | 325-334 | K.SVLGQLGITK.V            |                   |
| 100   | 1             | 918.0000  | 46.75              | 2 | 27.6     | 121.9 | 0 | 335-352 | K.VFSNGADLSGVTEEAPLK.L    | Deamidated: 4     |
| 91    | 2             | 917.5380  | 79.48              | 2 | 26.1     | 109.6 | 0 | 335-352 | K.VFSNGADLSGVTEEAPLK.L    |                   |
| 98    | 1             | 1081.9930 | -64.34             | 2 | 27.4     | 48.9  | 1 | 335-355 | K.VFSNGADLSGVTEEAPLKLSK.A | Deamidated: 4     |

**Protein 3:** Haptoglobin OS=Homo sapiens GN=HP PE=1 SV=1  
**Accession:** HPT\_HUMAN **Score:** 58.55  
**Database:** SwissProt\_July2013 **MW [kDa]:** 45.20



## Accumulated Protein Report

Seq. Coverage [%]: 2.70 %

pl: 6.13  
No. of Peptides: 1

| Cmpd. | No. of Cmpds. | m/z meas. | $\Delta$ m/z [ppm] | z | Rt [min] | Score | P | Range   | Sequence        | Modification |
|-------|---------------|-----------|--------------------|---|----------|-------|---|---------|-----------------|--------------|
| 3     | 1             | 637.9080  | 134.19             | 2 | 14.6     | 58.5  | 1 | 312-322 | R.HYEGSTVPEKK.T |              |

### Search Type

Combined MS/MS - ProteinExtractor

### Search Result

Amazon Human\_SPJuly2013\_2016-08-08 18:23:29

### Search Location

/Kathir/ABC 2016 IgG And A1AT/KA A1AT ACN Spin E3\_RE7\_01\_8316.d/

### Protein 1:

Alpha-1-antitrypsin OS=Homo sapiens GN=SERPINA1 PE=1 SV=3

### Accession:

A1AT\_HUMAN

Score: 310.41

### Database:

SwissProt\_July2013

MW [kDa]: 46.70

### Seq. Coverage [%]:

13.90 %

pl: 5.27

No. of Peptides: 5

| Cmpd. | No. of Cmpds. | m/z meas. | $\Delta$ m/z [ppm] | z | Rt [min] | Score | P | Range   | Sequence            | Modification |
|-------|---------------|-----------|--------------------|---|----------|-------|---|---------|---------------------|--------------|
| 5     | 2             | 890.4170  | 32.91              | 2 | 14.8     | 68.1  | 0 | 35-49   | K.TDTSHHDQDHPTFNK.I |              |
| 72    | 1             | 445.3560  | 210.26             | 3 | 20.9     | 36.7  | 2 | 150-160 | K.LVDKFLEDVKK.L     |              |
| 24    | 1             | 536.6880  | 130.87             | 3 | 16.6     | 60.0  | 2 | 179-192 | K.KQINDYVEKGTQGK.I  |              |
| 39    | 1             | 426.8100  | 139.36             | 2 | 17.5     | 63.8  | 0 | 307-314 | R.SASLHLPK.L        |              |
| 82    | 1             | 508.4360  | 246.01             | 2 | 25.1     | 81.8  | 0 | 325-334 | K.SVLGQLGITK.V      |              |

### Protein 2:

Serum albumin OS=Homo sapiens GN=ALB PE=1 SV=2

### Accession:

ALBU\_HUMAN

Score: 159.82

### Database:

SwissProt\_July2013

MW [kDa]: 69.30

### Seq. Coverage [%]:

5.60 %

pl: 5.88

No. of Peptides: 3

### Modification(s):

Carbamidomethyl



## Accumulated Protein Report

| Cmpd. | No. of Cmpds. | m/z meas. | $\Delta$ m/z [ppm] | z | Rt [min] | Score | P | Range   | Sequence          | Modification       |
|-------|---------------|-----------|--------------------|---|----------|-------|---|---------|-------------------|--------------------|
| 2     | 1             | 575.3310  | 68.47              | 2 | 14.4     | 58.9  | 1 | 25-34   | R.DAHKSEVAHR.F    |                    |
| 65    | 1             | 564.9690  | 205.40             | 2 | 20.2     | 45.0  | 1 | 549-558 | K.KQTALVELVK.H    |                    |
| 19    | 1             | 543.3150  | 124.94             | 3 | 15.8     | 55.9  | 2 | 585-598 | K.ADDKETCFEEGKK.L | Carbamidomethyl: 7 |

**Search Type** Combined MS/MS - ProteinExtractor  
**Search Result** Amazon Human\_SPJuly2013\_2016-08-08 18:23:29  
**Search Location** /Kathir/ABC 2016 IgG And A1AT/KA IgG ACN Drop 1min E1\_RA1\_01\_8261.d/

**Protein 1:** Ig gamma-1 chain C region OS=Homo sapiens GN=IGHG1 PE=1 SV=1  
**Accession:** IGHG1\_HUMAN **Score:** 1006.03  
**Database:** SwissProt\_July2013 **MW [kDa]:** 36.10  
**Seq. Coverage [%]:** 53.60 % **pl:** 9.36  
**No. of Peptides:** 14

**Modification(s):** Carbamidomethyl, Deamidated

| Cmpd. | No. of Cmpds. | m/z meas. | $\Delta$ m/z [ppm] | z | Rt [min] | Score | P | Range   | Sequence                         | Modification              |
|-------|---------------|-----------|--------------------|---|----------|-------|---|---------|----------------------------------|---------------------------|
| 143   | 2             | 593.8670  | 67.42              | 2 | 24.6     | 84.0  | 0 | 5-16    | K.GPSVFPLAPSSK.S                 |                           |
| 129   | 1             | 661.3930  | 76.13              | 2 | 22.5     | 99.0  | 0 | 17-30   | K.STSGGTAALGCLVK.D               | Carbamidomethyl: 11       |
| 169   | 1             | 1112.3070 | 79.22              | 3 | 27.8     | 83.6  | 1 | 102-131 | K.SCDKTHTCPAPPELLGGPSVFLFPPKPK.D | Carbamidomethyl: 2, 8, 11 |
| 175   | 1             | 948.9150  | 95.88              | 3 | 28.7     | 76.8  | 0 | 106-131 | K.THTCPPCPAPPELLGGPSVFLFPPKPK.D  | Carbamidomethyl: 4, 7     |
| 149   | 1             | 713.7280  | 66.33              | 3 | 25.1     | 77.6  | 0 | 139-157 | R.TPEVTCVVVDVSHEDPEVK.F          | Carbamidomethyl: 6        |
| 146   | 1             | 839.4790  | 88.60              | 2 | 24.8     | 79.6  | 0 | 158-171 | K.FNWYVDGVEVHNAK.T               |                           |
| 126   | 1             | 643.9040  | 98.47              | 2 | 22.2     | 34.1  | 0 | 228-238 | R.EPQVYTLPPSR.D                  |                           |
| 131   | 1             | 937.0520  | 67.53              | 2 | 22.6     | 56.1  | 1 | 228-243 | R.EPQVYTLPPSRDELTK.N             |                           |
| 138   | 1             | 581.3960  | 133.41             | 2 | 23.7     | 76.5  | 0 | 244-253 | K.NQVSLTCLVK.G                   | Carbamidomethyl: 7        |
| 181   | 3             | 1272.5730 | 2.89               | 2 | 29.7     | 88.4  | 0 | 254-275 | K.GFYPSDIAVEWESNGQPENNYK.T       |                           |
| 182   | 2             | 1273.0780 | 13.09              | 2 | 30.1     | 118.3 | 0 | 254-275 | K.GFYPSDIAVEWESNGQPENNYK.        | Deamidated: 14            |





## Accumulated Protein Report

| Protein | Peptide | m/z       | Δ m/z | z | Rt   | Score | P | Range   | Sequence                   | Modification       |
|---------|---------|-----------|-------|---|------|-------|---|---------|----------------------------|--------------------|
| 184     | 2       | 1273.0660 | 3.67  | 2 | 30.6 | 88.1  | 0 | 254-275 | K.GFYPSDIAVEWESNGQPENNYK.  | Deamidated: 19     |
| 183     | 1       | 937.5460  | 86.88 | 2 | 30.4 | 88.7  | 0 | 276-292 | K.TTPVLDSDGSFFLYSK.L       |                    |
| 136     | 1       | 934.4940  | 71.46 | 3 | 23.6 | 43.3  | 0 | 300-322 | R.WQQGNVFSCSVMEALHNHYTQK.S | Carbamidomethyl: 9 |

**Protein 2:** Ig kappa chain C region OS=Homo sapiens GN=IGKC PE=1 SV=1  
**Accession:** IGKC\_HUMAN **Score:** 978.45  
**Database:** SwissProt\_July2013 **MW [kDa]:** 11.60  
**Seq. Coverage [%]:** 90.60 % **pI:** 5.53  
**No. of Peptides:** 10

**Modification(s):** Carbamidomethyl, Deamidated

| Cmpd. | No. of Cmpds. | m/z meas. | Δ m/z [ppm] | z | Rt [min] | Score | P | Range | Sequence                                  | Modification       |
|-------|---------------|-----------|-------------|---|----------|-------|---|-------|-------------------------------------------|--------------------|
| 185   | 1             | 973.5860  | 70.76       | 2 | 30.9     | 92.8  | 0 | 1-18  | -.TVAAPSVFIFPPSDEQLK.S                    |                    |
| 187   | 1             | 899.5210  | 77.54       | 2 | 32.2     | 63.3  | 0 | 19-34 | K.SGTASVVCLLNMFYPR.E                      | Carbamidomethyl: 8 |
| 127   | 1             | 893.1240  | 32.64       | 3 | 22.4     | 107.6 | 1 | 38-61 | K.VQWKVDNALQSGNSQESVTEQDS<br>K.D          |                    |
| 97    | 4             | 1068.9350 | 418.35      | 2 | 19.0     | 136.9 | 0 | 42-61 | K.VDNALQSGNSQESVTEQDSK.D                  |                    |
| 103   | 2             | 1069.0500 | 65.47       | 2 | 19.5     | 109.8 | 0 | 42-61 | K.VDNALQSGNSQESVTEQDSK.D                  | Deamidated: 6      |
| 155   | 2             | 1207.5860 | 285.53      | 3 | 26.1     | 127.8 | 1 | 42-75 | K.VDNALQSGNSQESVTEQDSKDST<br>YLSSTLTLSK.A |                    |
| 161   | 1             | 751.9630  | 106.58      | 2 | 27.0     | 103.1 | 0 | 62-75 | K.DSTYLSSTLTLSK.A                         |                    |
| 45    | 1             | 445.7500  | 62.89       | 2 | 14.4     | 26.7  | 1 | 76-82 | K.ADYEKHK.V                               |                    |
| 92    | 1             | 1071.1520 | 100.80      | 2 | 18.4     | 138.7 | 1 | 81-99 | K.HKVYACEVTHQGLSSPVTK.S                   | Carbamidomethyl: 6 |
| 108   | 1             | 626.0340  | 85.48       | 3 | 20.3     | 71.7  | 0 | 83-99 | K.VYACEVTHQGLSSPVTK.S                     | Carbamidomethyl: 4 |

**Protein 3:** Ig gamma-2 chain C region OS=Homo sapiens GN=IGHG2 PE=1 SV=2  
**Accession:** IGHG2\_HUMAN **Score:** 478.09  
**Database:** SwissProt\_July2013 **MW [kDa]:** 35.90  
**Seq. Coverage [%]:** 26.10 % **pI:** 8.80  
**No. of Peptides:** 6

**Modification(s):** Carbamidomethyl, Oxidation



## Accumulated Protein Report

| Cmpd. | No. of Cmpds. | m/z meas. | $\Delta$ m/z [ppm] | z | Rt [min] | Score | P | Range   | Sequence                          | Modification                |
|-------|---------------|-----------|--------------------|---|----------|-------|---|---------|-----------------------------------|-----------------------------|
| 152   | 1             | 644.3870  | 89.48              | 2 | 25.4     | 52.3  | 0 | 5-16    | K.GPSVFPLAPCSR.S                  | Carbamidomethyl: 10         |
| 134   | 1             | 712.4140  | 77.91              | 2 | 23.2     | 77.6  | 0 | 17-30   | R.STSESTAALGCLVK.D                | Carbamidomethyl: 11         |
| 178   | 2             | 970.2120  | 75.51              | 3 | 29.3     | 68.8  | 0 | 102-127 | K.CCVECPCPAPPVAGPSVFLFPP<br>KPK.D | Carbamidomethyl: 1, 2, 5, 8 |
| 112   | 4             | 961.0560  | 87.19              | 2 | 20.8     | 38.6  | 1 | 224-239 | R.EPQVYTLPPSREEMTK.N              | Oxidation: 14               |
| 123   | 1             | 953.0670  | 96.79              | 2 | 21.6     | 46.0  | 1 | 224-239 | R.EPQVYTLPPSREEMTK.N              |                             |
| 180   | 1             | 961.5180  | 72.76              | 2 | 29.2     | 41.0  | 0 | 272-288 | K.TTPMLDSDGSFFLYSK.L              | Oxidation: 5                |

**Protein 4:** Ig gamma-4 chain C region OS=Homo sapiens GN=IGHG4 PE=1 SV=1  
**Accession:** IGHG4\_HUMAN **Score:** 462.53  
**Database:** SwissProt\_July2013 **MW [kDa]:** 35.90  
**Seq. Coverage [%]:** 4.30 % **pI:** 7.80  
**No. of Peptides:** 1

**Modification(s):** Carbamidomethyl, Deamidated

| Cmpd. | No. of Cmpds. | m/z meas. | $\Delta$ m/z [ppm] | z | Rt [min] | Score | P | Range | Sequence           | Modification       |
|-------|---------------|-----------|--------------------|---|----------|-------|---|-------|--------------------|--------------------|
| 48    | 1             | 832.9780  | 107.47             | 2 | 14.7     | 49.5  | 0 | 80-93 | K.TYTCNVDPKPSNTK.V | Carbamidomethyl: 4 |

**Protein 5:** Ig gamma-3 chain C region OS=Homo sapiens GN=IGHG3 PE=1 SV=2  
**Accession:** IGHG3\_HUMAN **Score:** 407.07  
**Database:** SwissProt\_July2013 **MW [kDa]:** 41.30  
**Seq. Coverage [%]:** 2.70 % **pI:** 9.41  
**No. of Peptides:** 1

**Modification(s):** Carbamidomethyl, Oxidation

| Cmpd. | No. of Cmpds. | m/z meas. | $\Delta$ m/z [ppm] | z | Rt [min] | Score | P | Range   | Sequence       | Modification          |
|-------|---------------|-----------|--------------------|---|----------|-------|---|---------|----------------|-----------------------|
| 69    | 1             | 593.8090  | 94.96              | 2 | 16.4     | 60.6  | 0 | 119-128 | K.SCDTPPPCPR.C | Carbamidomethyl: 2, 8 |

**Protein 6:** Ig lambda-2 chain C regions OS=Homo sapiens GN=IGLC2 PE=1 SV=1  
**Accession:** LAC2\_HUMAN **Score:** 357.87  
**Database:** SwissProt\_July2013 **MW [kDa]:** 11.30  
**Seq. Coverage [%]:** 62.30 % **pI:** 7.73  
**No. of Peptides:** 5



## Accumulated Protein Report

Modification(s): Carbamidomethyl

| Cmpd. | No. of Cmpds. | m/z meas. | $\Delta$ m/z [ppm] | z | Rt [min] | Score | P | Range | Sequence                | Modification       |
|-------|---------------|-----------|--------------------|---|----------|-------|---|-------|-------------------------|--------------------|
| 163   | 1             | 993.5830  | 70.90              | 2 | 27.2     | 85.8  | 0 | 5-23  | K.AAPSVTLFPPSSEELQANK.A |                    |
| 80    | 1             | 838.0260  | 113.53             | 2 | 17.3     | 54.4  | 1 | 44-60 | K.ADSSPVKAGVETTTPSK.Q   |                    |
| 54    | 1             | 495.7990  | 81.20              | 2 | 15.3     | 69.6  | 0 | 51-60 | K.AGVETTTPSK.Q          |                    |
| 172   | 1             | 872.5040  | 81.32              | 2 | 28.4     | 90.8  | 0 | 66-80 | K.YAASSYLSLTPEQWK.S     |                    |
| 81    | 1             | 856.4490  | 76.80              | 2 | 17.4     | 57.3  | 0 | 84-98 | R.SYSCQVTHEGSTVEK.T     | Carbamidomethyl: 4 |

**Protein 7:** Ig lambda-1 chain C regions OS=Homo sapiens GN=IGLC1 PE=1 SV=1  
**Accession:** LAC1\_HUMAN **Score:** 208.52  
**Database:** SwissProt\_July2013 **MW [kDa]:** 11.30  
**Seq. Coverage [%]:** 17.90 % **pI:** 9.16  
**No. of Peptides:** 1

Modification(s): Carbamidomethyl

| Cmpd. | No. of Cmpds. | m/z meas. | $\Delta$ m/z [ppm] | z | Rt [min] | Score | P | Range | Sequence                | Modification |
|-------|---------------|-----------|--------------------|---|----------|-------|---|-------|-------------------------|--------------|
| 164   | 1             | 1022.0700 | 45.70              | 2 | 27.2     | 60.5  | 0 | 5-23  | K.ANPTVTLFPPSSEELQANK.A |              |

**Protein 8:** Ig kappa chain V-III region NG9 (Fragment) OS=Homo sapiens PE=1 SV=1  
**Accession:** KV303\_HUMAN **Score:** 86.39  
**Database:** SwissProt\_July2013 **MW [kDa]:** 10.70  
**Seq. Coverage [%]:** 22.00 % **pI:** 7.08  
**No. of Peptides:** 1

| Cmpd. | No. of Cmpds. | m/z meas. | $\Delta$ m/z [ppm] | z | Rt [min] | Score | P | Range | Sequence                       | Modification |
|-------|---------------|-----------|--------------------|---|----------|-------|---|-------|--------------------------------|--------------|
| 139   | 1             | 813.7900  | 61.57              | 3 | 24.0     | 86.4  | 0 | 29-50 | R.ASQSVSSSYLAWYQQKPGQAPR.<br>L |              |

**Protein 9:** Ig heavy chain V-III region HIL OS=Homo sapiens PE=1 SV=1  
**Accession:** HV310\_HUMAN **Score:** 58.30  
**Database:** SwissProt\_July2013 **MW [kDa]:** 13.60



## Accumulated Protein Report

Seq. Coverage [%]: 13.20 %

pl: 9.93  
No. of Peptides: 1

| Cmpd. | No. of Cmpds. | m/z meas. | $\Delta$ m/z [ppm] | z | Rt [min] | Score | P | Range | Sequence             | Modification |
|-------|---------------|-----------|--------------------|---|----------|-------|---|-------|----------------------|--------------|
| 171   | 1             | 796.9910  | 32.39              | 2 | 28.4     | 58.3  | 1 | 1-16  | ..QVKLVQAGGGVVQPGR.S |              |

### Search Type Search Result Search Location

Combined MS/MS - ProteinExtractor  
Amazon Human\_SPJuly2013\_2016-08-08 18:23:29  
/Kathir/ABC 2016 IgG And A1AT/KA IgG ACN Drop 1min E2\_RA2\_01\_8248.d/

### Protein 1:

Ig gamma-1 chain C region OS=Homo sapiens GN=IGHG1 PE=1 SV=1

### Accession:

IGHG1\_HUMAN

### Score:

902.26

### Database:

SwissProt\_July2013

### MW [kDa]:

36.10

### Seq. Coverage [%]:

48.80 %

### pl:

9.36

### No. of Peptides:

12

### Modification(s):

Carbamidomethyl, Oxidation, Deamidated

| Cmpd. | No. of Cmpds. | m/z meas. | $\Delta$ m/z [ppm] | z | Rt [min] | Score | P | Range   | Sequence                                | Modification              |
|-------|---------------|-----------|--------------------|---|----------|-------|---|---------|-----------------------------------------|---------------------------|
| 115   | 1             | 593.8660  | 65.74              | 2 | 24.6     | 67.2  | 0 | 5-16    | K.GPSVFPLAPSSK.S                        |                           |
| 107   | 1             | 661.3950  | 79.15              | 2 | 22.5     | 94.3  | 0 | 17-30   | K.STSGGTAALGCLVK.D                      | Carbamidomethyl: 11       |
| 133   | 1             | 834.4310  | 17.99              | 4 | 27.6     | 63.9  | 1 | 102-131 | K.SCDKTHTCPPCPAPPELLGGPSVF<br>LFPPKPK.D | Carbamidomethyl: 2, 8, 11 |
| 80    | 1             | 426.2710  | 123.87             | 2 | 19.9     | 44.3  | 0 | 132-138 | K.DTLMISR.T                             | Oxidation: 4              |
| 119   | 1             | 713.7320  | 71.94              | 3 | 25.3     | 68.0  | 0 | 139-157 | R.TPEVTCVVVDVSHEDPEVK.F                 | Carbamidomethyl: 6        |
| 116   | 1             | 839.4720  | 80.26              | 2 | 24.8     | 89.3  | 0 | 158-171 | K.FNWFYVDGVEVHNAK.T                     |                           |
| 108   | 1             | 937.0620  | 78.20              | 2 | 22.7     | 42.3  | 1 | 228-243 | R.EPQVYTLPPSRDELTK.N                    |                           |
| 113   | 1             | 581.3960  | 133.41             | 2 | 23.8     | 79.3  | 0 | 244-253 | K.NQVSLTCLVK.G                          | Carbamidomethyl: 7        |
| 166   | 2             | 1273.1070 | 35.87              | 2 | 30.2     | 102.6 | 0 | 254-275 | K.GFYPSDIAVEWESNGQPENNYK.<br>T          | Deamidated: 14            |
| 172   | 2             | 1273.6070 | 428.63             | 2 | 30.6     | 55.4  | 0 | 254-275 | K.GFYPSDIAVEWESNGQPENNYK.<br>T          | Deamidated: 19            |



## Accumulated Protein Report

|     |   |           |        |   |      |      |   |         |                                |  |
|-----|---|-----------|--------|---|------|------|---|---------|--------------------------------|--|
| 162 | 2 | 1272.6060 | 28.82  | 2 | 29.7 | 85.0 | 0 | 254-275 | K.GFYPSDIAVEWESNGQPENNYK.<br>T |  |
| 169 | 1 | 937.5680  | 110.35 | 2 | 30.4 | 83.1 | 0 | 276-292 | K.TTPPVLDSDGSFFLYSK.L          |  |

**Protein 2:** Ig kappa chain C region OS=Homo sapiens GN=IGKC PE=1 SV=1  
**Accession:** IGKC\_HUMAN **Score:** 749.97  
**Database:** SwissProt\_July2013 **MW [kDa]:** 11.60  
**Seq. Coverage [%]:** 75.50 % **pl:** 5.53  
**No. of Peptides:** 8

**Modification(s):** Carbamidomethyl, Deamidated

| Cmpd. | No. of Cmpds. | m/z meas. | $\Delta$ m/z [ppm] | z | Rt [min] | Score | P | Range | Sequence                                 | Modification       |
|-------|---------------|-----------|--------------------|---|----------|-------|---|-------|------------------------------------------|--------------------|
| 174   | 1             | 973.6200  | 105.68             | 2 | 31.0     | 82.7  | 0 | 1-18  | -.TVAAPSVFIFPPSDEQLK.S                   |                    |
| 105   | 1             | 893.1320  | 41.60              | 3 | 22.4     | 87.9  | 1 | 38-61 | K.VQWKVDNALQSGNSQESVTEQDS<br>K.D         |                    |
| 70    | 6             | 1068.8840 | 370.62             | 2 | 18.9     | 140.8 | 0 | 42-61 | K.VDNALQSGNSQESVTEQDSK.D                 |                    |
| 127   | 1             | 1207.2630 | 17.98              | 3 | 26.7     | 124.1 | 1 | 42-75 | K.VDNALQSGNSQESVTEQDSKST<br>YLSSTLTLSK.A |                    |
| 128   | 1             | 751.9720  | 118.55             | 2 | 27.0     | 92.2  | 0 | 62-75 | K.DSTYLSSTLTLSK.A                        |                    |
| 17    | 1             | 445.7670  | 101.03             | 2 | 14.4     | 25.4  | 1 | 76-82 | K.ADYEKHK.V                              |                    |
| 64    | 1             | 1071.1560 | 104.54             | 2 | 18.3     | 113.0 | 1 | 81-99 | K.HKVYACEVTHQGLSSPVTK.S                  | Carbamidomethyl: 6 |
| 84    | 1             | 938.5600  | 98.99              | 2 | 20.4     | 83.9  | 0 | 83-99 | K.VYACEVTHQGLSSPVTK.S                    | Carbamidomethyl: 4 |

**Protein 3:** Ig gamma-4 chain C region OS=Homo sapiens GN=IGHG4 PE=1 SV=1  
**Accession:** IGHG4\_HUMAN **Score:** 541.36  
**Database:** SwissProt\_July2013 **MW [kDa]:** 35.90  
**Seq. Coverage [%]:** 12.20 % **pl:** 7.80  
**No. of Peptides:** 3

**Modification(s):** Carbamidomethyl, Oxidation, Deamidated

| Cmpd. | No. of Cmpds. | m/z meas. | $\Delta$ m/z [ppm] | z | Rt [min] | Score | P | Range | Sequence            | Modification        |
|-------|---------------|-----------|--------------------|---|----------|-------|---|-------|---------------------|---------------------|
| 120   | 1             | 644.3950  | 101.89             | 2 | 25.5     | 64.4  | 0 | 5-16  | K.GPSVFPLAPCSR.S    | Carbamidomethyl: 10 |
| 111   | 1             | 712.4210  | 87.74              | 2 | 23.2     | 64.8  | 0 | 17-30 | R.STSESTAALGCLVK.D  | Carbamidomethyl: 11 |
| 21    | 1             | 832.9680  | 95.47              | 2 | 14.6     | 36.2  | 0 | 80-93 | K.TYTCNVDPHKPSNTK.V | Carbamidomethyl: 4  |

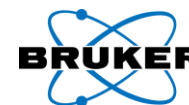

## Accumulated Protein Report

**Protein 4:** Ig gamma-2 chain C region OS=Homo sapiens GN=IGHG2 PE=1 SV=2  
**Accession:** IGHG2\_HUMAN **Score:** 486.69  
**Database:** SwissProt\_July2013 **MW [kDa]:** 35.90  
**Seq. Coverage [%]:** 18.10 % **pl:** 8.80  
**No. of Peptides:** 4

**Modification(s):** Carbamidomethyl, Oxidation

| Cmpd. | No. of Cmpds. | m/z meas. | $\Delta$ m/z [ppm] | z | Rt [min] | Score | P | Range   | Sequence                          | Modification                |
|-------|---------------|-----------|--------------------|---|----------|-------|---|---------|-----------------------------------|-----------------------------|
| 155   | 1             | 970.1810  | 43.56              | 3 | 29.2     | 60.3  | 0 | 102-127 | K.CCVECPCPAPPVAGPSVFLFPP<br>KPK.D | Carbamidomethyl: 1, 2, 5, 8 |
| 88    | 3             | 961.0620  | 93.43              | 2 | 20.8     | 56.2  | 1 | 224-239 | R.EPQVYTLPPSREEMTK.N              | Oxidation: 14               |
| 97    | 1             | 953.0730  | 103.09             | 2 | 21.7     | 34.0  | 1 | 224-239 | R.EPQVYTLPPSREEMTK.N              |                             |
| 156   | 2             | 961.5300  | 85.24              | 2 | 29.3     | 65.2  | 0 | 272-288 | K.TTPPMLDSDGSFFLYSK.L             | Oxidation: 5                |

**Protein 5:** Ig lambda-2 chain C regions OS=Homo sapiens GN=IGLC2 PE=1 SV=1  
**Accession:** LAC2\_HUMAN **Score:** 375.35  
**Database:** SwissProt\_July2013 **MW [kDa]:** 11.30  
**Seq. Coverage [%]:** 62.30 % **pl:** 7.73  
**No. of Peptides:** 5

**Modification(s):** Carbamidomethyl

| Cmpd. | No. of Cmpds. | m/z meas. | $\Delta$ m/z [ppm] | z | Rt [min] | Score | P | Range | Sequence                | Modification       |
|-------|---------------|-----------|--------------------|---|----------|-------|---|-------|-------------------------|--------------------|
| 131   | 1             | 993.6030  | 91.03              | 2 | 27.3     | 78.2  | 0 | 5-23  | K.AAPSVTLFPPSSEELQANK.A |                    |
| 54    | 1             | 838.0160  | 101.59             | 2 | 17.4     | 51.9  | 1 | 44-60 | K.ADSSPVKAGVETTTPSK.Q   |                    |
| 28    | 1             | 495.8010  | 85.23              | 2 | 15.3     | 73.2  | 0 | 51-60 | K.AGVETTTPSK.Q          |                    |
| 143   | 1             | 872.5190  | 98.52              | 2 | 28.4     | 88.4  | 0 | 66-80 | K.YAASSYLSLTPEQWK.S     |                    |
| 53    | 1             | 856.4630  | 93.14              | 2 | 17.3     | 83.6  | 0 | 84-98 | R.SYSCQVTHEGSTVEK.T     | Carbamidomethyl: 4 |

**Protein 6:** Immunoglobulin lambda-like polypeptide 5 OS=Homo sapiens GN=IGLL5 PE=2 SV=2  
**Accession:** IGLL5\_HUMAN **Score:** 347.56  
**Database:** SwissProt\_July2013 **MW [kDa]:** 23.00  
**Seq. Coverage [%]:** 17.30 % **pl:** 10.03  
**No. of Peptides:** 3

**Modification(s):** Carbamidomethyl



## Accumulated Protein Report

| Cmpd. | No. of Cmpds. | m/z meas. | $\Delta$ m/z [ppm] | z | Rt [min] | Score | P | Range   | Sequence                | Modification |
|-------|---------------|-----------|--------------------|---|----------|-------|---|---------|-------------------------|--------------|
| 67    | 1             | 421.3090  | 114.59             | 2 | 18.3     | 39.0  | 0 | 105-112 | K.VTVLGQPK.A            |              |
| 130   | 2             | 1022.0870 | 62.33              | 2 | 27.2     | 65.6  | 0 | 113-131 | K.ANPTVTLFPPSSEELQANK.A |              |
| 18    | 1             | 509.3480  | 128.83             | 2 | 14.5     | 70.9  | 0 | 159-168 | K.AGVETTKPSK.Q          |              |

**Protein 7:** Ig kappa chain V-I region Lay OS=Homo sapiens PE=1 SV=1  
**Accession:** KV113\_HUMAN **Score:** 57.52  
**Database:** SwissProt\_July2013 **MW [kDa]:** 11.80  
**Seq. Coverage [%]:** 8.30 % **pI:** 9.17  
**No. of Peptides:** 1

| Cmpd. | No. of Cmpds. | m/z meas. | $\Delta$ m/z [ppm] | z | Rt [min] | Score | P | Range | Sequence      | Modification |
|-------|---------------|-----------|--------------------|---|----------|-------|---|-------|---------------|--------------|
| 102   | 1             | 497.3470  | 114.59             | 2 | 22.1     | 57.5  | 0 | 46-54 | K.LLIYGASTR.E |              |

**Search Type:** Combined MS/MS - ProteinExtractor  
**Search Result:** Amazon Human\_SPJuly2013\_2016-08-08 18:23:29  
**Search Location:** /Kathir/ABC 2016 IgG And A1AT/KA A1AT EtOH Drop 1min E2\_RD5\_01\_8282.d/

**Protein 1:** Serum albumin OS=Homo sapiens GN=ALB PE=1 SV=2  
**Accession:** ALBU\_HUMAN **Score:** 1977.31  
**Database:** SwissProt\_July2013 **MW [kDa]:** 69.30  
**Seq. Coverage [%]:** 54.80 % **pI:** 5.88  
**No. of Peptides:** 31

**Modification(s):** Carbamidomethyl, Oxidation

| Cmpd. | No. of Cmpds. | m/z meas. | $\Delta$ m/z [ppm] | z | Rt [min] | Score | P | Range | Sequence       | Modification |
|-------|---------------|-----------|--------------------|---|----------|-------|---|-------|----------------|--------------|
| 19    | 1             | 575.3600  | 118.88             | 2 | 14.4     | 58.9  | 1 | 25-34 | R.DAHKSEVAHR.F |              |
| 69    | 2             | 613.8610  | 89.23              | 2 | 19.7     | 75.5  | 1 | 35-44 | R.FKDLGEENFK.A |              |



# Accumulated Protein Report

|     |   |           |        |   |      |       |   |         |                                    |                                      |
|-----|---|-----------|--------|---|------|-------|---|---------|------------------------------------|--------------------------------------|
| 107 | 1 | 575.3720  | 105.78 | 2 | 22.8 | 77.1  | 0 | 66-75   | K.LVNEVTEFAK.T                     |                                      |
| 32  | 1 | 749.8450  | 69.54  | 2 | 16.1 | 112.3 | 0 | 76-88   | K.TCVADESAENCDK.S                  | Carbamidomethyl: 2, 11               |
| 138 | 1 | 1137.9270 | 49.42  | 3 | 26.4 | 58.4  | 2 | 76-105  | K.TCVADESAENCDKSLHTLFGDKLCTVATLR.E | Carbamidomethyl: 2, 11, 24           |
| 47  | 1 | 725.8310  | 87.08  | 2 | 17.4 | 64.1  | 0 | 106-117 | R.ETYGEMADCCAK.Q                   | Carbamidomethyl: 9, 10; Oxidation: 6 |
| 41  | 1 | 572.3160  | 79.72  | 3 | 17.0 | 23.4  | 1 | 118-130 | K.QEPERNECFLQHK.D                  | Carbamidomethyl: 8                   |
| 71  | 1 | 659.8340  | 33.02  | 4 | 19.8 | 24.2  | 2 | 118-138 | K.QEPERNECFLQHKDDNPPLPR.L          | Carbamidomethyl: 8                   |
| 54  | 1 | 470.7890  | 130.05 | 2 | 18.0 | 42.5  | 0 | 131-138 | K.DDNPPLPR.L                       |                                      |
| 72  | 1 | 528.3660  | 129.01 | 2 | 19.8 | 48.4  | 1 | 161-168 | K.KYLYEIAR.R                       |                                      |
| 97  | 1 | 464.3160  | 141.39 | 2 | 22.2 | 40.5  | 0 | 162-168 | K.YLYEIAR.R                        |                                      |
| 31  | 1 | 506.9670  | 72.74  | 3 | 15.9 | 56.3  | 2 | 206-219 | K.LDELDRDEGKASSAK.Q                |                                      |
| 60  | 1 | 1043.9650 | 40.80  | 2 | 18.5 | 80.5  | 0 | 265-281 | K.VHTECCHGDLLECADDR.A              | Carbamidomethyl: 5, 6, 13            |
| 74  | 2 | 862.4320  | 63.28  | 3 | 20.1 | 73.8  | 1 | 265-286 | K.VHTECCHGDLLECADDRADLAK.Y         | Carbamidomethyl: 5, 6, 13            |
| 55  | 1 | 722.3680  | 60.01  | 2 | 18.2 | 91.0  | 0 | 287-298 | K.YICENQDSISSK.L                   | Carbamidomethyl: 3                   |
| 43  | 1 | 773.9790  | 99.47  | 2 | 17.0 | 61.7  | 1 | 299-310 | K.LKECCEKPLLEK.S                   | Carbamidomethyl: 4, 5                |
| 182 | 5 | 997.5440  | 92.92  | 3 | 30.8 | 117.9 | 0 | 311-337 | K.SHCIAEVENDEMPADLPSLAADFVESK.D    | Carbamidomethyl: 3; Oxidation: 12    |
| 190 | 1 | 992.2180  | 99.10  | 3 | 31.9 | 103.3 | 0 | 311-337 | K.SHCIAEVENDEMPADLPSLAADFVESK.D    | Carbamidomethyl: 3                   |
| 27  | 1 | 599.3310  | 81.66  | 2 | 15.7 | 32.7  | 1 | 338-347 | K.DVCKNYAEAK.D                     | Carbamidomethyl: 3                   |
| 124 | 1 | 490.0350  | 168.31 | 3 | 24.6 | 67.8  | 1 | 361-372 | R.RHPDYSVLLLLR.L                   |                                      |
| 176 | 1 | 682.4540  | 123.14 | 3 | 29.6 | 62.3  | 0 | 397-413 | K.VFDEFKPLVEEPQNLIK.Q              |                                      |
| 148 | 1 | 829.4810  | 121.82 | 2 | 27.0 | 80.9  | 0 | 414-426 | K.QNCELFEQLGEYK.F                  | Carbamidomethyl: 3                   |
| 106 | 1 | 820.5490  | 93.22  | 2 | 22.7 | 78.0  | 1 | 438-452 | K.KVPQVSTPTLVEVSR.N                |                                      |
| 23  | 1 | 501.8260  | 86.58  | 2 | 15.1 | 28.8  | 1 | 491-499 | K.TPVSDRVTK.C                      |                                      |
| 49  | 1 | 569.7840  | 55.08  | 2 | 17.7 | 55.4  | 0 | 500-508 | K.CCTESLVNR.R                      | Carbamidomethyl: 1, 2                |
| 128 | 1 | 637.7290  | 125.86 | 3 | 25.2 | 58.3  | 0 | 509-524 | R.RPCFSALEVDETYVPK.E               | Carbamidomethyl: 3                   |
| 145 | 1 | 849.1200  | 70.30  | 3 | 26.8 | 57.4  | 1 | 525-545 | K.EFNAETFTFHADICTLSEKER.Q          | Carbamidomethyl: 14                  |
| 77  | 1 | 564.9180  | 115.11 | 2 | 20.2 | 63.1  | 1 | 549-558 | K.QTALVELVK.H                      |                                      |
| 118 | 1 | 500.8940  | 176.72 | 2 | 23.7 | 49.2  | 0 | 550-558 | K.QTALVELVK.H                      |                                      |
| 40  | 1 | 750.3680  | 64.55  | 2 | 16.9 | 61.6  | 1 | 585-597 | K.ADDKETCFAEEGK.K                  | Carbamidomethyl: 7                   |
| 29  | 1 | 814.4140  | 57.65  | 2 | 15.8 | 72.0  | 2 | 585-598 | K.ADDKETCFAEEGKK.L                 | Carbamidomethyl: 7                   |

Protein 2: Alpha-1-antitrypsin OS=Homo sapiens GN=SERPINA1 PE=1 SV=3  
 Accession: A1AT\_HUMAN

Score:

1586.31





## Accumulated Protein Report

Database:  
Seq. Coverage [%]:

SwissProt\_July2013  
50.70 %

MW [kDa]:  
pI:  
No. of Peptides:

46.70  
5.27  
26

Modification(s): Carbamidomethyl, Oxidation, Deamidated

| Cmpd. | No. of Cmpds. | m/z meas. | $\Delta$ m/z [ppm] | z | Rt [min] | Score | P | Range   | Sequence                              | Modification                         |
|-------|---------------|-----------|--------------------|---|----------|-------|---|---------|---------------------------------------|--------------------------------------|
| 21    | 1             | 593.9640  | 61.36              | 3 | 14.8     | 54.3  | 0 | 35-49   | K.TDTSHTDQDHPTFNK.I                   |                                      |
| 173   | 1             | 1135.2810 | 67.72              | 3 | 29.4     | 39.3  | 1 | 35-63   | K.TDTSHTDQDHPTFNKITPNLAEF<br>AFSLYR.Q | Deamidated: 14                       |
| 111   | 1             | 603.4250  | 136.83             | 2 | 23.1     | 39.1  | 1 | 150-159 | K.LVDKFLEDVK.K                        |                                      |
| 85    | 1             | 667.4540  | 96.00              | 2 | 21.0     | 64.7  | 2 | 150-160 | K.LVDKFLEDVKK.L                       |                                      |
| 88    | 1             | 772.1100  | 77.91              | 3 | 21.2     | 99.6  | 2 | 160-179 | K.KLYHSEFTVNFQDTEEAKK.Q               |                                      |
| 125   | 1             | 686.7310  | 113.29             | 3 | 24.6     | 49.1  | 0 | 161-178 | K.LYHSEFTVNFQDTEEAK.K                 |                                      |
| 104   | 2             | 729.4010  | 67.83              | 3 | 22.7     | 63.0  | 1 | 161-179 | K.LYHSEFTVNFQDTEEAKK.Q                |                                      |
| 38    | 1             | 568.8610  | 105.58             | 2 | 16.8     | 68.4  | 1 | 179-187 | K.KQINDYVEK.G                         |                                      |
| 37    | 1             | 804.4880  | 80.78              | 2 | 16.6     | 72.4  | 2 | 179-192 | K.KQINDYVEKGTQGK.I                    |                                      |
| 56    | 1             | 504.7960  | 84.27              | 2 | 18.2     | 40.5  | 0 | 180-187 | K.QINDYVEK.G                          |                                      |
| 51    | 1             | 740.4220  | 62.76              | 2 | 17.7     | 35.1  | 1 | 180-192 | K.QINDYVEKGTQGK.I                     |                                      |
| 63    | 1             | 638.3690  | 36.26              | 2 | 18.6     | 41.0  | 1 | 216-225 | K.GKWERPFEVK.D                        |                                      |
| 78    | 1             | 545.8550  | 123.42             | 2 | 20.4     | 31.8  | 0 | 218-225 | K.WERPFEVK.D                          |                                      |
| 110   | 1             | 946.5120  | 85.13              | 2 | 23.1     | 83.8  | 0 | 226-241 | K.DTEEDFHVDQVTTVK.V                   |                                      |
| 50    | 1             | 710.4180  | 91.74              | 2 | 17.7     | 29.9  | 1 | 247-257 | K.RLGMFNIQHCK.K                       | Carbamidomethyl: 10;<br>Oxidation: 4 |
| 45    | 1             | 464.6170  | 103.47             | 3 | 17.2     | 30.3  | 1 | 248-258 | R.LGMFNIQHCKK.L                       | Carbamidomethyl: 9; Oxidation:<br>3  |
| 101   | 1             | 902.5780  | 104.59             | 2 | 22.5     | 78.9  | 0 | 284-298 | K.LQHLENELTHDIITK.F                   |                                      |
| 35    | 1             | 539.8020  | 64.03              | 2 | 16.4     | 30.3  | 1 | 299-306 | K.FLENEDRR.S                          |                                      |
| 48    | 1             | 426.7770  | 62.03              | 2 | 17.6     | 54.9  | 0 | 307-314 | R.SASLHLPK.L                          |                                      |
| 121   | 1             | 555.8900  | 151.68             | 2 | 24.2     | 78.8  | 0 | 315-324 | K.LSITGTDLK.S                         |                                      |
| 126   | 1             | 508.3890  | 153.55             | 2 | 25.1     | 81.8  | 0 | 325-334 | K.SVLGQLGITK.V                        |                                      |
| 156   | 1             | 918.0590  | 111.02             | 2 | 27.6     | 129.3 | 0 | 335-352 | K.VFSNGADLSGVTEEAPLK.L                | Deamidated: 4                        |
| 134   | 2             | 917.5520  | 94.74              | 2 | 26.1     | 114.5 | 0 | 335-352 | K.VFSNGADLSGVTEEAPLK.L                |                                      |
| 153   | 3             | 1082.1920 | 119.57             | 2 | 27.4     | 61.1  | 1 | 335-355 | K.VFSNGADLSGVTEEAPLKLSK.A             | Deamidated: 4                        |
| 73    | 1             | 444.7930  | 84.37              | 2 | 19.9     | 48.9  | 0 | 360-367 | K.AVLTIDEK.G                          |                                      |



## Accumulated Protein Report

|     |   |           |        |   |      |      |   |         |                                |                  |
|-----|---|-----------|--------|---|------|------|---|---------|--------------------------------|------------------|
| 193 | 1 | 1146.6390 | 497.76 | 2 | 32.2 | 36.1 | 0 | 368-389 | K.GTEAAGAMFLEAIPMSIPPEVK.<br>F | Oxidation: 8, 15 |
|-----|---|-----------|--------|---|------|------|---|---------|--------------------------------|------------------|

**Protein 3:** Haptoglobin OS=Homo sapiens GN=HP PE=1 SV=1  
**Accession:** HPT\_HUMAN **Score:** 56.88  
**Database:** SwissProt\_July2013 **MW [kDa]:** 45.20  
**Seq. Coverage [%]:** 2.70 % **pl:** 6.13  
**No. of Peptides:** 1

| Cmpd. | No. of Cmpds. | m/z meas. | $\Delta$ m/z [ppm] | z | Rt [min] | Score | P | Range   | Sequence        | Modification |
|-------|---------------|-----------|--------------------|---|----------|-------|---|---------|-----------------|--------------|
| 20    | 1             | 637.9010  | 123.22             | 2 | 14.6     | 56.9  | 1 | 312-322 | R.HYEGSTVPEKK.T |              |

**Search Type:** Combined MS/MS - ProteinExtractor  
**Search Result:** Amazon Human\_SPJuly2013\_2016-08-08 18:23:29  
**Search Location:** /Kathir/ABC 2016 IgG And A1AT/KA A1AT EtOH Drop 1min E2\_RD5\_01\_8299.d/

**Protein 1:** Serum albumin OS=Homo sapiens GN=ALB PE=1 SV=2  
**Accession:** ALBU\_HUMAN **Score:** 1645.74  
**Database:** SwissProt\_July2013 **MW [kDa]:** 69.30  
**Seq. Coverage [%]:** 45.60 % **pl:** 5.88  
**No. of Peptides:** 27

**Modification(s):** Carbamidomethyl, Oxidation

| Cmpd. | No. of Cmpds. | m/z meas. | $\Delta$ m/z [ppm] | z | Rt [min] | Score | P | Range   | Sequence          | Modification                            |
|-------|---------------|-----------|--------------------|---|----------|-------|---|---------|-------------------|-----------------------------------------|
| 15    | 1             | 575.3710  | 138.00             | 2 | 14.4     | 68.1  | 1 | 25-34   | R.DAHKSEVAHR.F    |                                         |
| 70    | 3             | 613.8540  | 77.83              | 2 | 19.7     | 75.5  | 1 | 35-44   | R.FKDLGEENFK.A    |                                         |
| 102   | 1             | 575.3790  | 117.94             | 2 | 22.9     | 75.4  | 0 | 66-75   | K.LVNEVTEFAK.T    |                                         |
| 31    | 1             | 749.8460  | 70.87              | 2 | 16.1     | 110.7 | 0 | 76-88   | K.TCVADESAENCDK.S | Carbamidomethyl: 2, 11                  |
| 45    | 1             | 725.8260  | 80.19              | 2 | 17.4     | 59.8  | 0 | 106-117 | R.ETYGEMADCCAQ.Q  | Carbamidomethyl: 9, 10;<br>Oxidation: 6 |
| 39    | 1             | 572.3160  | 79.72              | 3 | 17.0     | 23.5  | 1 | 118-130 | K.QEPERNECFLQHK.D | Carbamidomethyl: 8                      |

# Accumulated Protein Report



|     |   |          |        |   |      |       |   |         |                                 |                           |
|-----|---|----------|--------|---|------|-------|---|---------|---------------------------------|---------------------------|
| 68  | 1 | 879.4620 | 54.74  | 3 | 19.3 | 36.4  | 2 | 118-138 | K.QEPERNECFLQHKDDPNLPR.L        | Carbamidomethyl: 8        |
| 53  | 1 | 470.8180 | 191.66 | 2 | 18.1 | 35.8  | 0 | 131-138 | K.DDNPPLPR.L                    |                           |
| 72  | 1 | 528.3590 | 115.76 | 2 | 19.9 | 40.9  | 1 | 161-168 | K.KYLYEIAR.R                    |                           |
| 95  | 1 | 464.3190 | 147.85 | 2 | 22.3 | 48.0  | 0 | 162-168 | K.YLYEIAR.R                     |                           |
| 29  | 1 | 759.9500 | 76.92  | 2 | 15.9 | 67.4  | 2 | 206-219 | K.LDELREDEGKASSAK.Q             |                           |
| 80  | 1 | 418.2590 | 83.87  | 3 | 20.6 | 47.9  | 1 | 247-257 | R.FPKAEFAEVSK.L                 |                           |
| 58  | 1 | 696.2910 | 10.01  | 3 | 18.6 | 61.8  | 0 | 265-281 | K.VHTECCHGDLLECADDR.A           | Carbamidomethyl: 5, 6, 13 |
| 75  | 1 | 862.4330 | 64.44  | 3 | 20.1 | 61.4  | 1 | 265-286 | K.VHTECCHGDLLECADDRADLAK.Y      | Carbamidomethyl: 5, 6, 13 |
| 54  | 1 | 722.3710 | 64.16  | 2 | 18.3 | 74.8  | 0 | 287-298 | K.YICENQDSISSK.L                | Carbamidomethyl: 3        |
| 41  | 1 | 773.9930 | 117.56 | 2 | 17.0 | 61.5  | 1 | 299-310 | K.LKECCEKPLLEK.S                | Carbamidomethyl: 4, 5     |
| 179 | 1 | 992.1960 | 76.93  | 3 | 32.0 | 107.4 | 0 | 311-337 | K.SHCIAEVENDEMPADLPSLAADFVESK.D | Carbamidomethyl: 3        |
| 26  | 1 | 599.3340 | 86.67  | 2 | 15.8 | 37.2  | 1 | 338-347 | K.DVCKNYAEAK.D                  | Carbamidomethyl: 3        |
| 139 | 1 | 829.4760 | 115.79 | 2 | 27.1 | 85.7  | 0 | 414-426 | K.QNCELFEQLGEYK.F               | Carbamidomethyl: 3        |
| 99  | 1 | 480.8570 | 149.96 | 2 | 22.6 | 67.5  | 0 | 427-434 | K.FQNALLVR.Y                    |                           |
| 101 | 1 | 820.5510 | 95.66  | 2 | 22.8 | 83.9  | 1 | 438-452 | K.KVPQVSTPTLVEVSR.N             |                           |
| 14  | 1 | 515.3140 | 155.54 | 2 | 14.4 | 33.5  | 1 | 461-468 | K.CCKHPEAK.R                    | Carbamidomethyl: 1, 2     |
| 19  | 1 | 501.8420 | 118.47 | 2 | 15.1 | 37.0  | 1 | 491-499 | K.TPVSDRVTK.C                   |                           |
| 47  | 1 | 569.7920 | 69.13  | 2 | 17.7 | 50.2  | 0 | 500-508 | K.CCTESLVNR.R                   | Carbamidomethyl: 1, 2     |
| 76  | 2 | 564.9240 | 125.73 | 2 | 20.2 | 77.1  | 1 | 549-558 | K.KQTALVELVK.H                  |                           |
| 109 | 1 | 500.8830 | 154.75 | 2 | 23.8 | 58.3  | 0 | 550-558 | K.QTALVELVK.H                   |                           |
| 27  | 1 | 543.2780 | 56.83  | 3 | 15.8 | 59.2  | 2 | 585-598 | K.ADDKETCFAEEGKK.L              | Carbamidomethyl: 7        |

**Protein 2:** Alpha-1-antitrypsin OS=Homo sapiens GN=SERPINA1 PE=1 SV=3  
**Accession:** A1AT\_HUMAN **Score:** 1098.81  
**Database:** SwissProt\_July2013 **MW [kDa]:** 46.70  
**Seq. Coverage [%]:** 37.10 % **pI:** 5.27  
**No. of Peptides:** 19

**Modification(s):** Carbamidomethyl, Oxidation, Deamidated

| Cmpd. | No. of Cmpds. | m/z meas. | $\Delta$ m/z [ppm] | z | Rt [min] | Score | P | Range   | Sequence          | Modification |
|-------|---------------|-----------|--------------------|---|----------|-------|---|---------|-------------------|--------------|
| 22    | 1             | 890.4660  | 87.94              | 2 | 15.5     | 49.3  | 0 | 35-49   | K.TDTSHHQDHPFNK.I |              |
| 84    | 1             | 667.4710  | 121.48             | 2 | 20.9     | 69.6  | 2 | 150-160 | K.LVDKFLEDVKK.L   |              |
| 38    | 1             | 568.8550  | 95.03              | 2 | 16.8     | 73.2  | 1 | 179-187 | K.KQINDYVEK.G     |              |

# Accumulated Protein Report



|     |   |          |        |   |      |       |   |         |                        |                                      |
|-----|---|----------|--------|---|------|-------|---|---------|------------------------|--------------------------------------|
| 36  | 1 | 804.4970 | 91.97  | 2 | 16.7 | 81.2  | 2 | 179-192 | K.KQINDYVEKGTQGK.I     |                                      |
| 55  | 1 | 504.7990 | 90.21  | 2 | 18.3 | 43.2  | 0 | 180-187 | K.QINDYVEK.G           |                                      |
| 49  | 1 | 740.4250 | 66.81  | 2 | 17.8 | 38.6  | 1 | 180-192 | K.QINDYVEKGTQGK.I      |                                      |
| 60  | 1 | 638.3690 | 36.26  | 2 | 18.7 | 54.7  | 1 | 216-225 | K.GKWERPFEVK.D         |                                      |
| 78  | 1 | 545.8530 | 119.75 | 2 | 20.4 | 34.4  | 0 | 218-225 | K.WERPFEVK.D           |                                      |
| 104 | 1 | 946.5290 | 103.09 | 2 | 23.2 | 97.4  | 0 | 226-241 | K.DTEEDFHVDQVTTVK.V    |                                      |
| 51  | 1 | 473.9550 | 106.96 | 3 | 18.0 | 27.0  | 1 | 247-257 | K.RLGMFNIQHCK.K        | Carbamidomethyl: 10;<br>Oxidation: 4 |
| 62  | 1 | 632.3690 | 105.53 | 2 | 19.1 | 41.7  | 0 | 248-257 | R.LGMFNIQHCK.K         | Carbamidomethyl: 9; Oxidation:<br>3  |
| 43  | 1 | 464.6200 | 109.93 | 3 | 17.2 | 21.7  | 1 | 248-258 | R.LGMFNIQHCKK.L        | Carbamidomethyl: 9; Oxidation:<br>3  |
| 98  | 1 | 602.0400 | 80.57  | 3 | 22.6 | 50.0  | 0 | 284-298 | K.LQHLENELTHDITK.F     |                                      |
| 34  | 1 | 539.8030 | 65.89  | 2 | 16.4 | 32.6  | 1 | 299-306 | K.FLENEDRR.S           |                                      |
| 46  | 1 | 426.7700 | 45.63  | 2 | 17.6 | 48.8  | 0 | 307-314 | R.SASLHLPK.L           |                                      |
| 110 | 1 | 555.9050 | 178.67 | 2 | 24.3 | 79.3  | 0 | 315-324 | K.LSITGYDLK.S          |                                      |
| 118 | 1 | 508.4080 | 190.93 | 2 | 25.2 | 81.6  | 0 | 325-334 | K.SVLGQLGITK.V         |                                      |
| 148 | 1 | 918.0700 | 123.00 | 2 | 27.7 | 125.1 | 0 | 335-352 | K.VFSNGADLSGVTEEAPLK.L | Deamidated: 4                        |
| 73  | 1 | 444.8080 | 118.10 | 2 | 20.0 | 49.4  | 0 | 360-367 | K.AVLTIDEK.G           |                                      |

**Protein 3:** Ig kappa chain C region OS=Homo sapiens GN=IGKC PE=1 SV=1  
**Accession:** IGKC\_HUMAN **Score:** 128.24  
**Database:** SwissProt\_July2013 **MW [kDa]:** 11.60  
**Seq. Coverage [%]:** 32.10 % **pI:** 5.53  
**No. of Peptides:** 1

| Cmpd. | No. of Cmpds. | m/z meas. | Δ m/z [ppm] | z | Rt [min] | Score | P | Range | Sequence                                  | Modification |
|-------|---------------|-----------|-------------|---|----------|-------|---|-------|-------------------------------------------|--------------|
| 130   | 1             | 1207.2820 | 33.72       | 3 | 26.1     | 128.2 | 1 | 42-75 | K.VDNALQSGNSQESVTEQDSKDST<br>YLSSTLTLSK.A |              |

**Protein 4:** Ig gamma-1 chain C region OS=Homo sapiens GN=IGHG1 PE=1 SV=1  
**Accession:** IGHG1\_HUMAN **Score:** 126.88  
**Database:** SwissProt\_July2013 **MW [kDa]:** 36.10  
**Seq. Coverage [%]:** 6.70 % **pI:** 9.36



## Accumulated Protein Report

No. of Peptides: 1

Modification(s): Carbamidomethyl, Deamidated

| Cmpd. | No. of Cmpds. | m/z meas. | $\Delta$ m/z [ppm] | z | Rt [min] | Score | P | Range   | Sequence                       | Modification   |
|-------|---------------|-----------|--------------------|---|----------|-------|---|---------|--------------------------------|----------------|
| 170   | 1             | 1273.0750 | 10.74              | 2 | 30.3     | 102.2 | 0 | 254-275 | K.GFYPSDIAVEWESNGQPENNYK.<br>T | Deamidated: 14 |

Protein 5: Haptoglobin OS=Homo sapiens GN=HP PE=1 SV=1

Accession: HPT\_HUMAN

Database: SwissProt\_July2013

Seq. Coverage [%]: 2.70 %

Score: 48.84

MW [kDa]: 45.20

pI: 6.13

No. of Peptides: 1

| Cmpd. | No. of Cmpds. | m/z meas. | $\Delta$ m/z [ppm] | z | Rt [min] | Score | P | Range   | Sequence        | Modification |
|-------|---------------|-----------|--------------------|---|----------|-------|---|---------|-----------------|--------------|
| 16    | 1             | 637.9110  | 138.90             | 2 | 14.7     | 48.8  | 1 | 312-322 | R.HYEGSTVPEKK.T |              |

Search Type Combined MS/MS - ProteinExtractor

Search Result Amazon Human\_SPJuly2013\_2016-08-08 18:23:29

Search Location /Kathir/ABC 2016 IgG And A1AT/KA A1AT EtOH Drop 1min E3\_RD6\_01\_8283.d/

Protein 1: Serum albumin OS=Homo sapiens GN=ALB PE=1 SV=2

Accession: ALBU\_HUMAN

Database: SwissProt\_July2013

Seq. Coverage [%]: 56.70 %

Score: 2114.60

MW [kDa]: 69.30

pI: 5.88

No. of Peptides: 34

Modification(s): Carbamidomethyl, Oxidation, Deamidated

| Cmpd. | No. of Cmpds. | m/z meas. | $\Delta$ m/z [ppm] | z | Rt [min] | Score | P | Range | Sequence       | Modification |
|-------|---------------|-----------|--------------------|---|----------|-------|---|-------|----------------|--------------|
| 9     | 1             | 575.3510  | 103.23             | 2 | 14.5     | 58.3  | 1 | 25-34 | R.DAHKSEVAHR.F |              |

# Accumulated Protein Report



|     |   |           |        |   |      |       |   |         |                                    |                                      |
|-----|---|-----------|--------|---|------|-------|---|---------|------------------------------------|--------------------------------------|
| 63  | 2 | 613.8680  | 100.64 | 2 | 19.7 | 75.5  | 1 | 35-44   | R.FKDLGEENFK.A                     |                                      |
| 104 | 1 | 575.3760  | 112.73 | 2 | 22.9 | 72.0  | 0 | 66-75   | K.LVNEVTEFAK.T                     |                                      |
| 23  | 1 | 749.8490  | 74.87  | 2 | 16.0 | 106.7 | 0 | 76-88   | K.TCVADESAENCDK.S                  | Carbamidomethyl: 2, 11               |
| 136 | 1 | 1138.2820 | 361.40 | 3 | 26.3 | 51.6  | 2 | 76-105  | K.TCVADESAENCDKSLHTLFGDKLCTVATLR.E | Carbamidomethyl: 2, 11, 24           |
| 38  | 1 | 725.8180  | 69.16  | 2 | 17.2 | 66.1  | 0 | 106-117 | R.ETYGEMADCCAK.Q                   | Carbamidomethyl: 9, 10; Oxidation: 6 |
| 33  | 1 | 572.3160  | 79.72  | 3 | 16.9 | 27.1  | 1 | 118-130 | K.QEPERNECFLQHK.D                  | Carbamidomethyl: 8                   |
| 67  | 4 | 659.8570  | 67.88  | 4 | 19.9 | 30.6  | 2 | 118-138 | K.QEPERNECFLQHKDDNPPLPR.L          | Carbamidomethyl: 8                   |
| 61  | 1 | 666.3630  | 72.57  | 3 | 19.5 | 52.2  | 1 | 123-138 | R.NECFLQHKDDNPPLPR.L               | Carbamidomethyl: 3                   |
| 47  | 1 | 470.7870  | 125.80 | 2 | 18.0 | 52.2  | 0 | 131-138 | K.DDNPPLPR.L                       |                                      |
| 66  | 1 | 528.3550  | 108.19 | 2 | 19.8 | 48.3  | 1 | 161-168 | K.KYLYEIAR.R                       |                                      |
| 94  | 1 | 464.3210  | 152.16 | 2 | 22.2 | 48.0  | 0 | 162-168 | K.YLYEIAR.R                        |                                      |
| 21  | 1 | 759.9530  | 80.86  | 2 | 15.9 | 58.5  | 2 | 206-219 | K.LDELRDEGKASSAK.Q                 |                                      |
| 52  | 1 | 696.3040  | 28.68  | 3 | 18.5 | 76.6  | 0 | 265-281 | K.VHTECCHGDLLECADDR.A              | Carbamidomethyl: 5, 6, 13            |
| 70  | 2 | 862.4450  | 78.36  | 3 | 20.1 | 60.7  | 1 | 265-286 | K.VHTECCHGDLLECADDRADLAK.Y         | Carbamidomethyl: 5, 6, 13            |
| 48  | 1 | 722.3780  | 73.85  | 2 | 18.2 | 94.7  | 0 | 287-298 | K.YICENQDSISSK.L                   | Carbamidomethyl: 3                   |
| 35  | 1 | 773.9810  | 102.06 | 2 | 17.0 | 53.4  | 1 | 299-310 | K.LKECCEKPLLEK.S                   | Carbamidomethyl: 4, 5                |
| 186 | 4 | 997.5490  | 97.93  | 3 | 30.7 | 100.3 | 0 | 311-337 | K.SHCIAEVENDEMPADLPSLAADFVESK.D    | Carbamidomethyl: 3; Oxidation: 12    |
| 194 | 1 | 992.2120  | 93.06  | 3 | 31.9 | 121.2 | 0 | 311-337 | K.SHCIAEVENDEMPADLPSLAADFVESK.D    | Carbamidomethyl: 3                   |
| 18  | 1 | 599.3160  | 56.63  | 2 | 15.8 | 32.0  | 1 | 338-347 | K.DVCKNYAEAK.D                     | Carbamidomethyl: 3                   |
| 120 | 1 | 490.0390  | 176.47 | 3 | 24.6 | 70.4  | 1 | 361-372 | R.RHPDYSVLLLLR.L                   |                                      |
| 182 | 1 | 1023.1810 | 126.76 | 2 | 29.7 | 68.8  | 0 | 397-413 | K.VFDEFKPLVEEPQNLIK.Q              |                                      |
| 181 | 1 | 682.7900  | 134.79 | 3 | 29.6 | 47.5  | 0 | 397-413 | K.VFDEFKPLVEEPQNLIK.Q              | Deamidated: 13                       |
| 144 | 1 | 829.4760  | 115.79 | 2 | 27.0 | 88.6  | 0 | 414-426 | K.QNCELFEQLGEYK.F                  | Carbamidomethyl: 3                   |
| 103 | 1 | 820.5430  | 85.91  | 2 | 22.7 | 81.3  | 1 | 438-452 | K.KVPQVSTPTLVEVSR.N                |                                      |
| 13  | 1 | 501.8320  | 98.54  | 2 | 15.0 | 35.6  | 1 | 491-499 | K.TPVSDRVTK.C                      |                                      |
| 41  | 1 | 569.7940  | 72.64  | 2 | 17.6 | 47.0  | 0 | 500-508 | K.CCTESLVNR.R                      | Carbamidomethyl: 1, 2                |
| 125 | 1 | 637.7220  | 114.89 | 3 | 25.3 | 78.7  | 0 | 509-524 | R.RPCFSALVDETYVPK.E                | Carbamidomethyl: 3                   |
| 143 | 1 | 849.1570  | 113.88 | 3 | 26.8 | 75.0  | 1 | 525-545 | K.EFNAETFTFHADICTLSEKER.Q          | Carbamidomethyl: 14                  |
| 73  | 1 | 564.9190  | 116.88 | 2 | 20.2 | 68.4  | 1 | 549-558 | K.QTALVELVK.H                      |                                      |
| 113 | 1 | 500.8720  | 132.79 | 2 | 23.7 | 52.7  | 0 | 550-558 | K.QTALVELVK.H                      |                                      |
| 32  | 1 | 750.3710  | 68.54  | 2 | 16.8 | 60.1  | 1 | 585-597 | K.ADDKETCFAEEGK.K                  | Carbamidomethyl: 7                   |
| 19  | 1 | 543.2810  | 62.35  | 3 | 15.8 | 69.7  | 2 | 585-598 | K.ADDKETCFAEEGKK.L                 | Carbamidomethyl: 7                   |



## Accumulated Protein Report

|     |   |           |        |   |      |      |   |         |                 |  |
|-----|---|-----------|--------|---|------|------|---|---------|-----------------|--|
| 157 | 1 | 1013.7670 | 165.77 | 1 | 28.0 | 32.5 | 0 | 599-609 | K.LVAASQAALGL.- |  |
|-----|---|-----------|--------|---|------|------|---|---------|-----------------|--|

**Protein 2:** Alpha-1-antitrypsin OS=Homo sapiens GN=SERPINA1 PE=1 SV=3  
**Accession:** A1AT\_HUMAN **Score:** 1878.47  
**Database:** SwissProt\_July2013 **MW [kDa]:** 46.70  
**Seq. Coverage [%]:** 52.90 % **pl:** 5.27  
**No. of Peptides:** 28

**Modification(s):** Carbamidomethyl, Oxidation, Deamidated

| Cmpd. | No. of Cmpds. | m/z meas. | $\Delta$ m/z [ppm] | z | Rt [min] | Score | P | Range   | Sequence                             | Modification                         |
|-------|---------------|-----------|--------------------|---|----------|-------|---|---------|--------------------------------------|--------------------------------------|
| 11    | 1             | 593.9650  | 63.04              | 3 | 14.8     | 53.5  | 0 | 35-49   | K.TDTSHHDQDHPTFNK.I                  |                                      |
| 177   | 1             | 851.4810  | 84.68              | 4 | 29.4     | 46.5  | 1 | 35-63   | K.TDTSHHDQDHPTFNKIPNLAEF<br>AFSLYR.Q |                                      |
| 195   | 1             | 1288.2210 | 42.59              | 2 | 32.2     | 124.3 | 0 | 126-149 | R.TLNQPDSQLQLTTGNGLFLSEGL<br>K.L     | Deamidated: 15                       |
| 108   | 1             | 603.4150  | 120.25             | 2 | 23.3     | 41.0  | 1 | 150-159 | K.LVDKFLEDVK.K                       |                                      |
| 82    | 1             | 667.4640  | 110.99             | 2 | 20.9     | 71.3  | 2 | 150-160 | K.LVDKFLEDVKK.L                      |                                      |
| 86    | 1             | 772.1180  | 88.27              | 3 | 21.2     | 95.1  | 2 | 160-179 | K.KLYHSEFTVNFVDTEEAKK.Q              |                                      |
| 121   | 1             | 686.7310  | 113.29             | 3 | 24.7     | 62.9  | 0 | 161-178 | K.LYHSEFTVNFVDTEEAK.K                |                                      |
| 100   | 1             | 729.3990  | 65.08              | 3 | 22.6     | 65.5  | 1 | 161-179 | K.LYHSEFTVNFVDTEEAKK.Q               |                                      |
| 31    | 1             | 568.8620  | 107.34             | 2 | 16.8     | 68.4  | 1 | 179-187 | K.KQINDYVEK.G                        |                                      |
| 29    | 1             | 804.5020  | 98.18              | 2 | 16.6     | 90.1  | 2 | 179-192 | K.KQINDYVEKGTQGK.I                   |                                      |
| 49    | 1             | 504.8070  | 106.06             | 2 | 18.2     | 40.9  | 0 | 180-187 | K.QINDYVEK.G                         |                                      |
| 42    | 1             | 740.4250  | 66.81              | 2 | 17.7     | 40.5  | 1 | 180-192 | K.QINDYVEKGTQGK.I                    |                                      |
| 54    | 1             | 638.3730  | 42.52              | 2 | 18.7     | 43.9  | 1 | 216-225 | K.GKWERPFEVK.D                       |                                      |
| 112   | 1             | 1050.2620 | 79.12              | 3 | 23.7     | 114.6 | 2 | 216-241 | K.GKWERPFEVKDTEEEEDFHVDQVT<br>TVK.V  |                                      |
| 76    | 1             | 545.8510  | 116.09             | 2 | 20.4     | 34.4  | 0 | 218-225 | K.WERPFEVK.D                         |                                      |
| 106   | 1             | 946.5000  | 72.45              | 2 | 23.1     | 88.4  | 0 | 226-241 | K.DTEEEEDFHVDQVTTVK.V                |                                      |
| 45    | 1             | 473.9490  | 94.30              | 3 | 17.8     | 23.3  | 1 | 247-257 | K.RLGMFNIQHCK.K                      | Carbamidomethyl: 10;<br>Oxidation: 4 |
| 37    | 1             | 464.6230  | 116.39             | 3 | 17.1     | 26.4  | 1 | 248-258 | R.LGMFNIQHCKK.L                      | Carbamidomethyl: 9; Oxidation:<br>3  |
| 99    | 1             | 902.5740  | 100.16             | 2 | 22.6     | 105.2 | 0 | 284-298 | K.LQHLENELTHDIITK.F                  |                                      |
| 26    | 1             | 539.7990  | 58.47              | 2 | 16.3     | 33.8  | 1 | 299-306 | K.FLENEDRR.S                         |                                      |



# Accumulated Protein Report

|     |   |           |        |   |      |       |   |         |                           |               |
|-----|---|-----------|--------|---|------|-------|---|---------|---------------------------|---------------|
| 40  | 1 | 426.7840  | 78.44  | 2 | 17.6 | 46.8  | 0 | 307-314 | R.SASLHLPK.L              |               |
| 117 | 1 | 555.8970  | 164.27 | 2 | 24.2 | 81.2  | 0 | 315-324 | K.LSITGTYDLK.S            |               |
| 122 | 1 | 508.4020  | 179.12 | 2 | 25.1 | 78.7  | 0 | 325-334 | K.SVLGQLGITK.V            |               |
| 155 | 1 | 918.0500  | 101.22 | 2 | 27.6 | 121.6 | 0 | 335-352 | K.VFSNGADLSGVTEEAPLK.L    | Deamidated: 4 |
| 134 | 2 | 917.5630  | 106.73 | 2 | 26.2 | 113.8 | 0 | 335-352 | K.VFSNGADLSGVTEEAPLK.L    |               |
| 135 | 1 | 721.4780  | 131.93 | 3 | 26.2 | 68.1  | 1 | 335-355 | K.VFSNGADLSGVTEEAPLKLSK.A |               |
| 154 | 1 | 1082.1870 | 114.95 | 2 | 27.5 | 58.1  | 1 | 335-355 | K.VFSNGADLSGVTEEAPLKLSK.A | Deamidated: 4 |
| 156 | 1 | 624.7460  | 133.95 | 3 | 27.8 | 39.9  | 0 | 390-404 | K.FNKPFVFLMIEQNTK.S       | Oxidation: 9  |

**Protein 3:** Haptoglobin OS=Homo sapiens GN=HP PE=1 SV=1  
**Accession:** HPT\_HUMAN **Score:** 56.94  
**Database:** SwissProt\_July2013 **MW [kDa]:** 45.20  
**Seq. Coverage [%]:** 2.70 % **pI:** 6.13  
**No. of Peptides:** 1

| Cmpd. | No. of Cmpds. | m/z meas. | $\Delta$ m/z [ppm] | z | Rt [min] | Score | P | Range   | Sequence        | Modification |
|-------|---------------|-----------|--------------------|---|----------|-------|---|---------|-----------------|--------------|
| 10    | 1             | 637.8810  | 91.86              | 2 | 14.6     | 56.9  | 1 | 312-322 | R.HYEGSTVPEKK.T |              |

**Search Type:** Combined MS/MS - ProteinExtractor  
**Search Result:** Amazon Human\_SPJuly2013\_2016-08-08 18:23:29  
**Search Location:** /Kathir/ABC 2016 IgG And A1AT/KA A1AT ISo Drop 1min E1\_RC6\_01\_8275.d/

**Protein 1:** Alpha-1-antitrypsin OS=Homo sapiens GN=SERPINA1 PE=1 SV=3  
**Accession:** A1AT\_HUMAN **Score:** 2109.44  
**Database:** SwissProt\_July2013 **MW [kDa]:** 46.70  
**Seq. Coverage [%]:** 61.20 % **pI:** 5.27  
**No. of Peptides:** 34

**Modification(s):** Carbamidomethyl, Oxidation, Deamidated

| Cmpd. | No. of Cmpds. | m/z meas. | $\Delta$ m/z [ppm] | z | Rt [min] | Score | P | Range | Sequence | Modification |
|-------|---------------|-----------|--------------------|---|----------|-------|---|-------|----------|--------------|
|-------|---------------|-----------|--------------------|---|----------|-------|---|-------|----------|--------------|



# Accumulated Protein Report



|     |   |           |        |   |      |       |   |         |                                    |                                      |
|-----|---|-----------|--------|---|------|-------|---|---------|------------------------------------|--------------------------------------|
| 5   | 1 | 890.4240  | 40.77  | 2 | 14.8 | 57.1  | 0 | 35-49   | K.TDTSHTDQDHPFNK.I                 |                                      |
| 214 | 1 | 821.5330  | 118.82 | 2 | 33.9 | 89.8  | 0 | 50-63   | K.ITPNLAFAFSLYR.Q                  |                                      |
| 198 | 1 | 1288.2100 | 34.05  | 2 | 32.1 | 135.7 | 0 | 126-149 | R.TLNQPDSQLQLTTGNGLFLSEGL<br>K.L   | Deamidated: 15                       |
| 199 | 1 | 859.1410  | 32.38  | 3 | 32.2 | 29.5  | 0 | 126-149 | R.TLNQPDSQLQLTTGNGLFLSEGL<br>K.L   | Deamidated: 3                        |
| 189 | 2 | 1287.7170 | 33.30  | 2 | 31.2 | 123.5 | 0 | 126-149 | R.TLNQPDSQLQLTTGNGLFLSEGL<br>K.L   |                                      |
| 96  | 1 | 603.4080  | 108.65 | 2 | 23.1 | 34.1  | 1 | 150-159 | K.LVDKFLEDVK.K                     |                                      |
| 72  | 1 | 667.4140  | 36.07  | 2 | 21.0 | 73.1  | 2 | 150-160 | K.LVDKFLEDVKK.L                    |                                      |
| 77  | 4 | 772.1070  | 74.02  | 3 | 21.3 | 93.1  | 2 | 160-179 | K.KLYHSEFTVNFVDTEEAKK.Q            |                                      |
| 117 | 1 | 686.7180  | 94.36  | 3 | 24.7 | 55.8  | 0 | 161-178 | K.LYHSEFTVNFVDTEEAK.K              |                                      |
| 90  | 2 | 729.3820  | 41.78  | 3 | 22.6 | 53.9  | 1 | 161-179 | K.LYHSEFTVNFVDTEEAKK.Q             |                                      |
| 24  | 1 | 568.8590  | 102.06 | 2 | 16.8 | 70.8  | 1 | 179-187 | K.KQINDYVEK.G                      |                                      |
| 21  | 1 | 536.6650  | 88.01  | 3 | 16.6 | 54.3  | 2 | 179-192 | K.KQINDYVEKGTQGK.I                 |                                      |
| 41  | 1 | 504.8040  | 100.12 | 2 | 18.2 | 40.5  | 0 | 180-187 | K.QINDYVEK.G                       |                                      |
| 35  | 1 | 740.4000  | 33.04  | 2 | 17.8 | 45.7  | 1 | 180-192 | K.QINDYVEKGTQGK.I                  |                                      |
| 48  | 1 | 638.3650  | 29.99  | 2 | 18.7 | 46.1  | 1 | 216-225 | K.GKWERPFEVK.D                     |                                      |
| 105 | 1 | 787.9450  | 74.88  | 4 | 23.7 | 62.0  | 2 | 216-241 | K.GKWERPFEVKDTEEEDFHVDQVT<br>TVK.V |                                      |
| 65  | 1 | 545.8490  | 112.42 | 2 | 20.4 | 32.8  | 0 | 218-225 | K.WERPFEVK.D                       |                                      |
| 94  | 1 | 946.4960  | 68.22  | 2 | 23.1 | 88.3  | 0 | 226-241 | K.DTEEEDFHVDQVTTVK.V               |                                      |
| 103 | 2 | 837.4510  | 77.99  | 3 | 23.6 | 77.3  | 1 | 226-246 | K.DTEEEDFHVDQVTTVKVPMMK.R          | Oxidation: 19, 20                    |
| 87  | 1 | 889.4940  | 83.88  | 3 | 22.3 | 50.9  | 2 | 226-247 | K.DTEEEDFHVDQVTTVKVPMMKR.<br>L     | Oxidation: 19, 20                    |
| 37  | 2 | 473.9550  | 106.96 | 3 | 18.0 | 21.9  | 1 | 247-257 | K.RLGMFNIQHCK.K                    | Carbamidomethyl: 10;<br>Oxidation: 4 |
| 30  | 1 | 464.6210  | 112.08 | 3 | 17.2 | 31.2  | 1 | 248-258 | R.LGMFNIQHCKK.L                    | Carbamidomethyl: 9; Oxidation:<br>3  |
| 89  | 1 | 602.0440  | 87.22  | 3 | 22.6 | 63.5  | 0 | 284-298 | K.LQHLENELTHDIITK.F                |                                      |
| 19  | 1 | 539.7990  | 58.47  | 2 | 16.4 | 31.1  | 1 | 299-306 | K.FLENEDRR.S                       |                                      |
| 32  | 1 | 426.7620  | 26.88  | 2 | 17.6 | 58.5  | 0 | 307-314 | R.SASLHLPK.L                       |                                      |
| 110 | 1 | 555.8710  | 117.49 | 2 | 24.2 | 83.2  | 0 | 315-324 | K.LSITGTYDLK.S                     |                                      |
| 120 | 1 | 508.3850  | 145.68 | 2 | 25.1 | 81.8  | 0 | 325-334 | K.SVLGQLGITK.V                     |                                      |
| 155 | 1 | 918.0400  | 90.32  | 2 | 27.7 | 118.8 | 0 | 335-352 | K.VFSNGADLSGVTEEAPLK.L             | Deamidated: 4                        |
| 153 | 1 | 1082.1790 | 107.56 | 2 | 27.5 | 63.0  | 1 | 335-355 | K.VFSNGADLSGVTEEAPLKLSK.A          | Deamidated: 4                        |



## Accumulated Protein Report

|     |   |           |        |   |      |      |   |         |                                        |                    |
|-----|---|-----------|--------|---|------|------|---|---------|----------------------------------------|--------------------|
| 135 | 2 | 721.4630  | 111.13 | 3 | 26.3 | 55.3 | 1 | 335-355 | K.VFSNGADLSGVTEEAPLKLSK.A              |                    |
| 200 | 1 | 1054.2790 | 65.40  | 3 | 32.2 | 47.5 | 1 | 360-389 | K.AVLTIDEKGTEAAGAMFLEAIPM<br>SIPPEVK.F | Oxidation: 16, 23  |
| 192 | 2 | 1146.1320 | 55.38  | 2 | 31.4 | 69.0 | 0 | 368-389 | K.GTEAAGAMFLEAIPMSIPPEVK.<br>F         | Oxidation: 8, 15   |
| 151 | 1 | 936.6050  | 122.96 | 2 | 27.3 | 71.0 | 0 | 390-404 | K.FNKPFVFLMIEQNTK.S                    | Oxidation: 9       |
| 152 | 1 | 620.0590  | 116.62 | 3 | 27.3 | 28.9 | 0 | 390-404 | K.FNKPFVFLMIEQNTK.S                    | Deamidated: 12, 13 |

**Protein 2:** Serum albumin OS=Homo sapiens GN=ALB PE=1 SV=2  
**Accession:** ALBU\_HUMAN **Score:** 2076.92  
**Database:** SwissProt\_July2013 **MW [kDa]:** 69.30  
**Seq. Coverage [%]:** 63.40 % **pI:** 5.88  
**No. of Peptides:** 33

**Modification(s):** Carbamidomethyl, Oxidation, Deamidated

| Cmpd. | No. of Cmpds. | m/z meas. | $\Delta$ m/z [ppm] | z | Rt [min] | Score | P | Range   | Sequence                               | Modification                                         |
|-------|---------------|-----------|--------------------|---|----------|-------|---|---------|----------------------------------------|------------------------------------------------------|
| 1     | 1             | 575.3760  | 146.69             | 2 | 14.4     | 58.9  | 1 | 25-34   | R.DAHKSEVAHR.F                         |                                                      |
| 56    | 1             | 613.8590  | 85.98              | 2 | 19.8     | 75.4  | 1 | 35-44   | R.FKDLGEENFK.A                         |                                                      |
| 15    | 1             | 749.8370  | 58.87              | 2 | 16.1     | 102.5 | 0 | 76-88   | K.TCVADESAENCDK.S                      | Carbamidomethyl: 2, 11                               |
| 138   | 2             | 1138.2430 | 38.86              | 3 | 26.6     | 62.7  | 2 | 76-105  | K.TCVADESAENCDKSLHTLFGDKL<br>CTVATLR.E | Carbamidomethyl: 2, 11, 24;<br>Deamidated: 10        |
| 20    | 1             | 725.8110  | 59.52              | 2 | 16.5     | 59.7  | 0 | 106-117 | R.ETYGEMADCCAK.Q                       | Carbamidomethyl: 9, 10;<br>Oxidation: 6              |
| 29    | 1             | 572.3250  | 95.45              | 3 | 17.2     | 25.2  | 1 | 118-130 | K.QEPERNECFLQHK.D                      | Carbamidomethyl: 8                                   |
| 54    | 1             | 879.4650  | 58.15              | 3 | 19.5     | 22.7  | 2 | 118-138 | K.QEPERNECFLQHKDDPNLPR.L               | Carbamidomethyl: 8                                   |
| 38    | 1             | 470.7700  | 89.69              | 2 | 18.0     | 49.0  | 0 | 131-138 | K.DDNPDLPR.L                           |                                                      |
| 106   | 3             | 699.4130  | 98.77              | 4 | 23.8     | 49.3  | 1 | 139-161 | R.LVRPEVDVMCTAFHDNEETFLKK<br>.Y        | Carbamidomethyl: 10;<br>Oxidation: 9                 |
| 118   | 1             | 699.7710  | 258.83             | 4 | 24.8     | 28.7  | 1 | 139-161 | R.LVRPEVDVMCTAFHDNEETFLKK<br>.Y        | Carbamidomethyl: 10;<br>Oxidation: 9; Deamidated: 16 |
| 57    | 1             | 528.3570  | 111.98             | 2 | 19.9     | 37.8  | 1 | 161-168 | K.KYLYEIAR.R                           |                                                      |
| 176   | 1             | 633.7640  | 148.47             | 3 | 29.5     | 76.4  | 1 | 169-183 | R.RHPYFYAPPELLFFAK.R                   |                                                      |
| 115   | 1             | 709.0670  | 93.54              | 3 | 24.6     | 74.9  | 1 | 187-205 | K.AAFTECCQAADKAACLLPK.L                | Carbamidomethyl: 6, 7, 15                            |
| 13    | 1             | 759.9500  | 76.92              | 2 | 15.9     | 55.5  | 2 | 206-219 | K.LDELDRDEGKASSAK.Q                    |                                                      |
| 18    | 1             | 438.2870  | 64.99              | 2 | 16.3     | 26.8  | 1 | 243-249 | R.LSQRFPK.A                            |                                                      |
| 46    | 1             | 696.3030  | 27.25              | 3 | 18.6     | 56.7  | 0 | 265-281 | K.VHTECCCHGDLLECADDR.A                 | Carbamidomethyl: 5, 6, 13                            |

# Accumulated Protein Report



|     |   |          |        |   |      |       |   |         |                                  |                                                  |
|-----|---|----------|--------|---|------|-------|---|---------|----------------------------------|--------------------------------------------------|
| 63  | 2 | 862.4430 | 76.04  | 3 | 20.2 | 73.3  | 1 | 265-286 | K.VHTECCHGDLLECADDRDLAK.Y        | Carbamidomethyl: 5, 6, 13                        |
| 39  | 1 | 722.3660 | 57.24  | 2 | 18.2 | 89.2  | 0 | 287-298 | K.YICENQDSISSK.L                 | Carbamidomethyl: 3                               |
| 27  | 1 | 773.9780 | 98.18  | 2 | 17.0 | 61.4  | 1 | 299-310 | K.LKECCEKPLLEK.S                 | Carbamidomethyl: 4, 5                            |
| 191 | 4 | 997.5310 | 79.89  | 3 | 31.4 | 105.8 | 0 | 311-337 | K.SHCIAEVENDEMPADLPSLAADF VESK.D | Carbamidomethyl: 3; Oxidation: 12                |
| 184 | 2 | 997.8720 | 92.89  | 3 | 30.5 | 89.8  | 0 | 311-337 | K.SHCIAEVENDEMPADLPSLAADF VESK.D | Carbamidomethyl: 3; Oxidation: 12; Deamidated: 9 |
| 202 | 2 | 992.5280 | 411.57 | 3 | 32.4 | 94.2  | 0 | 311-337 | K.SHCIAEVENDEMPADLPSLAADF VESK.D | Carbamidomethyl: 3                               |
| 10  | 1 | 599.3260 | 73.32  | 2 | 15.7 | 35.5  | 1 | 338-347 | K.DVCKNYAEAK.D                   | Carbamidomethyl: 3                               |
| 116 | 1 | 490.0320 | 162.18 | 3 | 24.6 | 73.1  | 1 | 361-372 | R.RHPDYSVLLLLR.L                 |                                                  |
| 179 | 1 | 682.4350 | 95.29  | 3 | 29.7 | 60.2  | 0 | 397-413 | K.VFDEFKPLVEEPQNLIK.Q            |                                                  |
| 147 | 1 | 829.4650 | 102.53 | 2 | 27.0 | 93.9  | 0 | 414-426 | K.QNCELFEQLGEYK.F                | Carbamidomethyl: 3                               |
| 186 | 1 | 867.1790 | 86.54  | 3 | 31.0 | 61.0  | 1 | 414-434 | K.QNCELFEQLGEYKFQNALLVR.Y        | Carbamidomethyl: 3                               |
| 92  | 1 | 820.5280 | 67.63  | 2 | 22.7 | 63.1  | 1 | 438-452 | K.KVPQVSTPTLVEVSR.N              |                                                  |
| 7   | 1 | 501.8200 | 74.62  | 2 | 15.0 | 35.1  | 1 | 491-499 | K.TPVSDRVTK.C                    |                                                  |
| 122 | 1 | 956.0700 | 105.15 | 2 | 25.2 | 86.0  | 0 | 509-524 | R.RPCFSALEVDETYVPK.E             | Carbamidomethyl: 3                               |
| 142 | 1 | 849.1520 | 107.99 | 3 | 26.8 | 58.1  | 1 | 525-545 | K.EFNAETFTFHADICTLSEKER.Q        | Carbamidomethyl: 14                              |
| 64  | 1 | 564.9200 | 118.65 | 2 | 20.2 | 71.3  | 1 | 549-558 | K.QQTALVELVK.H                   |                                                  |
| 12  | 1 | 814.4100 | 52.74  | 2 | 15.8 | 76.7  | 2 | 585-598 | K.ADDKETCFAEEGKK.L               | Carbamidomethyl: 7                               |

**Protein 3:** Haptoglobin OS=Homo sapiens GN=HP PE=1 SV=1  
**Accession:** HPT\_HUMAN **Score:** 65.76  
**Database:** SwissProt\_July2013 **MW [kDa]:** 45.20  
**Seq. Coverage [%]:** 2.70 % **pl:** 6.13  
**No. of Peptides:** 1

| Cmpd. | No. of Cmpds. | m/z meas. | Δ m/z [ppm] | z | Rt [min] | Score | P | Range   | Sequence        | Modification |
|-------|---------------|-----------|-------------|---|----------|-------|---|---------|-----------------|--------------|
| 3     | 1             | 637.9140  | 143.60      | 2 | 14.6     | 65.8  | 1 | 312-322 | R.HYEGSTVPEKK.T |              |

**Search Type** Combined MS/MS - ProteinExtractor  
**Search Result** Amazon Human\_SPJuly2013\_2016-08-08 18:23:29



## Accumulated Protein Report

**Search Location** /Kathir/ABC 2016 IgG And A1AT/KA A1AT ISo Drop 1min E2\_RC7\_01\_8276.d/

**Protein 1:** Alpha-1-antitrypsin OS=Homo sapiens GN=SERPINA1 PE=1 SV=3  
**Accession:** A1AT\_HUMAN **Score:** 2345.01  
**Database:** SwissProt\_July2013 **MW [kDa]:** 46.70  
**Seq. Coverage [%]:** 61.20 % **pl:** 5.27  
**Modification(s):** Carbamidomethyl, Oxidation, Deamidated **No. of Peptides:** 33

| Cmpd. | No. of Cmpds. | m/z meas. | $\Delta$ m/z [ppm] | z | Rt [min] | Score | P | Range   | Sequence                            | Modification                         |
|-------|---------------|-----------|--------------------|---|----------|-------|---|---------|-------------------------------------|--------------------------------------|
| 3     | 2             | 890.4180  | 34.03              | 2 | 14.7     | 68.9  | 0 | 35-49   | K.TDTSHHQDHPFNK.I                   |                                      |
| 214   | 1             | 821.5290  | 113.95             | 2 | 34.0     | 95.1  | 0 | 50-63   | K.ITPNLAEFASFSLYR.Q                 |                                      |
| 200   | 1             | 1288.2000 | 26.29              | 2 | 32.1     | 150.2 | 0 | 126-149 | R.TLNQPDSQLQLTTGNGLFLSEGL<br>K.L    | Deamidated: 15                       |
| 190   | 2             | 1287.7120 | 29.41              | 2 | 31.2     | 121.5 | 0 | 126-149 | R.TLNQPDSQLQLTTGNGLFLSEGL<br>K.L    |                                      |
| 69    | 1             | 667.4160  | 39.07              | 2 | 21.0     | 66.8  | 2 | 150-160 | K.LVDKFLEDVKK.L                     |                                      |
| 72    | 3             | 772.1000  | 64.95              | 3 | 21.2     | 90.8  | 2 | 160-179 | K.KLYHSEFTVNFQDTEEAKK.Q             |                                      |
| 115   | 1             | 1029.5720 | 93.08              | 2 | 24.8     | 122.5 | 0 | 161-178 | K.LYHSEFTVNFQDTEEAK.K               |                                      |
| 94    | 1             | 1093.5890 | 59.75              | 2 | 22.9     | 71.5  | 1 | 161-179 | K.LYHSEFTVNFQDTEEAKK.Q              |                                      |
| 22    | 1             | 568.8530  | 91.52              | 2 | 16.8     | 68.4  | 1 | 179-187 | K.KQINDYVEK.G                       |                                      |
| 20    | 1             | 536.6700  | 97.33              | 3 | 16.7     | 60.4  | 2 | 179-192 | K.KQINDYVEKGTQGK.I                  |                                      |
| 38    | 1             | 504.7970  | 86.25              | 2 | 18.2     | 40.9  | 0 | 180-187 | K.QINDYVEK.G                        |                                      |
| 33    | 1             | 740.4080  | 43.85              | 2 | 17.8     | 45.3  | 1 | 180-192 | K.QINDYVEKGTQGK.I                   |                                      |
| 43    | 1             | 638.3660  | 31.56              | 2 | 18.7     | 47.2  | 1 | 216-225 | K.GKWERPFEVK.D                      |                                      |
| 108   | 1             | 1050.2530 | 70.55              | 3 | 24.0     | 89.3  | 2 | 216-241 | K.GKWERPFEVKDTEEEEDFHVDQVT<br>TVK.V |                                      |
| 63    | 1             | 545.8590  | 130.74             | 2 | 20.5     | 32.8  | 0 | 218-225 | K.WERPFEVK.D                        |                                      |
| 96    | 1             | 946.4990  | 71.39              | 2 | 23.2     | 110.9 | 0 | 226-241 | K.DTEEEEDFHVDQVTTVK.V               |                                      |
| 106   | 1             | 837.4410  | 66.04              | 3 | 23.8     | 70.0  | 1 | 226-246 | K.DTEEEEDFHVDQVTTVKVPMMK.R          | Oxidation: 19, 20                    |
| 87    | 1             | 889.4940  | 83.88              | 3 | 22.3     | 52.4  | 2 | 226-247 | K.DTEEEEDFHVDQVTTVKVPMMKR.<br>L     | Oxidation: 19, 20                    |
| 31    | 1             | 473.9150  | 22.55              | 3 | 17.7     | 34.3  | 1 | 247-257 | K.RLGMFNIQHCK.K                     | Carbamidomethyl: 10;<br>Oxidation: 4 |
| 27    | 1             | 464.6200  | 109.93             | 3 | 17.2     | 20.9  | 1 | 248-258 | R.LGMFNIQHCKK.L                     | Carbamidomethyl: 9; Oxidation:       |

# Accumulated Protein Report



| Protein | Count | m/z       | Δ m/z [ppm] | z | Rt [min] | Score | P | Range   | Sequence                               | Modification       |
|---------|-------|-----------|-------------|---|----------|-------|---|---------|----------------------------------------|--------------------|
|         |       |           |             |   |          |       |   |         |                                        | 3                  |
| 89      | 1     | 602.0430  | 85.55       | 3 | 22.6     | 55.9  | 0 | 284-298 | K.LQHLENELTHDIITK.F                    |                    |
| 18      | 1     | 539.8040  | 67.74       | 2 | 16.4     | 32.6  | 1 | 299-306 | K.FLENEDRR.S                           |                    |
| 30      | 1     | 426.7530  | 5.79        | 2 | 17.6     | 64.1  | 0 | 307-314 | R.SASLHLPK.L                           |                    |
| 109     | 1     | 555.8890  | 149.88      | 2 | 24.2     | 70.6  | 0 | 315-324 | K.LSITGTYDLK.S                         |                    |
| 119     | 1     | 508.3800  | 135.84      | 2 | 25.2     | 85.3  | 0 | 325-334 | K.SVLGQLGITK.V                         |                    |
| 155     | 1     | 918.0340  | 83.79       | 2 | 27.7     | 116.7 | 0 | 335-352 | K.VFSNGADLSGVTEEAPLK.L                 | Deamidated: 4      |
| 134     | 2     | 917.5370  | 78.39       | 2 | 26.2     | 110.9 | 0 | 335-352 | K.VFSNGADLSGVTEEAPLK.L                 |                    |
| 135     | 3     | 721.4550  | 100.04      | 3 | 26.3     | 62.2  | 1 | 335-355 | K.VFSNGADLSGVTEEAPLKLSK.A              |                    |
| 153     | 2     | 721.7880  | 106.92      | 3 | 27.5     | 59.5  | 1 | 335-355 | K.VFSNGADLSGVTEEAPLKLSK.A              | Deamidated: 4      |
| 202     | 1     | 1054.2920 | 77.73       | 3 | 32.4     | 51.5  | 1 | 360-389 | K.AVLTIDEKGTEAAGAMFLEAIPM<br>SIPPEVK.F | Oxidation: 16, 23  |
| 191     | 2     | 1146.1350 | 58.00       | 2 | 31.3     | 66.3  | 0 | 368-389 | K.GTEAAGAMFLEAIPMSIPPEVK.<br>F         | Oxidation: 8, 15   |
| 152     | 2     | 624.7380  | 121.15      | 3 | 27.3     | 67.9  | 0 | 390-404 | K.FNKPFVFLMIEQNTK.S                    | Oxidation: 9       |
| 151     | 1     | 620.0450  | 94.04       | 3 | 27.3     | 41.3  | 0 | 390-404 | K.FNKPFVFLMIEQNTK.S                    | Deamidated: 12, 13 |

**Protein 2:** Serum albumin OS=Homo sapiens GN=ALB PE=1 SV=2  
**Accession:** ALBU\_HUMAN **Score:** 2321.87  
**Database:** SwissProt\_July2013 **MW [kDa]:** 69.30  
**Seq. Coverage [%]:** 67.00 % **pI:** 5.88  
**No. of Peptides:** 35

**Modification(s):** Carbamidomethyl, Oxidation, Deamidated

| Cmpd. | No. of Cmpds. | m/z meas. | Δ m/z [ppm] | z | Rt [min] | Score | P | Range   | Sequence                               | Modification                            |
|-------|---------------|-----------|-------------|---|----------|-------|---|---------|----------------------------------------|-----------------------------------------|
| 1     | 1             | 575.3690  | 134.52      | 2 | 14.4     | 63.2  | 1 | 25-34   | R.DAHKSEVAHR.F                         |                                         |
| 51    | 1             | 613.8520  | 74.57       | 2 | 19.7     | 75.5  | 1 | 35-44   | R.FKDLGEENFK.A                         |                                         |
| 14    | 1             | 749.8520  | 78.87       | 2 | 16.1     | 106.7 | 0 | 76-88   | K.TCVADESAENCDK.S                      | Carbamidomethyl: 2, 11                  |
| 138   | 1             | 1137.8950 | 21.30       | 3 | 26.5     | 71.3  | 2 | 76-105  | K.TCVADESAENCDKSLHTLFGDKL<br>CTVATLR.E | Carbamidomethyl: 2, 11, 24              |
| 19    | 1             | 725.8030  | 48.50       | 2 | 16.6     | 52.0  | 0 | 106-117 | R.ETYGEMADCCAK.Q                       | Carbamidomethyl: 9, 10;<br>Oxidation: 6 |
| 25    | 1             | 572.3080  | 65.74       | 3 | 17.1     | 39.0  | 1 | 118-130 | K.QEPERNECFLQHK.D                      | Carbamidomethyl: 8                      |
| 49    | 2             | 879.4790  | 74.07       | 3 | 19.5     | 34.9  | 2 | 118-138 | K.QEPERNECFLQHKDDNPNLPR.L              | Carbamidomethyl: 8                      |
| 56    | 1             | 879.7920  | 56.99       | 3 | 20.0     | 44.9  | 2 | 118-138 | K.QEPERNECFLQHKDDNPNLPR.L              | Carbamidomethyl: 8;<br>Deamidated: 6    |



## Accumulated Protein Report

|     |   |           |        |   |      |       |   |         |                                  |                                                  |
|-----|---|-----------|--------|---|------|-------|---|---------|----------------------------------|--------------------------------------------------|
| 50  | 1 | 666.3500  | 53.06  | 3 | 19.6 | 53.4  | 1 | 123-138 | R.NECFLQHKDDNPNLPR.L             | Carbamidomethyl: 3                               |
| 35  | 1 | 470.7690  | 87.57  | 2 | 18.1 | 45.7  | 0 | 131-138 | K.DDNPDLPR.L                     |                                                  |
| 105 | 3 | 699.4000  | 80.18  | 4 | 23.7 | 47.6  | 1 | 139-161 | R.LVRPEVDVMCTAFHDNEETFLKK.Y      | Carbamidomethyl: 10; Oxidation: 9                |
| 85  | 1 | 464.3090  | 126.31 | 2 | 22.2 | 47.9  | 0 | 162-168 | K.YLYEIAR.R                      |                                                  |
| 176 | 1 | 633.7440  | 116.91 | 3 | 29.4 | 75.7  | 1 | 169-183 | R.RHPYFYAPELLFFAK.R              |                                                  |
| 113 | 1 | 709.0650  | 90.72  | 3 | 24.7 | 70.5  | 1 | 187-205 | K.AAFTECCQAADKAACLLPK.L          | Carbamidomethyl: 6, 7, 15                        |
| 12  | 1 | 759.9490  | 75.60  | 2 | 15.9 | 75.2  | 2 | 206-219 | K.LDELDEGKASSAK.Q                |                                                  |
| 17  | 1 | 438.2830  | 55.86  | 2 | 16.3 | 20.6  | 1 | 243-249 | R.LSQRFPK.A                      |                                                  |
| 42  | 1 | 696.3020  | 25.81  | 3 | 18.6 | 59.0  | 0 | 265-281 | K.VHTECCHGDLLECADDR.A            | Carbamidomethyl: 5, 6, 13                        |
| 61  | 2 | 862.4310  | 62.12  | 3 | 20.3 | 65.6  | 1 | 265-286 | K.VHTECCHGDLLECADDRDLAK.Y        | Carbamidomethyl: 5, 6, 13                        |
| 37  | 1 | 722.3630  | 53.08  | 2 | 18.2 | 74.0  | 0 | 287-298 | K.YICENQDSISSK.L                 | Carbamidomethyl: 3                               |
| 24  | 1 | 773.9740  | 93.01  | 2 | 17.0 | 58.2  | 1 | 299-310 | K.LKECCEKPLEK.S                  | Carbamidomethyl: 4, 5                            |
| 192 | 5 | 997.5270  | 75.88  | 3 | 31.3 | 118.1 | 0 | 311-337 | K.SHCIAEVENDEMPADLPSLAADF VESK.D | Carbamidomethyl: 3; Oxidation: 12                |
| 186 | 1 | 998.0970  | 318.39 | 3 | 30.9 | 88.1  | 0 | 311-337 | K.SHCIAEVENDEMPADLPSLAADF VESK.D | Carbamidomethyl: 3; Oxidation: 12; Deamidated: 9 |
| 199 | 2 | 992.1990  | 79.95  | 3 | 32.0 | 108.1 | 0 | 311-337 | K.SHCIAEVENDEMPADLPSLAADF VESK.D | Carbamidomethyl: 3                               |
| 9   | 1 | 599.3310  | 81.66  | 2 | 15.8 | 33.0  | 1 | 338-347 | K.DVCKNYAEAK.D                   | Carbamidomethyl: 3                               |
| 112 | 1 | 490.0290  | 156.06 | 3 | 24.6 | 73.0  | 1 | 361-372 | R.RHPDYSVLLLLR.L                 |                                                  |
| 179 | 1 | 1023.1650 | 111.12 | 2 | 29.7 | 70.3  | 0 | 397-413 | K.VFDEFKPLVEEPQNLIK.Q            |                                                  |
| 148 | 1 | 829.4680  | 106.15 | 2 | 27.1 | 97.1  | 0 | 414-426 | K.QNCELFEQLGEYK.F                | Carbamidomethyl: 3                               |
| 188 | 1 | 867.1750  | 81.93  | 3 | 31.0 | 81.2  | 1 | 414-434 | K.QNCELFEQLGEYKFQNALLVR.Y        | Carbamidomethyl: 3                               |
| 92  | 1 | 820.5290  | 68.85  | 2 | 22.8 | 97.2  | 1 | 438-452 | K.KVPQVSTPTLVEVSR.N              |                                                  |
| 205 | 1 | 897.5380  | 107.55 | 3 | 32.7 | 43.5  | 1 | 469-490 | K.RMPCAEDYLSVVLNQLCVLHEK.T       | Carbamidomethyl: 4, 17; Oxidation: 2             |
| 5   | 1 | 501.8290  | 92.56  | 2 | 15.1 | 31.7  | 1 | 491-499 | K.TPVSDRVTK.C                    |                                                  |
| 120 | 1 | 956.0640  | 98.88  | 2 | 25.3 | 64.5  | 0 | 509-524 | R.RPCFSALEVDETYVPK.E             | Carbamidomethyl: 3                               |
| 146 | 1 | 849.1600  | 117.41 | 3 | 26.9 | 70.8  | 1 | 525-545 | K.EFNAETFTFHADICTLSEKER.Q        | Carbamidomethyl: 14                              |
| 62  | 1 | 564.9230  | 123.96 | 2 | 20.3 | 81.6  | 1 | 549-558 | K.KQTALVELVK.H                   |                                                  |
| 11  | 1 | 814.4090  | 51.51  | 2 | 15.9 | 64.1  | 2 | 585-598 | K.ADDKETCFEEGKK.L                | Carbamidomethyl: 7                               |

**Protein 3:** Haptoglobin OS=Homo sapiens GN=HP PE=1 SV=1  
**Accession:** HPT\_HUMAN  
**Database:** SwissProt\_July2013

**Score:** 64.33  
**MW [kDa]:** 45.20



## Accumulated Protein Report

Seq. Coverage [%]: 2.70 %

pl: 6.13  
No. of Peptides: 1

| Cmpd. | No. of Cmpds. | m/z meas. | $\Delta$ m/z [ppm] | z | Rt [min] | Score | P | Range   | Sequence        | Modification |
|-------|---------------|-----------|--------------------|---|----------|-------|---|---------|-----------------|--------------|
| 2     | 1             | 637.9140  | 143.60             | 2 | 14.6     | 64.3  | 1 | 312-322 | R.HYEGSTVPEKK.T |              |

### Search Type

Combined MS/MS - ProteinExtractor

### Search Result

Amazon Human\_SPJuly2013\_2016-08-08 18:23:29

### Search Location

/Kathir/ABC 2016 IgG And A1AT/KA A1AT ISo Drop 1min E3\_RC8\_01\_8277.d/

### Protein 1:

Serum albumin OS=Homo sapiens GN=ALB PE=1 SV=2

### Accession:

ALBU\_HUMAN

Score: 2613.53

### Database:

SwissProt\_July2013

MW [kDa]: 69.30

### Seq. Coverage [%]:

74.50 %

pl: 5.88

No. of Peptides: 39

### Modification(s):

Carbamidomethyl, Oxidation, Deamidated

| Cmpd. | No. of Cmpds. | m/z meas. | $\Delta$ m/z [ppm] | z | Rt [min] | Score | P | Range   | Sequence                           | Modification                               |
|-------|---------------|-----------|--------------------|---|----------|-------|---|---------|------------------------------------|--------------------------------------------|
| 1     | 1             | 575.3780  | 150.17             | 2 | 14.4     | 58.9  | 1 | 25-34   | R.DAHKSEVAHR.F                     |                                            |
| 54    | 1             | 613.8600  | 87.60              | 2 | 19.7     | 72.2  | 1 | 35-44   | R.FKDLGEENFK.A                     |                                            |
| 210   | 1             | 830.8480  | 98.09              | 3 | 34.7     | 90.5  | 0 | 45-65   | K.ALVLIAFAQYLQQCFEDHVK.L           | Carbamidomethyl: 14                        |
| 89    | 1             | 575.3580  | 81.44              | 2 | 22.9     | 66.6  | 0 | 66-75   | K.LVNEVTEFAK.T                     |                                            |
| 16    | 1             | 749.8500  | 76.20              | 2 | 16.1     | 111.9 | 0 | 76-88   | K.TCVADESAENCDK.S                  | Carbamidomethyl: 2, 11                     |
| 136   | 2             | 1138.2380 | 34.46              | 3 | 26.5     | 70.9  | 2 | 76-105  | K.TCVADESAENCDKSLHTLFGDKLCTVATLR.E | Carbamidomethyl: 2, 11, 24; Deamidated: 10 |
| 124   | 1             | 644.7590  | 116.49             | 3 | 25.8     | 62.7  | 1 | 89-105  | K.SLHTLFGDKLCTVATLR.E              | Carbamidomethyl: 11                        |
| 21    | 1             | 725.7980  | 41.61              | 2 | 16.6     | 65.9  | 0 | 106-117 | R.ETYGEMADCCAQ.Q                   | Carbamidomethyl: 9, 10; Oxidation: 6       |
| 29    | 1             | 572.3040  | 58.75              | 3 | 17.0     | 38.1  | 1 | 118-130 | K.QEPERNECFLQHK.D                  | Carbamidomethyl: 8                         |
| 51    | 2             | 879.7600  | 20.62              | 3 | 19.2     | 37.4  | 2 | 118-138 | K.QEPERNECFLQHKDDNPPLPR.L          | Carbamidomethyl: 8; Deamidated: 6          |

# Accumulated Protein Report



|     |   |           |        |   |      |       |   |         |                                       |                                         |
|-----|---|-----------|--------|---|------|-------|---|---------|---------------------------------------|-----------------------------------------|
| 52  | 2 | 879.4950  | 92.27  | 3 | 19.4 | 33.0  | 2 | 118-138 | K.QEPERNECFLQHKDDNPNLPR.L             | Carbamidomethyl: 8                      |
| 40  | 1 | 470.7610  | 70.57  | 2 | 18.1 | 38.2  | 0 | 131-138 | K.DDNPNLPR.L                          |                                         |
| 126 | 1 | 695.4100  | 93.20  | 4 | 25.9 | 63.6  | 1 | 139-161 | R.LVRPEVDVMCTAFHDNEETFLKK<br>.Y       | Carbamidomethyl: 10                     |
| 115 | 2 | 699.6550  | 444.81 | 4 | 24.9 | 55.7  | 1 | 139-161 | R.LVRPEVDVMCTAFHDNEETFLKK<br>.Y       | Carbamidomethyl: 10;<br>Oxidation: 9    |
| 79  | 1 | 464.3180  | 145.70 | 2 | 22.2 | 46.0  | 0 | 162-168 | K.YLYEIAR.R                           |                                         |
| 170 | 1 | 633.7470  | 121.64 | 3 | 29.4 | 67.5  | 1 | 169-183 | R.RHPYFYAPELLFFAK.R                   |                                         |
| 113 | 1 | 709.0600  | 83.66  | 3 | 24.7 | 67.9  | 1 | 187-205 | K.AAFTECCQAADKAACLLPK.L               | Carbamidomethyl: 6, 7, 15               |
| 15  | 1 | 506.9710  | 80.63  | 3 | 15.9 | 67.5  | 2 | 206-219 | K.LDEL RDEGKASSAK.Q                   |                                         |
| 19  | 1 | 438.2860  | 62.70  | 2 | 16.4 | 24.6  | 1 | 243-249 | R.LSQRFPK.A                           |                                         |
| 38  | 1 | 440.7590  | 79.02  | 2 | 17.8 | 51.1  | 0 | 250-257 | K.AEFAEVSK.L                          |                                         |
| 96  | 1 | 839.7130  | 77.01  | 4 | 23.5 | 33.8  | 2 | 258-286 | K.LVTDLTKVHTECCHGDLLECADD<br>RADLAK.Y | Carbamidomethyl: 12, 13, 20             |
| 46  | 1 | 696.3030  | 27.25  | 3 | 18.6 | 67.9  | 0 | 265-281 | K.VHTECCHGDLLECADDR.A                 | Carbamidomethyl: 5, 6, 13               |
| 67  | 2 | 862.4410  | 73.72  | 3 | 20.9 | 53.1  | 1 | 265-286 | K.VHTECCHGDLLECADDRADLAK.<br>Y        | Carbamidomethyl: 5, 6, 13               |
| 41  | 1 | 722.3560  | 43.39  | 2 | 18.2 | 90.8  | 0 | 287-298 | K.YICENQDSISSK.L                      | Carbamidomethyl: 3                      |
| 28  | 1 | 773.9790  | 99.47  | 2 | 17.0 | 59.3  | 1 | 299-310 | K.LKECCEKPLLEK.S                      | Carbamidomethyl: 4, 5                   |
| 188 | 3 | 997.5220  | 70.86  | 3 | 31.4 | 116.7 | 0 | 311-337 | K.SHCIAEVENDEMPADLPSLAADF<br>VESK.D   | Carbamidomethyl: 3; Oxidation:<br>12    |
| 194 | 1 | 992.1910  | 71.89  | 3 | 32.1 | 117.8 | 0 | 311-337 | K.SHCIAEVENDEMPADLPSLAADF<br>VESK.D   | Carbamidomethyl: 3                      |
| 11  | 1 | 599.3310  | 81.66  | 2 | 15.7 | 32.7  | 1 | 338-347 | K.DVCKNYAEAK.D                        | Carbamidomethyl: 3                      |
| 111 | 1 | 490.0230  | 143.82 | 3 | 24.6 | 70.2  | 1 | 361-372 | R.RHPDYSVLLLLR.L                      |                                         |
| 174 | 1 | 1023.1590 | 105.25 | 2 | 29.7 | 76.3  | 0 | 397-413 | K.VFDEFKPLVEEPQNLIK.Q                 |                                         |
| 184 | 1 | 867.1840  | 92.30  | 3 | 31.0 | 97.6  | 1 | 414-434 | K.QNCELFEQLGEYKFQNALLVR.Y             | Carbamidomethyl: 3                      |
| 88  | 1 | 820.5230  | 61.54  | 2 | 22.8 | 69.5  | 1 | 438-452 | K.KVPQVSTPTLVEVSR.N                   |                                         |
| 199 | 1 | 897.5390  | 108.66 | 3 | 32.6 | 62.9  | 1 | 469-490 | K.RMPCAEDYLSVVLNQLCVLHEK.<br>T        | Carbamidomethyl: 4, 17;<br>Oxidation: 2 |
| 203 | 1 | 798.2130  | 91.60  | 4 | 33.2 | 76.8  | 1 | 470-496 | R.MPCAEDYLSVVLNQLCVLHEKTP<br>VSDR.V   | Carbamidomethyl: 3, 16;<br>Oxidation: 1 |
| 5   | 1 | 501.8210  | 76.62  | 2 | 15.0 | 31.8  | 1 | 491-499 | K.TPVSDRVTK.C                         |                                         |
| 117 | 1 | 637.7080  | 92.93  | 3 | 25.3 | 87.3  | 0 | 509-524 | R.RPCFSALEVDETYVPK.E                  | Carbamidomethyl: 3                      |
| 139 | 1 | 849.1510  | 106.81 | 3 | 26.8 | 91.5  | 1 | 525-545 | K.EFNAETFTFHADICTLSEKER.Q             | Carbamidomethyl: 14                     |
| 61  | 1 | 564.9160  | 111.57 | 2 | 20.2 | 81.8  | 1 | 549-558 | K.KQTALVELVK.H                        |                                         |
| 12  | 1 | 543.2770  | 54.99  | 3 | 15.8 | 70.3  | 2 | 585-598 | K.ADDKETCFEEGKK.L                     | Carbamidomethyl: 7                      |





## Accumulated Protein Report

**Protein 2:** Alpha-1-antitrypsin OS=Homo sapiens GN=SERPINA1 PE=1 SV=3  
**Accession:** A1AT\_HUMAN **Score:** 2214.96  
**Database:** SwissProt\_July2013 **MW [kDa]:** 46.70  
**Seq. Coverage [%]:** 59.30 % **pl:** 5.27  
**No. of Peptides:** 32

**Modification(s):** Carbamidomethyl, Oxidation, Deamidated

| Cmpd. | No. of Cmpds. | m/z meas. | $\Delta$ m/z [ppm] | z | Rt [min] | Score | P | Range   | Sequence                             | Modification                         |
|-------|---------------|-----------|--------------------|---|----------|-------|---|---------|--------------------------------------|--------------------------------------|
| 3     | 2             | 593.9520  | 41.16              | 3 | 14.8     | 55.1  | 0 | 35-49   | K.TDTSHTDQDHPTFNK.I                  |                                      |
| 171   | 1             | 1134.9710 | 83.61              | 3 | 29.5     | 60.0  | 1 | 35-63   | K.TDTSHTDQDHPTFNKIPNLAEF<br>AFSLYR.Q |                                      |
| 208   | 1             | 821.5310  | 116.38             | 2 | 34.0     | 91.9  | 0 | 50-63   | K.ITPNLAEF AFSLYR.Q                  |                                      |
| 195   | 1             | 1288.2060 | 30.95              | 2 | 32.1     | 124.2 | 0 | 126-149 | R.TLNQPDSQLQLTTGNGLFLSEGL<br>K.L     | Deamidated: 15                       |
| 186   | 2             | 1287.7280 | 41.84              | 2 | 31.2     | 129.5 | 0 | 126-149 | R.TLNQPDSQLQLTTGNGLFLSEGL<br>K.L     |                                      |
| 69    | 1             | 667.3980  | 12.10              | 2 | 21.0     | 68.2  | 2 | 150-160 | K.LVDKFLEDVKK.L                      |                                      |
| 73    | 1             | 772.1040  | 70.14              | 3 | 21.3     | 87.6  | 2 | 160-179 | K.KLYHSEFTVNFVDTEEAKK.Q              |                                      |
| 112   | 1             | 686.7030  | 72.51              | 3 | 24.6     | 72.0  | 0 | 161-178 | K.LYHSEFTVNFVDTEEAK.K                |                                      |
| 90    | 2             | 1093.6050 | 74.39              | 2 | 23.0     | 68.5  | 1 | 161-179 | K.LYHSEFTVNFVDTEEAKK.Q               |                                      |
| 26    | 1             | 568.8520  | 89.76              | 2 | 16.8     | 70.6  | 1 | 179-187 | K.KQINDYVEK.G                        |                                      |
| 23    | 1             | 804.4920  | 85.75              | 2 | 16.7     | 72.8  | 2 | 179-192 | K.KQINDYVEKGTQGK.I                   |                                      |
| 43    | 1             | 504.7990  | 90.21              | 2 | 18.3     | 55.4  | 0 | 180-187 | K.QINDYVEK.G                         |                                      |
| 36    | 1             | 740.4060  | 41.14              | 2 | 17.8     | 56.5  | 1 | 180-192 | K.QINDYVEKGTQGK.I                    |                                      |
| 47    | 1             | 638.3700  | 37.82              | 2 | 18.7     | 37.5  | 1 | 216-225 | K.GKWERPFEVK.D                       |                                      |
| 99    | 2             | 1050.2550 | 72.45              | 3 | 23.7     | 100.2 | 2 | 216-241 | K.GKWERPFEVKDTEEEEDFHVDQVT<br>TVK.V  |                                      |
| 62    | 1             | 545.8530  | 119.75             | 2 | 20.4     | 34.2  | 0 | 218-225 | K.WERPFEVK.D                         |                                      |
| 92    | 1             | 946.4960  | 68.22              | 2 | 23.2     | 73.8  | 0 | 226-241 | K.DTEEEEDFHVDQVTTVK.V                |                                      |
| 106   | 2             | 837.4410  | 66.04              | 3 | 24.2     | 88.9  | 1 | 226-246 | K.DTEEEEDFHVDQVTTVKVPMMK.R           | Oxidation: 19, 20                    |
| 82    | 1             | 889.4970  | 87.25              | 3 | 22.3     | 26.2  | 2 | 226-247 | K.DTEEEEDFHVDQVTTVKVPMMKR.<br>L      | Oxidation: 19, 20                    |
| 35    | 1             | 473.9200  | 33.10              | 3 | 17.6     | 20.5  | 1 | 247-257 | K.RLGMFNIQHCK.K                      | Carbamidomethyl: 10;<br>Oxidation: 4 |
| 31    | 1             | 464.6150  | 99.17              | 3 | 17.1     | 25.9  | 1 | 248-258 | R.LGMFNIQHCKK.L                      | Carbamidomethyl: 9; Oxidation:<br>3  |



## Accumulated Protein Report

|     |   |           |        |   |      |       |   |         |                                |                  |
|-----|---|-----------|--------|---|------|-------|---|---------|--------------------------------|------------------|
| 84  | 1 | 602.0400  | 80.57  | 3 | 22.6 | 52.3  | 0 | 284-298 | K.LQHLENELTHDIITK.F            |                  |
| 20  | 1 | 539.8030  | 65.89  | 2 | 16.4 | 26.1  | 1 | 299-306 | K.FLENEDRR.S                   |                  |
| 34  | 1 | 426.7540  | 8.14   | 2 | 17.6 | 42.5  | 0 | 307-314 | R.SASLHLPK.L                   |                  |
| 107 | 1 | 555.8750  | 124.69 | 2 | 24.2 | 87.5  | 0 | 315-324 | K.LSITGTYDLK.S                 |                  |
| 116 | 1 | 508.3790  | 133.88 | 2 | 25.1 | 81.7  | 0 | 325-334 | K.SVLGQLGITK.V                 |                  |
| 152 | 1 | 918.0310  | 80.52  | 2 | 27.7 | 120.1 | 0 | 335-352 | K.VFSNGADLSGVTEEAPLK.L         | Deamidated: 4    |
| 132 | 2 | 917.5340  | 75.12  | 2 | 26.2 | 104.4 | 0 | 335-352 | K.VFSNGADLSGVTEEAPLK.L         |                  |
| 133 | 4 | 721.4570  | 102.82 | 3 | 26.3 | 66.9  | 1 | 335-355 | K.VFSNGADLSGVTEEAPLKLSK.A      |                  |
| 149 | 1 | 1082.1740 | 102.94 | 2 | 27.5 | 64.4  | 1 | 335-355 | K.VFSNGADLSGVTEEAPLKLSK.A      | Deamidated: 4    |
| 187 | 2 | 1146.1340 | 57.13  | 2 | 31.3 | 57.5  | 0 | 368-389 | K.GTEAAGAMFLEAIPMSIPPEVK.<br>F | Oxidation: 8, 15 |
| 145 | 1 | 936.5870  | 103.74 | 2 | 27.3 | 74.0  | 0 | 390-404 | K.FNKPFVFLMIEQNTK.S            | Oxidation: 9     |

**Protein 3:** Haptoglobin OS=Homo sapiens GN=HP PE=1 SV=1  
**Accession:** HPT\_HUMAN **Score:** 57.36  
**Database:** SwissProt\_July2013 **MW [kDa]:** 45.20  
**Seq. Coverage [%]:** 2.70 % **pI:** 6.13  
**No. of Peptides:** 1

| Cmpd. | No. of Cmpds. | m/z meas. | $\Delta$ m/z [ppm] | z | Rt [min] | Score | P | Range   | Sequence        | Modification |
|-------|---------------|-----------|--------------------|---|----------|-------|---|---------|-----------------|--------------|
| 2     | 1             | 637.9060  | 131.06             | 2 | 14.6     | 57.4  | 1 | 312-322 | R.HYEGSTVPEKK.T |              |

**Search Type:** Combined MS/MS - ProteinExtractor  
**Search Result:** Amazon Human\_SPJuly2013\_2016-08-08 18:23:29  
**Search Location:** /Kathir/ABC 2016 IgG And A1AT/KA IgG EtOH Drop 1min E1\_RD1\_01\_8278.d/

**Protein 1:** Ig kappa chain C region OS=Homo sapiens GN=IGKC PE=1 SV=1  
**Accession:** IGKC\_HUMAN **Score:** 854.69  
**Database:** SwissProt\_July2013 **MW [kDa]:** 11.60  
**Seq. Coverage [%]:** 75.50 % **pI:** 5.53  
**No. of Peptides:** 9

## Accumulated Protein Report

Modification(s): Carbamidomethyl, Deamidated

| Cmpd. | No. of Cmpds. | m/z meas. | $\Delta$ m/z [ppm] | z | Rt [min] | Score | P | Range | Sequence                                | Modification       |
|-------|---------------|-----------|--------------------|---|----------|-------|---|-------|-----------------------------------------|--------------------|
| 185   | 2             | 973.6210  | 106.71             | 2 | 30.9     | 65.0  | 0 | 1-18  | -.TVAAPSVFIFPPSDEQLK.S                  |                    |
| 116   | 1             | 893.1230  | 31.52              | 3 | 22.5     | 111.2 | 1 | 38-61 | K.VQWKVDNALQSGNSQESVTEQDS<br>K.D        |                    |
| 73    | 4             | 1068.5390 | 47.73              | 2 | 18.7     | 120.8 | 0 | 42-61 | K.VDNALQSGNSQESVTEQDSK.D                |                    |
| 85    | 1             | 1069.0510 | 66.41              | 2 | 19.6     | 146.9 | 0 | 42-61 | K.VDNALQSGNSQESVTEQDSK.D                | Deamidated: 9      |
| 141   | 1             | 1207.3000 | 48.63              | 3 | 26.0     | 92.8  | 1 | 42-75 | K.VDNALQSGNSQESVTEQDSKST<br>YLSSTLTLK.A |                    |
| 150   | 1             | 752.0320  | 198.35             | 2 | 27.1     | 113.4 | 0 | 62-75 | K.DSTYLSSTLTLK.A                        |                    |
| 27    | 1             | 445.7750  | 118.98             | 2 | 14.4     | 25.1  | 1 | 76-82 | K.ADYEKHK.V                             |                    |
| 74    | 1             | 714.4350  | 97.82              | 3 | 18.7     | 106.0 | 1 | 81-99 | K.HKVYACEVTHQGLSSPVTK.S                 | Carbamidomethyl: 6 |
| 93    | 1             | 626.0410  | 96.66              | 3 | 20.4     | 73.5  | 0 | 83-99 | K.VYACEVTHQGLSSPVTK.S                   | Carbamidomethyl: 4 |

Protein 2: Ig gamma-1 chain C region OS=Homo sapiens GN=IGHG1 PE=1 SV=1

Accession: IGHG1\_HUMAN

Database: SwissProt\_July2013

Seq. Coverage [%]: 47.90 %

Score: 831.19

MW [kDa]: 36.10

pI: 9.36

No. of Peptides: 13

Modification(s): Carbamidomethyl, Deamidated

| Cmpd. | No. of Cmpds. | m/z meas. | $\Delta$ m/z [ppm] | z | Rt [min] | Score | P | Range   | Sequence                             | Modification              |
|-------|---------------|-----------|--------------------|---|----------|-------|---|---------|--------------------------------------|---------------------------|
| 134   | 1             | 593.9190  | 154.99             | 2 | 24.6     | 69.2  | 0 | 5-16    | K.GPSVFPLAPSSK.S                     |                           |
| 118   | 1             | 661.4120  | 104.86             | 2 | 22.6     | 65.5  | 0 | 17-30   | K.STSGGTAALGCLVK.D                   | Carbamidomethyl: 11       |
| 162   | 1             | 1112.3040 | 76.52              | 3 | 27.9     | 67.6  | 1 | 102-131 | K.SCDKTHTCPAPPELLGGPSVF<br>LFPPKPK.D | Carbamidomethyl: 2, 8, 11 |
| 137   | 1             | 839.4890  | 100.51             | 2 | 24.9     | 94.8  | 0 | 158-171 | K.FNWYVDGVEVHNAK.T                   |                           |
| 117   | 2             | 643.9210  | 124.87             | 2 | 22.5     | 26.9  | 0 | 228-238 | R.EPQVYTLPPSR.D                      |                           |
| 125   | 1             | 937.0510  | 66.47              | 2 | 23.1     | 29.6  | 1 | 228-243 | R.EPQVYTLPPSRDELTK.N                 |                           |
| 130   | 1             | 581.3860  | 116.20             | 2 | 23.9     | 71.4  | 0 | 244-253 | K.NQVSLTCLVK.G                       | Carbamidomethyl: 7        |
| 181   | 2             | 1272.6210 | 40.61              | 2 | 29.8     | 100.2 | 0 | 254-275 | K.GFYPSDIAVEWESNGQPENNYK.<br>T       |                           |
| 182   | 4             | 1273.1190 | 45.30              | 2 | 30.2     | 122.2 | 0 | 254-275 | K.GFYPSDIAVEWESNGQPENNYK.<br>T       | Deamidated: 14            |



## Accumulated Protein Report

|     |   |           |        |   |      |      |   |         |                                 |                    |
|-----|---|-----------|--------|---|------|------|---|---------|---------------------------------|--------------------|
| 186 | 3 | 1273.6000 | 36.64  | 2 | 30.9 | 78.0 | 0 | 254-275 | K.GFYPSDIAVEWESNGQPENNYK.<br>T  | Deamidated: 14, 20 |
| 184 | 3 | 1273.5980 | 35.07  | 2 | 30.7 | 93.7 | 0 | 254-275 | K.GFYPSDIAVEWESNGQPENNYK.<br>T  | Deamidated: 14, 19 |
| 183 | 1 | 937.5570  | 98.62  | 2 | 30.5 | 67.4 | 0 | 276-292 | K.TTPPVLDSDGSFFLYSK.L           |                    |
| 128 | 1 | 934.3760  | -54.82 | 3 | 23.7 | 22.7 | 0 | 300-322 | R.WQQGNVFSCSVMHEALHNHYTQK<br>.S | Carbamidomethyl: 9 |

**Protein 3:** Ig gamma-4 chain C region OS=Homo sapiens GN=IGHG4 PE=1 SV=1  
**Accession:** IGHG4\_HUMAN **Score:** 500.63  
**Database:** SwissProt\_July2013 **MW [kDa]:** 35.90  
**Seq. Coverage [%]:** 8.60 % **pl:** 7.80  
**No. of Peptides:** 2

**Modification(s):** Carbamidomethyl, Deamidated

| Cmpd. | No. of Cmpds. | m/z meas. | $\Delta$ m/z [ppm] | z | Rt [min] | Score | P | Range | Sequence           | Modification        |
|-------|---------------|-----------|--------------------|---|----------|-------|---|-------|--------------------|---------------------|
| 126   | 1             | 712.4230  | 90.55              | 2 | 23.3     | 72.4  | 0 | 17-30 | R.STSESTAALGCLVK.D | Carbamidomethyl: 11 |
| 31    | 1             | 555.6240  | 52.65              | 3 | 14.8     | 40.7  | 0 | 80-93 | K.TYTCNVDPKPSNTK.V | Carbamidomethyl: 4  |

**Protein 4:** Ig lambda-3 chain C regions OS=Homo sapiens GN=IGLC3 PE=1 SV=1  
**Accession:** LAC3\_HUMAN **Score:** 312.02  
**Database:** SwissProt\_July2013 **MW [kDa]:** 11.20  
**Seq. Coverage [%]:** 55.70 % **pl:** 7.72  
**No. of Peptides:** 4

**Modification(s):** Carbamidomethyl, Deamidated

| Cmpd. | No. of Cmpds. | m/z meas. | $\Delta$ m/z [ppm] | z | Rt [min] | Score | P | Range | Sequence                | Modification       |
|-------|---------------|-----------|--------------------|---|----------|-------|---|-------|-------------------------|--------------------|
| 152   | 1             | 993.6050  | 93.04              | 2 | 27.3     | 89.1  | 0 | 5-23  | K.AAPSVTLFPPSSEELQANK.A |                    |
| 37    | 1             | 495.8210  | 125.57             | 2 | 15.4     | 61.3  | 0 | 51-60 | K.AGVETTTPSK.Q          |                    |
| 166   | 2             | 873.0470  | 703.72             | 2 | 28.5     | 82.3  | 0 | 66-80 | K.YAASSYLSLTPEQWK.S     |                    |
| 53    | 1             | 856.4630  | 93.14              | 2 | 16.8     | 79.4  | 0 | 84-98 | K.SYSCQVTHEGSTVEK.T     | Carbamidomethyl: 4 |

**Protein 5:** Ig gamma-2 chain C region OS=Homo sapiens GN=IGHG2 PE=1 SV=2  
**Accession:** IGHG2\_HUMAN **Score:** 273.87  
**Database:** SwissProt\_July2013 **MW [kDa]:** 35.90



# Accumulated Protein Report

Seq. Coverage [%]: 12.90 %      pl: 8.80  
 Modification(s): Carbamidomethyl, Oxidation      No. of Peptides: 2

| Cmpd. | No. of Cmpds. | m/z meas. | Δ m/z [ppm] | z | Rt [min] | Score | P | Range   | Sequence                          | Modification                |
|-------|---------------|-----------|-------------|---|----------|-------|---|---------|-----------------------------------|-----------------------------|
| 177   | 1             | 970.2110  | 74.48       | 3 | 29.2     | 48.3  | 0 | 102-127 | K.CCVECPCPAPPVAGPSVFLFPP<br>KPK.D | Carbamidomethyl: 1, 2, 5, 8 |
| 95    | 2             | 961.0620  | 93.43       | 2 | 20.7     | 32.1  | 1 | 224-239 | R.EPQVYTLPPSREEMTK.N              | Oxidation: 14               |

**Protein 6:** Ig heavy chain V-III region WEA OS=Homo sapiens PE=1 SV=1  
**Accession:** HV302\_HUMAN      **Score:** 71.50  
**Database:** SwissProt\_July2013      **MW [kDa]:** 12.20  
**Seq. Coverage [%]:** 9.60 %      **pl:** 9.50  
**Modification(s):** Carbamidomethyl      **No. of Peptides:** 1

| Cmpd. | No. of Cmpds. | m/z meas. | Δ m/z [ppm] | z | Rt [min] | Score | P | Range | Sequence        | Modification       |
|-------|---------------|-----------|-------------|---|----------|-------|---|-------|-----------------|--------------------|
| 89    | 1             | 660.3630  | 868.08      | 2 | 20.2     | 71.5  | 0 | 88-98 | R.AEDTAVYYCAR.G | Carbamidomethyl: 9 |

**Search Type:** Combined MS/MS - ProteinExtractor  
**Search Result:** Amazon Human\_SPJuly2013\_2016-08-08 18:23:29  
**Search Location:** /Kathir/ABC 2016 IgG And A1AT/KA IgG EtOH Drop 1min E2\_RD2\_01\_8279.d/

**Protein 1:** Ig gamma-1 chain C region OS=Homo sapiens GN=IGHG1 PE=1 SV=1  
**Accession:** IGHG1\_HUMAN      **Score:** 824.62  
**Database:** SwissProt\_July2013      **MW [kDa]:** 36.10  
**Seq. Coverage [%]:** 46.70 %      **pl:** 9.36  
**Modification(s):** Carbamidomethyl, Deamidated      **No. of Peptides:** 12

| Cmpd. | No. of Cmpds. | m/z meas. | Δ m/z [ppm] | z | Rt [min] | Score | P | Range | Sequence | Modification |
|-------|---------------|-----------|-------------|---|----------|-------|---|-------|----------|--------------|
|-------|---------------|-----------|-------------|---|----------|-------|---|-------|----------|--------------|

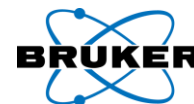

## Accumulated Protein Report

|     |   |           |        |   |      |       |   |         |                                |                       |
|-----|---|-----------|--------|---|------|-------|---|---------|--------------------------------|-----------------------|
| 146 | 1 | 593.9270  | 168.46 | 2 | 24.6 | 57.8  | 0 | 5-16    | K.GPSVFPLAPSSK.S               |                       |
| 135 | 1 | 661.4080  | 98.81  | 2 | 22.6 | 90.5  | 0 | 17-30   | K.STSGGTAALGCLVK.D             | Carbamidomethyl: 11   |
| 187 | 2 | 949.2480  | 446.84 | 3 | 28.7 | 62.4  | 0 | 106-131 | K.THTCPPCPAPELLGGPSVFLFPPKPK.D | Carbamidomethyl: 4, 7 |
| 149 | 1 | 560.6630  | 707.07 | 3 | 24.9 | 38.5  | 0 | 158-171 | K.FNWWYVDGVEVHNAK.T            | Deamidated: 2         |
| 150 | 1 | 839.5240  | 142.21 | 2 | 24.9 | 95.4  | 0 | 158-171 | K.FNWWYVDGVEVHNAK.T            |                       |
| 133 | 1 | 643.8980  | 89.15  | 2 | 22.2 | 41.5  | 0 | 228-238 | R.EPQVYTLPPSR.D                |                       |
| 137 | 1 | 625.0600  | 104.15 | 3 | 23.1 | 24.8  | 1 | 228-243 | R.EPQVYTLPPSRDELTK.N           |                       |
| 142 | 1 | 581.3830  | 111.04 | 2 | 23.8 | 73.9  | 0 | 244-253 | K.NQVSLTCLVK.G                 | Carbamidomethyl: 7    |
| 192 | 2 | 1272.6190 | 39.04  | 2 | 29.8 | 92.7  | 0 | 254-275 | K.GFYPSDIAVEWESNGQPENNYK.T     |                       |
| 193 | 1 | 1273.1200 | 46.08  | 2 | 30.2 | 109.6 | 0 | 254-275 | K.GFYPSDIAVEWESNGQPENNYK.T     | Deamidated: 14        |
| 194 | 1 | 937.5690  | 111.42 | 2 | 30.5 | 98.3  | 0 | 276-292 | K.TTPPVLDSDGSFFLYSK.L          |                       |
| 141 | 1 | 934.4580  | 32.94  | 3 | 23.7 | 39.1  | 0 | 300-322 | R.WQQGNVFSCSVMHEALHNHYTQK.S    | Carbamidomethyl: 9    |

**Protein 2:** Ig kappa chain C region OS=Homo sapiens GN=IGKC PE=1 SV=1

**Accession:** IGKC\_HUMAN **Score:** 691.98

**Database:** SwissProt\_July2013 **MW [kDa]:** 11.60

**Seq. Coverage [%]:** 58.50 % **pl:** 5.53

**No. of Peptides:** 8

**Modification(s):** Carbamidomethyl, Deamidated

| Cmpd. | No. of Cmpds. | m/z meas. | $\Delta$ m/z [ppm] | z | Rt [min] | Score | P | Range | Sequence                              | Modification       |
|-------|---------------|-----------|--------------------|---|----------|-------|---|-------|---------------------------------------|--------------------|
| 136   | 2             | 893.1120  | 19.20              | 3 | 22.9     | 106.7 | 1 | 38-61 | K.VQWKVDNALQSGNSQESVTEQDSK.D          |                    |
| 104   | 2             | 1068.9680 | -11.23             | 2 | 19.1     | 84.5  | 0 | 42-61 | K.VDNALQSGNSQESVTEQDSK.D              | Deamidated: 3      |
| 103   | 6             | 1068.8500 | 338.80             | 2 | 19.0     | 145.5 | 0 | 42-61 | K.VDNALQSGNSQESVTEQDSK.D              |                    |
| 159   | 2             | 1207.2930 | 42.83              | 3 | 26.0     | 135.2 | 1 | 42-75 | K.VDNALQSGNSQESVTEQDSKDSTYLSSTLTLSK.A |                    |
| 163   | 2             | 1207.9470 | 312.78             | 3 | 26.5     | 114.8 | 1 | 42-75 | K.VDNALQSGNSQESVTEQDSKDSTYLSSTLTLSK.A | Deamidated: 17     |
| 54    | 1             | 445.7870  | 145.90             | 2 | 14.4     | 28.7  | 1 | 76-82 | K.ADYEKHK.V                           |                    |
| 101   | 1             | 714.4240  | 82.43              | 3 | 18.6     | 80.6  | 1 | 81-99 | K.HKVYACEVTHQGLSSPVTK.S               | Carbamidomethyl: 6 |
| 118   | 1             | 938.5610  | 100.06             | 2 | 20.4     | 80.6  | 0 | 83-99 | K.VYACEVTHQGLSSPVTK.S                 | Carbamidomethyl: 4 |



## Accumulated Protein Report

**Protein 3:** Ig gamma-4 chain C region OS=Homo sapiens GN=IGHG4 PE=1 SV=1  
**Accession:** IGHG4\_HUMAN **Score:** 387.44  
**Database:** SwissProt\_July2013 **MW [kDa]:** 35.90  
**Seq. Coverage [%]:** 8.60 % **pI:** 7.80  
**No. of Peptides:** 2

**Modification(s):** Carbamidomethyl, Deamidated

| Cmpd. | No. of Cmpds. | m/z meas. | $\Delta$ m/z [ppm] | z | Rt [min] | Score | P | Range | Sequence           | Modification        |
|-------|---------------|-----------|--------------------|---|----------|-------|---|-------|--------------------|---------------------|
| 139   | 1             | 712.4290  | 98.97              | 2 | 23.3     | 78.8  | 0 | 17-30 | R.STSESTAALGCLVK.D | Carbamidomethyl: 11 |
| 59    | 1             | 555.6460  | 92.24              | 3 | 14.7     | 32.4  | 0 | 80-93 | K.TYTCNVDHKPSNTK.V | Carbamidomethyl: 4  |

**Protein 4:** Ig lambda-3 chain C regions OS=Homo sapiens GN=IGLC3 PE=1 SV=1  
**Accession:** LAC3\_HUMAN **Score:** 223.82  
**Database:** SwissProt\_July2013 **MW [kDa]:** 11.20  
**Seq. Coverage [%]:** 41.50 % **pI:** 7.72  
**No. of Peptides:** 3

**Modification(s):** Carbamidomethyl

| Cmpd. | No. of Cmpds. | m/z meas. | $\Delta$ m/z [ppm] | z | Rt [min] | Score | P | Range | Sequence                | Modification       |
|-------|---------------|-----------|--------------------|---|----------|-------|---|-------|-------------------------|--------------------|
| 173   | 2             | 993.5990  | 87.00              | 2 | 27.4     | 66.9  | 0 | 5-23  | K.AAPSVTLFPPSSEELQANK.A |                    |
| 67    | 1             | 495.8160  | 115.49             | 2 | 15.4     | 66.9  | 0 | 51-60 | K.AGVETTTPSK.Q          |                    |
| 82    | 1             | 856.4440  | 70.96              | 2 | 16.8     | 90.1  | 0 | 84-98 | K.SYSCQVTHEGSTVEK.T     | Carbamidomethyl: 4 |

**Search Type** Combined MS/MS - ProteinExtractor  
**Search Result** Amazon Human\_SPJuly2013\_2016-08-08 18:23:29  
**Search Location** /Kathir/ABC 2016 IgG And A1AT/KA IgG EtOH Drop 1min E3\_RD3\_01\_8280.d/

**Protein 1:** Ig gamma-1 chain C region OS=Homo sapiens GN=IGHG1 PE=1 SV=1  
**Accession:** IGHG1\_HUMAN **Score:** 1006.67  
**Database:** SwissProt\_July2013 **MW [kDa]:** 36.10



## Accumulated Protein Report

Seq. Coverage [%]: 53.60 %

pl: 9.36

No. of Peptides: 13

Modification(s): Carbamidomethyl, Deamidated

| Cmpd. | No. of Cmpds. | m/z meas. | $\Delta$ m/z [ppm] | z | Rt [min] | Score | P | Range   | Sequence                               | Modification              |
|-------|---------------|-----------|--------------------|---|----------|-------|---|---------|----------------------------------------|---------------------------|
| 137   | 1             | 593.9230  | 161.72             | 2 | 24.6     | 73.2  | 0 | 5-16    | K.GPSVFPLAPSSK.S                       |                           |
| 122   | 1             | 661.4180  | 113.93             | 2 | 22.6     | 93.1  | 0 | 17-30   | K.STSGGTAALGCLVK.D                     | Carbamidomethyl: 11       |
| 169   | 2             | 1112.3020 | 74.72              | 3 | 28.0     | 54.7  | 1 | 102-131 | K.SCDKTHCPPCPAPPELLGGPSVF<br>LFPPKPK.D | Carbamidomethyl: 2, 8, 11 |
| 141   | 1             | 1070.0440 | 24.90              | 2 | 25.0     | 34.2  | 0 | 139-157 | R.TPEVTCVVVDVSHEDPEVK.F                | Carbamidomethyl: 6        |
| 139   | 1             | 839.5540  | 177.95             | 2 | 24.8     | 94.8  | 0 | 158-171 | K.FNWYVDGVEVHNAK.T                     |                           |
| 119   | 1             | 643.8980  | 89.15              | 2 | 22.3     | 42.7  | 0 | 228-238 | R.EPQVYTLPPSR.D                        |                           |
| 124   | 1             | 937.0670  | 83.54              | 2 | 22.8     | 29.6  | 1 | 228-243 | R.EPQVYTLPPSRDELTK.N                   |                           |
| 131   | 1             | 581.3980  | 136.85             | 2 | 23.7     | 73.8  | 0 | 244-253 | K.NQVSLTCLVK.G                         | Carbamidomethyl: 7        |
| 189   | 3             | 1272.6190 | 39.04              | 2 | 29.8     | 97.8  | 0 | 254-275 | K.GFYPSDIAVEWESNGQPENNYK.<br>T         |                           |
| 190   | 3             | 1273.1200 | 46.08              | 2 | 30.2     | 108.7 | 0 | 254-275 | K.GFYPSDIAVEWESNGQPENNYK.<br>T         | Deamidated: 14            |
| 192   | 1             | 1273.6100 | 44.49              | 2 | 30.6     | 100.1 | 0 | 254-275 | K.GFYPSDIAVEWESNGQPENNYK.<br>T         | Deamidated: 14, 19        |
| 191   | 1             | 937.5670  | 109.28             | 2 | 30.4     | 95.8  | 0 | 276-292 | K.TTPPVLDSDGSFFLYSK.L                  |                           |
| 130   | 1             | 934.8400  | 441.74             | 3 | 23.7     | 43.5  | 0 | 300-322 | R.WQQGNVFSCSVMHEALHNHYTQK<br>.S        | Carbamidomethyl: 9        |

Protein 2: Ig kappa chain C region OS=Homo sapiens GN=IGKC PE=1 SV=1

Accession: IGKC\_HUMAN

Score: 943.25

Database: SwissProt\_July2013

MW [kDa]: 11.60

Seq. Coverage [%]: 97.20 %

pl: 5.53

No. of Peptides: 11

Modification(s): Carbamidomethyl, Deamidated

| Cmpd. | No. of Cmpds. | m/z meas. | $\Delta$ m/z [ppm] | z | Rt [min] | Score | P | Range | Sequence                  | Modification       |
|-------|---------------|-----------|--------------------|---|----------|-------|---|-------|---------------------------|--------------------|
| 194   | 2             | 973.6220  | 107.74             | 2 | 31.0     | 63.4  | 0 | 1-18  | .TVAAPSVFIFPPSDEQLK.S     |                    |
| 197   | 1             | 899.5420  | 100.89             | 2 | 32.2     | 64.0  | 0 | 19-34 | K.SGTASVCLLNIFYPR.E       | Carbamidomethyl: 8 |
| 121   | 2             | 893.1360  | 46.08              | 3 | 22.4     | 103.4 | 1 | 38-61 | K.VQWKVDNALQSGNSQESVTEQDS |                    |



# Accumulated Protein Report



|     |   |           |        |   |      |       |   |         |                                           | K.D                |  |
|-----|---|-----------|--------|---|------|-------|---|---------|-------------------------------------------|--------------------|--|
| 87  | 4 | 1068.9490 | 431.45 | 2 | 19.1 | 127.8 | 0 | 42-61   | K.VDNALQSGNSQESVTEQDSK.D                  |                    |  |
| 94  | 2 | 1069.0500 | 65.47  | 2 | 19.6 | 123.3 | 0 | 42-61   | K.VDNALQSGNSQESVTEQDSK.D                  | Deamidated: 9      |  |
| 150 | 4 | 1207.6030 | 299.61 | 3 | 26.1 | 126.2 | 1 | 42-75   | K.VDNALQSGNSQESVTEQDSKDST<br>YLSSTLTLSK.A |                    |  |
| 155 | 1 | 751.9740  | 121.21 | 2 | 27.0 | 93.4  | 0 | 62-75   | K.DSTYLSSTLTLSK.A                         |                    |  |
| 37  | 1 | 445.8000  | 175.07 | 2 | 14.4 | 31.5  | 1 | 76-82   | K.ADYEKHK.V                               |                    |  |
| 83  | 1 | 714.4390  | 103.42 | 3 | 18.5 | 92.4  | 1 | 81-99   | K.HKVYACEVTHQGLSSPVTK.S                   | Carbamidomethyl: 6 |  |
| 99  | 1 | 938.5610  | 100.06 | 2 | 20.4 | 73.9  | 0 | 83-99   | K.VYACEVTHQGLSSPVTK.S                     | Carbamidomethyl: 4 |  |
| 43  | 1 | 435.2270  | 103.06 | 2 | 15.1 | 43.9  | 1 | 100-106 | K.SFNRGEC.-                               | Carbamidomethyl: 7 |  |

**Protein 3:** Ig gamma-4 chain C region OS=Homo sapiens GN=IGHG4 PE=1 SV=1  
**Accession:** IGHG4\_HUMAN **Score:** 612.56  
**Database:** SwissProt\_July2013 **MW [kDa]:** 35.90  
**Seq. Coverage [%]:** 12.20 % **pI:** 7.80  
**No. of Peptides:** 3

**Modification(s):** Carbamidomethyl, Deamidated

| Cmpd. | No. of Cmpds. | m/z meas. | $\Delta$ m/z [ppm] | z | Rt [min] | Score | P | Range | Sequence           | Modification        |
|-------|---------------|-----------|--------------------|---|----------|-------|---|-------|--------------------|---------------------|
| 146   | 2             | 644.4200  | 140.69             | 2 | 25.5     | 52.1  | 0 | 5-16  | K.GPSVFPLAPCSR.S   | Carbamidomethyl: 10 |
| 127   | 1             | 712.4260  | 94.76              | 2 | 23.3     | 70.8  | 0 | 17-30 | R.STSESTAALGCLVK.D | Carbamidomethyl: 11 |
| 40    | 1             | 555.6400  | 81.45              | 3 | 14.7     | 25.4  | 0 | 80-93 | K.TYTCNVDHKPSNTK.V | Carbamidomethyl: 4  |

**Protein 4:** Ig gamma-2 chain C region OS=Homo sapiens GN=IGHG2 PE=1 SV=2  
**Accession:** IGHG2\_HUMAN **Score:** 418.39  
**Database:** SwissProt\_July2013 **MW [kDa]:** 35.90  
**Seq. Coverage [%]:** 10.10 % **pI:** 8.80  
**No. of Peptides:** 3

**Modification(s):** Carbamidomethyl, Oxidation, Deamidated

| Cmpd. | No. of Cmpds. | m/z meas. | $\Delta$ m/z [ppm] | z | Rt [min] | Score | P | Range   | Sequence              | Modification  |
|-------|---------------|-----------|--------------------|---|----------|-------|---|---------|-----------------------|---------------|
| 101   | 2             | 961.0630  | 94.47              | 2 | 20.6     | 54.0  | 1 | 224-239 | R.EPQVYTLPPSREEMTK.N  | Oxidation: 14 |
| 115   | 1             | 635.7060  | 84.54              | 3 | 21.8     | 23.3  | 1 | 224-239 | R.EPQVYTLPPSREEMTK.N  |               |
| 183   | 2             | 961.5370  | 92.52              | 2 | 29.2     | 58.3  | 0 | 272-288 | K.TTPPMLDSDGSFFLYSK.L | Oxidation: 5  |

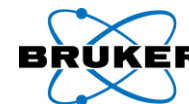

## Accumulated Protein Report

**Protein 5:** Ig lambda-3 chain C regions OS=Homo sapiens GN=IGLC3 PE=1 SV=1  
**Accession:** LAC3\_HUMAN **Score:** 356.83  
**Database:** SwissProt\_July2013 **MW [kDa]:** 11.20  
**Seq. Coverage [%]:** 63.20 % **pl:** 7.72  
**No. of Peptides:** 5

**Modification(s):** Carbamidomethyl, Deamidated

| Cmpd. | No. of Cmpds. | m/z meas. | $\Delta$ m/z [ppm] | z | Rt [min] | Score | P | Range  | Sequence                  | Modification           |
|-------|---------------|-----------|--------------------|---|----------|-------|---|--------|---------------------------|------------------------|
| 158   | 3             | 994.1190  | 610.40             | 2 | 27.3     | 85.2  | 0 | 5-23   | K.AAPSVTLFPPSSEELQANK.A   |                        |
| 49    | 1             | 495.8130  | 109.44             | 2 | 15.5     | 70.7  | 0 | 51-60  | K.AGVETTTPSK.Q            |                        |
| 175   | 2             | 873.0570  | 715.18             | 2 | 28.4     | 90.2  | 0 | 66-80  | K.YAASSYLSLTPEQWK.S       |                        |
| 63    | 2             | 856.4570  | 86.14              | 2 | 16.8     | 69.3  | 0 | 84-98  | K.SYSCQVTHEGSTVEK.T       | Carbamidomethyl: 4     |
| 102   | 1             | 853.0760  | 37.25              | 3 | 20.6     | 41.4  | 1 | 84-106 | K.SYSCQVTHEGSTVEKTVAPTECS | Carbamidomethyl: 4, 22 |

**Search Type:** Combined MS/MS - ProteinExtractor  
**Search Result:** Amazon Human\_SPJuly2013\_2016-08-08 18:23:29  
**Search Location:** /Kathir/ABC 2016 IgG And A1AT/KA IgG ISo Drop 1min E1\_RC3\_01\_8272.d/

**Protein 1:** Ig gamma-1 chain C region OS=Homo sapiens GN=IGHG1 PE=1 SV=1  
**Accession:** IGHG1\_HUMAN **Score:** 1174.82  
**Database:** SwissProt\_July2013 **MW [kDa]:** 36.10  
**Seq. Coverage [%]:** 59.40 % **pl:** 9.36  
**No. of Peptides:** 17

**Modification(s):** Carbamidomethyl, Oxidation, Deamidated

| Cmpd. | No. of Cmpds. | m/z meas. | $\Delta$ m/z [ppm] | z | Rt [min] | Score | P | Range   | Sequence                            | Modification              |
|-------|---------------|-----------|--------------------|---|----------|-------|---|---------|-------------------------------------|---------------------------|
| 109   | 1             | 593.8890  | 104.47             | 2 | 24.6     | 71.7  | 0 | 5-16    | K.GPSVFPLAPSSK.S                    |                           |
| 85    | 1             | 661.4130  | 106.37             | 2 | 22.5     | 99.8  | 0 | 17-30   | K.STSGGTAALGCLVK.D                  | Carbamidomethyl: 11       |
| 139   | 2             | 1112.2360 | 15.38              | 3 | 27.8     | 66.1  | 1 | 102-131 | K.SCDKTHTCPPCPAPPELLGGPSVFLFPPKPK.D | Carbamidomethyl: 2, 8, 11 |
| 149   | 1             | 949.2000  | 396.25             | 3 | 28.7     | 75.6  | 0 | 106-131 | K.THTCPPCPAPPELLGGPSVFLFPP          | Carbamidomethyl: 4, 7     |

# Accumulated Protein Report



|     |   |           |        |   |      |       |   |         | KPK.D                           |                                   |
|-----|---|-----------|--------|---|------|-------|---|---------|---------------------------------|-----------------------------------|
| 112 | 1 | 1070.1190 | 95.00  | 2 | 25.1 | 83.4  | 0 | 139-157 | R.TPEVTCVVVDVSHEDPEVK.F         | Carbamidomethyl: 6                |
| 111 | 1 | 839.5020  | 116.00 | 2 | 24.8 | 84.2  | 0 | 158-171 | K.FNWWYVDGVEVHNAK.T             |                                   |
| 165 | 1 | 603.7300  | 102.12 | 3 | 31.0 | 67.1  | 0 | 185-200 | R.VVSVLTVLHQDWLNGK.E            | Deamidated: 14                    |
| 153 | 1 | 743.8160  | 108.48 | 3 | 29.2 | 83.6  | 1 | 185-203 | R.VVSVLTVLHQDWLNGKEYK.C         | Deamidated: 14                    |
| 81  | 1 | 643.9020  | 95.36  | 2 | 22.2 | 44.2  | 0 | 228-238 | R.EPQVYTLPPSR.D                 |                                   |
| 86  | 2 | 937.0670  | 83.54  | 2 | 22.6 | 39.7  | 1 | 228-243 | R.EPQVYTLPPSRDELTK.N            |                                   |
| 101 | 1 | 581.3890  | 121.36 | 2 | 23.8 | 73.7  | 0 | 244-253 | K.NQVSLTCLVK.G                  | Carbamidomethyl: 7                |
| 158 | 2 | 1272.6020 | 25.68  | 2 | 29.8 | 92.1  | 0 | 254-275 | K.GFYPSDIAVEWESNGQPENNYK.<br>T  |                                   |
| 161 | 2 | 1273.5730 | 401.92 | 2 | 30.2 | 112.1 | 0 | 254-275 | K.GFYPSDIAVEWESNGQPENNYK.<br>T  | Deamidated: 14                    |
| 163 | 2 | 1273.0920 | 24.09  | 2 | 30.6 | 71.1  | 0 | 254-275 | K.GFYPSDIAVEWESNGQPENNYK.<br>T  | Deamidated: 19                    |
| 162 | 1 | 937.5470  | 87.95  | 2 | 30.5 | 63.2  | 0 | 276-292 | K.TTPPVLDSDGSFFLYSK.L           |                                   |
| 98  | 2 | 934.5060  | 84.31  | 3 | 23.6 | 56.7  | 0 | 300-322 | R.WQQGNVFSCSVMHEALHNHYTQK<br>.S | Carbamidomethyl: 9                |
| 77  | 6 | 939.8290  | 74.64  | 3 | 21.9 | 61.8  | 0 | 300-322 | R.WQQGNVFSCSVMHEALHNHYTQK<br>.S | Carbamidomethyl: 9; Oxidation: 12 |

**Protein 2:** Ig kappa chain C region OS=Homo sapiens GN=IGKC PE=1 SV=1

**Accession:** IGKC\_HUMAN

**Database:** SwissProt\_July2013

**Seq. Coverage [%]:** 90.60 %

**Score:** 922.67

**MW [kDa]:** 11.60

**pl:** 5.53

**No. of Peptides:** 12

**Modification(s):** Carbamidomethyl, Deamidated

| Cmpd. | No. of Cmpds. | m/z meas. | $\Delta$ m/z [ppm] | z | Rt [min] | Score | P | Range | Sequence                                      | Modification       |
|-------|---------------|-----------|--------------------|---|----------|-------|---|-------|-----------------------------------------------|--------------------|
| 166   | 2             | 973.6020  | 87.19              | 2 | 31.1     | 39.5  | 0 | 1-18  | .TVAAPSVFIFPPSDEQLK.S                         |                    |
| 174   | 1             | 899.5300  | 87.55              | 2 | 32.2     | 64.6  | 0 | 19-34 | K.SGTASVCLLNIFYPR.E                           | Carbamidomethyl: 8 |
| 92    | 1             | 893.4620  | 43.82              | 3 | 23.2     | 95.3  | 1 | 38-61 | K.VQWKVDNALQSGNSQESVTEQDS<br>K.D              | Deamidated: 13     |
| 83    | 3             | 893.1390  | 49.44              | 3 | 22.4     | 97.2  | 1 | 38-61 | K.VQWKVDNALQSGNSQESVTEQDS<br>K.D              |                    |
| 127   | 1             | 1041.0700 | 59.46              | 4 | 26.8     | 32.1  | 2 | 38-75 | K.VQWKVDNALQSGNSQESVTEQDS<br>KDSTYLSSTLTLSK.A |                    |
| 49    | 2             | 1068.9440 | -33.69             | 2 | 19.1     | 85.8  | 0 | 42-61 | K.VDNALQSGNSQESVTEQDSK.D                      | Deamidated: 3      |



## Accumulated Protein Report

|     |   |           |        |   |      |       |   |       |                                           |                    |
|-----|---|-----------|--------|---|------|-------|---|-------|-------------------------------------------|--------------------|
| 50  | 3 | 1068.9750 | 455.78 | 2 | 19.2 | 126.8 | 0 | 42-61 | K.VDNALQSGNSQESVTEQDSK.D                  |                    |
| 125 | 2 | 1207.2760 | 28.75  | 3 | 26.7 | 129.7 | 1 | 42-75 | K.VDNALQSGNSQESVTEQDSKDST<br>YLSSTLTLSK.A |                    |
| 129 | 1 | 751.9650  | 109.24 | 2 | 27.0 | 113.5 | 0 | 62-75 | K.DSTYLSSTLTLSK.A                         |                    |
| 1   | 1 | 445.7480  | 58.41  | 2 | 14.5 | 27.5  | 1 | 76-82 | K.ADYEKHK.V                               |                    |
| 44  | 1 | 714.4400  | 104.82 | 3 | 18.6 | 107.8 | 1 | 81-99 | K.HKVYACEVTHQGLSSPVTK.S                   | Carbamidomethyl: 6 |
| 60  | 1 | 938.5480  | 86.20  | 2 | 20.4 | 88.8  | 0 | 83-99 | K.VYACEVTHQGLSSPVTK.S                     | Carbamidomethyl: 4 |

**Protein 3:** Ig gamma-4 chain C region OS=Homo sapiens GN=IGHG4 PE=1 SV=1  
**Accession:** IGHG4\_HUMAN **Score:** 643.15  
**Database:** SwissProt\_July2013 **MW [kDa]:** 35.90  
**Seq. Coverage [%]:** 20.50 % **pl:** 7.80  
**No. of Peptides:** 4

**Modification(s):** Carbamidomethyl, Deamidated

| Cmpd. | No. of Cmpds. | m/z meas. | $\Delta$ m/z [ppm] | z | Rt [min] | Score | P | Range   | Sequence                            | Modification          |
|-------|---------------|-----------|--------------------|---|----------|-------|---|---------|-------------------------------------|-----------------------|
| 118   | 1             | 644.3970  | 105.00             | 2 | 25.5     | 53.3  | 0 | 5-16    | K.GPSVFPLAPCSR.S                    | Carbamidomethyl: 10   |
| 94    | 1             | 712.4270  | 96.16              | 2 | 23.3     | 70.5  | 0 | 17-30   | R.STSESTAALGCLVK.D                  | Carbamidomethyl: 11   |
| 3     | 1             | 555.6460  | 92.24              | 3 | 14.7     | 43.3  | 0 | 80-93   | K.TYTCNVDHKPSNTK.V                  | Carbamidomethyl: 4    |
| 172   | 1             | 981.9070  | 84.62              | 3 | 31.8     | 47.5  | 0 | 102-128 | K.YGPPCPSCPAPEFLGGPSVFLFP<br>PKPK.D | Carbamidomethyl: 5, 8 |

**Protein 4:** Ig gamma-2 chain C region OS=Homo sapiens GN=IGHG2 PE=1 SV=2  
**Accession:** IGHG2\_HUMAN **Score:** 626.73  
**Database:** SwissProt\_July2013 **MW [kDa]:** 35.90  
**Seq. Coverage [%]:** 23.90 % **pl:** 8.80  
**No. of Peptides:** 5

**Modification(s):** Carbamidomethyl, Oxidation, Deamidated

| Cmpd. | No. of Cmpds. | m/z meas. | $\Delta$ m/z [ppm] | z | Rt [min] | Score | P | Range   | Sequence                          | Modification                |
|-------|---------------|-----------|--------------------|---|----------|-------|---|---------|-----------------------------------|-----------------------------|
| 154   | 2             | 970.2000  | 63.14              | 3 | 29.3     | 42.6  | 0 | 102-127 | K.CCVECPCPAPPVAGPSVFLFPP<br>KPK.D | Carbamidomethyl: 1, 2, 5, 8 |
| 134   | 1             | 739.1480  | 114.42             | 3 | 27.6     | 100.1 | 1 | 181-199 | R.VVSVLTVVHQDWLNGKEYK.C           | Deamidated: 14              |
| 75    | 1             | 635.7080  | 87.68              | 3 | 21.7     | 35.8  | 1 | 224-239 | R.EPQVYTLPPSREEMTK.N              |                             |
| 66    | 3             | 961.0500  | 80.94              | 2 | 20.8     | 45.2  | 1 | 224-239 | R.EPQVYTLPPSREEMTK.N              | Oxidation: 14               |



## Accumulated Protein Report

|     |   |          |       |   |      |      |   |         |                       |              |
|-----|---|----------|-------|---|------|------|---|---------|-----------------------|--------------|
| 155 | 2 | 961.5010 | 55.08 | 2 | 29.3 | 42.8 | 0 | 272-288 | K.TTPPMLDSDGSFFLYSK.L | Oxidation: 5 |
|-----|---|----------|-------|---|------|------|---|---------|-----------------------|--------------|

**Protein 5:** Ig lambda-3 chain C regions OS=Homo sapiens GN=IGLC3 PE=1 SV=1  
**Accession:** LAC3\_HUMAN **Score:** 389.25  
**Database:** SwissProt\_July2013 **MW [kDa]:** 11.20  
**Seq. Coverage [%]:** 67.90 % **pl:** 7.72  
**Modification(s):** Carbamidomethyl **No. of Peptides:** 6

| Cmpd. | No. of Cmpds. | m/z meas. | $\Delta$ m/z [ppm] | z | Rt [min] | Score | P | Range  | Sequence                  | Modification           |
|-------|---------------|-----------|--------------------|---|----------|-------|---|--------|---------------------------|------------------------|
| 132   | 1             | 993.5770  | 64.86              | 2 | 27.4     | 67.4  | 0 | 5-23   | K.AAPSVTLFPPSSEELQANK.A   |                        |
| 8     | 1             | 495.8100  | 103.38             | 2 | 15.3     | 69.6  | 0 | 51-60  | K.AGVETTTPSK.Q            |                        |
| 123   | 1             | 772.4390  | 74.31              | 3 | 25.7     | 24.0  | 1 | 61-80  | K.QSNNKYAASSYLSLTPEQWK.S  |                        |
| 145   | 1             | 872.5190  | 98.52              | 2 | 28.5     | 67.9  | 0 | 66-80  | K.YAASSYLSLTPEQWK.S       |                        |
| 30    | 1             | 856.4710  | 102.49             | 2 | 17.4     | 109.8 | 0 | 84-98  | K.SYSCQVTHEGSTVEK.T       | Carbamidomethyl: 4     |
| 63    | 1             | 853.0690  | 29.05              | 3 | 20.6     | 50.6  | 1 | 84-106 | K.SYSCQVTHEGSTVEKTVAPTECS | Carbamidomethyl: 4, 22 |
|       |               |           |                    |   |          |       |   |        | -                         |                        |

**Protein 6:** Ig kappa chain V-III region VG (Fragment) OS=Homo sapiens PE=1 SV=1  
**Accession:** KV309\_HUMAN **Score:** 57.62  
**Database:** SwissProt\_July2013 **MW [kDa]:** 12.60  
**Seq. Coverage [%]:** 18.30 % **pl:** 4.69  
**Modification(s):** Carbamidomethyl **No. of Peptides:** 1

| Cmpd. | No. of Cmpds. | m/z meas. | $\Delta$ m/z [ppm] | z | Rt [min] | Score | P | Range | Sequence                  | Modification |
|-------|---------------|-----------|--------------------|---|----------|-------|---|-------|---------------------------|--------------|
| 115   | 1             | 784.8130  | 106.76             | 3 | 25.2     | 57.6  | 0 | 45-65 | R.ASQSVSSYLAWYQQKPGQAPR.L |              |

**Protein 7:** Ig kappa chain V-II region MIL OS=Homo sapiens PE=1 SV=1  
**Accession:** KV203\_HUMAN **Score:** 52.77  
**Database:** SwissProt\_July2013 **MW [kDa]:** 12.00  
**Seq. Coverage [%]:** 17.90 % **pl:** 0.00  
**Modification(s):** Deamidated **No. of Peptides:** 1



## Accumulated Protein Report

| Cmpd. | No. of Cmpds. | m/z meas. | $\Delta$ m/z [ppm] | z | Rt [min] | Score | P | Range | Sequence               | Modification  |
|-------|---------------|-----------|--------------------|---|----------|-------|---|-------|------------------------|---------------|
| 95    | 1             | 662.7000  | 64.96              | 3 | 23.3     | 52.8  | 1 | 59-78 | R.ASGVPNRFSGSGGDTFLK.I | Deamidated: 6 |

**Protein 8:** Ig lambda chain V-IV region MOL OS=Homo sapiens PE=1 SV=1  
**Accession:** LV405\_HUMAN **Score:** 41.60  
**Database:** SwissProt\_July2013 **MW [kDa]:** 11.30  
**Seq. Coverage [%]:** 7.50 % **pl:** 4.28  
**No. of Peptides:** 1

| Cmpd. | No. of Cmpds. | m/z meas. | $\Delta$ m/z [ppm] | z | Rt [min] | Score | P | Range | Sequence     | Modification |
|-------|---------------|-----------|--------------------|---|----------|-------|---|-------|--------------|--------------|
| 13    | 1             | 456.3120  | 121.62             | 2 | 15.6     | 41.6  | 0 | 52-59 | K.RPSGIPER.F |              |

**Search Type:** Combined MS/MS - ProteinExtractor  
**Search Result:** Amazon Human\_SPJuly2013\_2016-08-08 18:23:29  
**Search Location:** /Kathir/ABC 2016 IgG And A1AT/KA IgG ISo Drop 1min E2\_RC4\_01\_8273.d/

**Protein 1:** Ig gamma-1 chain C region OS=Homo sapiens GN=IGHG1 PE=1 SV=1  
**Accession:** IGHG1\_HUMAN **Score:** 1002.58  
**Database:** SwissProt\_July2013 **MW [kDa]:** 36.10  
**Seq. Coverage [%]:** 50.30 % **pl:** 9.36  
**No. of Peptides:** 17

**Modification(s):** Carbamidomethyl, Oxidation, Deamidated

| Cmpd. | No. of Cmpds. | m/z meas. | $\Delta$ m/z [ppm] | z | Rt [min] | Score | P | Range   | Sequence                | Modification        |
|-------|---------------|-----------|--------------------|---|----------|-------|---|---------|-------------------------|---------------------|
| 125   | 1             | 593.8940  | 112.89             | 2 | 24.6     | 57.5  | 0 | 5-16    | K.GPSVFPLAPSSK.S        |                     |
| 101   | 1             | 661.4130  | 106.37             | 2 | 22.5     | 94.9  | 0 | 17-30   | K.STSGGTAALGCLVK.D      | Carbamidomethyl: 11 |
| 133   | 2             | 1070.6220 | 565.08             | 2 | 25.3     | 65.3  | 0 | 139-157 | R.TPEVTCVVVDVSHEDPEVK.F | Carbamidomethyl: 6  |
| 127   | 1             | 839.5070  | 121.96             | 2 | 24.8     | 86.5  | 0 | 158-171 | K.FNWYVDGVEVHNAK.T      |                     |
| 178   | 1             | 743.8210  | 115.21             | 3 | 29.2     | 100.8 | 1 | 185-203 | R.VVSVLTVLHQDWLNGKEYK.C | Deamidated: 14      |

# Accumulated Protein Report



|     |   |           |        |   |      |       |   |         |                                 |                                         |
|-----|---|-----------|--------|---|------|-------|---|---------|---------------------------------|-----------------------------------------|
| 97  | 2 | 643.9010  | 93.81  | 2 | 22.2 | 31.7  | 0 | 228-238 | R.EPQVYTLPPSR.D                 |                                         |
| 103 | 2 | 937.0820  | 99.55  | 2 | 22.7 | 31.3  | 1 | 228-243 | R.EPQVYTLPPSRDELTK.N            |                                         |
| 118 | 1 | 581.3890  | 121.36 | 2 | 23.8 | 79.5  | 0 | 244-253 | K.NQVSLTCLVK.G                  | Carbamidomethyl: 7                      |
| 184 | 4 | 1272.6150 | 35.89  | 2 | 29.8 | 97.5  | 0 | 254-275 | K.GFYPSDIAVEWESNGQPENNYK.<br>T  |                                         |
| 187 | 4 | 1273.5670 | 397.21 | 2 | 30.2 | 107.6 | 0 | 254-275 | K.GFYPSDIAVEWESNGQPENNYK.<br>T  | Deamidated: 14                          |
| 189 | 4 | 1273.1010 | 31.16  | 2 | 30.6 | 80.3  | 0 | 254-275 | K.GFYPSDIAVEWESNGQPENNYK.<br>T  | Deamidated: 16                          |
| 199 | 3 | 1273.6040 | 39.78  | 2 | 32.0 | 47.9  | 0 | 254-275 | K.GFYPSDIAVEWESNGQPENNYK.<br>T  | Deamidated: 14, 19                      |
| 198 | 3 | 1274.0740 | 408.82 | 2 | 31.8 | 40.4  | 0 | 254-275 | K.GFYPSDIAVEWESNGQPENNYK.<br>T  | Deamidated: 16, 20                      |
| 188 | 1 | 937.5580  | 99.68  | 2 | 30.5 | 67.0  | 0 | 276-292 | K.TTPPVLDSGDSFFLYSK.L           |                                         |
| 124 | 1 | 935.4640  | 407.20 | 3 | 24.4 | 31.4  | 0 | 300-322 | R.WQQGNVFSCSVMHEALHNHYTQK<br>.S | Carbamidomethyl: 9;<br>Deamidated: 2, 3 |
| 121 | 2 | 934.5200  | 99.29  | 3 | 24.1 | 57.5  | 0 | 300-322 | R.WQQGNVFSCSVMHEALHNHYTQK<br>.S | Carbamidomethyl: 9                      |
| 89  | 2 | 939.8460  | 92.73  | 3 | 21.5 | 53.8  | 0 | 300-322 | R.WQQGNVFSCSVMHEALHNHYTQK<br>.S | Carbamidomethyl: 9; Oxidation:<br>12    |

**Protein 2:** Ig kappa chain C region OS=Homo sapiens GN=IGKC PE=1 SV=1

**Accession:** IGKC\_HUMAN **Score:** 743.69

**Database:** SwissProt\_July2013 **MW [kDa]:** 11.60

**Seq. Coverage [%]:** 90.60 % **pl:** 5.53

**No. of Peptides:** 11

**Modification(s):** Carbamidomethyl, Deamidated

| Cmpd. | No. of Cmpds. | m/z meas. | $\Delta$ m/z [ppm] | z | Rt [min] | Score | P | Range | Sequence                         | Modification       |
|-------|---------------|-----------|--------------------|---|----------|-------|---|-------|----------------------------------|--------------------|
| 190   | 1             | 973.6160  | 101.57             | 2 | 30.9     | 96.5  | 0 | 1-18  | -TVAAPSVFIFPPSDEQLK.S            |                    |
| 200   | 1             | 899.5380  | 96.44              | 2 | 32.2     | 63.8  | 0 | 19-34 | K.SGTASVCLLNIFYPR.E              | Carbamidomethyl: 8 |
| 100   | 1             | 893.1300  | 39.36              | 3 | 22.5     | 88.7  | 1 | 38-61 | K.VQWKVDNALQSGNSQESVTEQDS<br>K.D |                    |
| 70    | 3             | 1068.5240 | 33.69              | 2 | 19.2     | 129.0 | 0 | 42-61 | K.VDNALQSGNSQESVTEQDSK.D         |                    |
| 69    | 1             | 1068.9470 | -30.88             | 2 | 19.1     | 82.4  | 0 | 42-61 | K.VDNALQSGNSQESVTEQDSK.D         | Deamidated: 3      |
| 132   | 1             | 1069.6170 | 135.57             | 2 | 25.2     | 20.1  | 0 | 42-61 | K.VDNALQSGNSQESVTEQDSK.D         | Deamidated: 3, 9   |
| 147   | 1             | 1207.6090 | 32.88              | 3 | 26.8     | 108.3 | 1 | 42-75 | K.VDNALQSGNSQESVTEQDSK.DST       | Deamidated: 3      |

## Accumulated Protein Report



|     |   |           |        |   |      |       |   |       |                                            |                    |
|-----|---|-----------|--------|---|------|-------|---|-------|--------------------------------------------|--------------------|
|     |   |           |        |   |      |       |   |       | YLSLSTLTLSK.A                              |                    |
| 135 | 3 | 1207.2680 | 22.12  | 3 | 25.6 | 133.1 | 1 | 42-75 | K.VDNALQSGNSQESVTEQDSKDST<br>YLSLSTLTLSK.A |                    |
| 15  | 1 | 445.7830  | 136.93 | 2 | 14.4 | 26.0  | 1 | 76-82 | K.ADYEKHK.V                                |                    |
| 67  | 1 | 1071.1460 | 95.20  | 2 | 18.6 | 109.8 | 1 | 81-99 | K.HKVYACEVTHQGLSSPVTK.S                    | Carbamidomethyl: 6 |
| 82  | 1 | 626.0340  | 85.48  | 3 | 20.4 | 76.8  | 0 | 83-99 | K.VYACEVTHQGLSSPVTK.S                      | Carbamidomethyl: 4 |

**Protein 3:** Ig gamma-4 chain C region OS=Homo sapiens GN=IGHG4 PE=1 SV=1  
**Accession:** IGHG4\_HUMAN **Score:** 702.89  
**Database:** SwissProt\_July2013 **MW [kDa]:** 35.90  
**Seq. Coverage [%]:** 20.50 % **pI:** 7.80  
**No. of Peptides:** 4

**Modification(s):** Carbamidomethyl, Deamidated

| Cmpd. | No. of Cmpds. | m/z meas. | $\Delta$ m/z [ppm] | z | Rt [min] | Score | P | Range   | Sequence                            | Modification          |
|-------|---------------|-----------|--------------------|---|----------|-------|---|---------|-------------------------------------|-----------------------|
| 134   | 1             | 644.4010  | 111.20             | 2 | 25.5     | 58.3  | 0 | 5-16    | K.GPSVFPLAPCSR.S                    | Carbamidomethyl: 10   |
| 110   | 1             | 712.4370  | 110.20             | 2 | 23.2     | 78.8  | 0 | 17-30   | R.STSESTAALGCLVK.D                  | Carbamidomethyl: 11   |
| 20    | 1             | 832.9660  | 93.07              | 2 | 14.7     | 61.9  | 0 | 80-93   | K.TYTCNVDPKPSNTK.V                  | Carbamidomethyl: 4    |
| 195   | 1             | 981.9210  | 98.88              | 3 | 31.6     | 46.8  | 0 | 102-128 | K.YGPPCPSCPAPEFLGGPSVFLFP<br>PKPK.D | Carbamidomethyl: 5, 8 |

**Protein 4:** Ig gamma-2 chain C region OS=Homo sapiens GN=IGHG2 PE=1 SV=2  
**Accession:** IGHG2\_HUMAN **Score:** 597.58  
**Database:** SwissProt\_July2013 **MW [kDa]:** 35.90  
**Seq. Coverage [%]:** 18.10 % **pI:** 8.80  
**No. of Peptides:** 4

**Modification(s):** Carbamidomethyl, Oxidation, Deamidated

| Cmpd. | No. of Cmpds. | m/z meas. | $\Delta$ m/z [ppm] | z | Rt [min] | Score | P | Range   | Sequence                          | Modification                |
|-------|---------------|-----------|--------------------|---|----------|-------|---|---------|-----------------------------------|-----------------------------|
| 180   | 4             | 970.2340  | 98.19              | 3 | 29.3     | 66.7  | 0 | 102-127 | K.CCVECPCPAPPVAGPSVFLFPP<br>KPK.D | Carbamidomethyl: 1, 2, 5, 8 |
| 79    | 2             | 961.0510  | 81.98              | 2 | 20.3     | 53.6  | 1 | 224-239 | R.EPQVYTLPPSREEMTK.N              | Oxidation: 14               |
| 94    | 1             | 953.0650  | 94.69              | 2 | 21.8     | 35.0  | 1 | 224-239 | R.EPQVYTLPPSREEMTK.N              |                             |
| 182   | 2             | 962.0350  | 610.49             | 2 | 29.6     | 51.6  | 0 | 272-288 | K.TTPMLDSDGSFFLYSK.L              | Oxidation: 5                |





## Accumulated Protein Report

**Protein 5:** Ig lambda-3 chain C regions OS=Homo sapiens GN=IGLC3 PE=1 SV=1  
**Accession:** LAC3\_HUMAN **Score:** 380.95  
**Database:** SwissProt\_July2013 **MW [kDa]:** 11.20  
**Seq. Coverage [%]:** 63.20 % **pI:** 7.72  
**No. of Peptides:** 5

**Modification(s):** Carbamidomethyl

| Cmpd. | No. of Cmpds. | m/z meas. | $\Delta$ m/z [ppm] | z | Rt [min] | Score | P | Range  | Sequence                  | Modification           |
|-------|---------------|-----------|--------------------|---|----------|-------|---|--------|---------------------------|------------------------|
| 156   | 2             | 993.6020  | 90.02              | 2 | 27.4     | 84.4  | 0 | 5-23   | K.AAPSVTLFPPSSEELQANK.A   |                        |
| 26    | 1             | 495.8110  | 105.40             | 2 | 15.3     | 59.9  | 0 | 51-60  | K.AGVETTTPSK.Q            |                        |
| 171   | 1             | 872.5250  | 105.39             | 2 | 28.5     | 94.7  | 0 | 66-80  | K.YAASSYLSLTPEQWK.S       |                        |
| 45    | 1             | 856.4460  | 73.29              | 2 | 16.8     | 103.5 | 0 | 84-98  | K.SYSCQVTHEGSTVEK.T       | Carbamidomethyl: 4     |
| 83    | 1             | 853.0690  | 29.05              | 3 | 20.7     | 38.5  | 1 | 84-106 | K.SYSCQVTHEGSTVEKTVAPTECS | Carbamidomethyl: 4, 22 |

**Protein 6:** Immunoglobulin lambda-like polypeptide 5 OS=Homo sapiens GN=IGLL5 PE=2 SV=2  
**Accession:** IGLL5\_HUMAN **Score:** 358.85  
**Database:** SwissProt\_July2013 **MW [kDa]:** 23.00  
**Seq. Coverage [%]:** 13.60 % **pI:** 10.03  
**No. of Peptides:** 2

**Modification(s):** Carbamidomethyl

| Cmpd. | No. of Cmpds. | m/z meas. | $\Delta$ m/z [ppm] | z | Rt [min] | Score | P | Range   | Sequence                | Modification |
|-------|---------------|-----------|--------------------|---|----------|-------|---|---------|-------------------------|--------------|
| 155   | 1             | 1022.1010 | 76.03              | 2 | 27.3     | 64.4  | 0 | 113-131 | K.ANPTVTLFPPSSEELQANK.A |              |
| 18    | 1             | 509.3450  | 122.94             | 2 | 14.5     | 57.7  | 0 | 159-168 | K.AGVETTKPSK.Q          |              |

**Protein 7:** Ig kappa chain V-II region MIL OS=Homo sapiens PE=1 SV=1  
**Accession:** KV203\_HUMAN **Score:** 64.46  
**Database:** SwissProt\_July2013 **MW [kDa]:** 12.00  
**Seq. Coverage [%]:** 17.90 % **pI:** 0.00  
**No. of Peptides:** 1

**Modification(s):** Deamidated



## Accumulated Protein Report

| Cmpd. | No. of Cmpds. | m/z meas. | $\Delta$ m/z [ppm] | z | Rt [min] | Score | P | Range | Sequence                 | Modification  |
|-------|---------------|-----------|--------------------|---|----------|-------|---|-------|--------------------------|---------------|
| 112   | 1             | 662.7170  | 90.61              | 3 | 23.3     | 64.5  | 1 | 59-78 | R.ASGVPNRFSGSGSGTDFTLK.I | Deamidated: 6 |

**Protein 8:** Ig lambda chain V-IV region MOL OS=Homo sapiens PE=1 SV=1  
**Accession:** LV405\_HUMAN **Score:** 37.28  
**Database:** SwissProt\_July2013 **MW [kDa]:** 11.30  
**Seq. Coverage [%]:** 7.50 % **pl:** 4.28  
**No. of Peptides:** 1

| Cmpd. | No. of Cmpds. | m/z meas. | $\Delta$ m/z [ppm] | z | Rt [min] | Score | P | Range | Sequence     | Modification |
|-------|---------------|-----------|--------------------|---|----------|-------|---|-------|--------------|--------------|
| 32    | 1             | 456.3200  | 139.16             | 2 | 15.6     | 37.3  | 0 | 52-59 | K.RPSGIPER.F |              |

**Search Type:** Combined MS/MS - ProteinExtractor  
**Search Result:** Amazon Human\_SPJuly2013\_2016-08-08 18:23:29  
**Search Location:** /Kathir/ABC 2016 IgG And A1AT/KA IgG ISo Drop 1min E2\_RC4\_01\_8298.d/

**Protein 1:** Ig gamma-1 chain C region OS=Homo sapiens GN=IGHG1 PE=1 SV=1  
**Accession:** IGHG1\_HUMAN **Score:** 1081.01  
**Database:** SwissProt\_July2013 **MW [kDa]:** 36.10  
**Seq. Coverage [%]:** 53.60 % **pl:** 9.36  
**No. of Peptides:** 16

**Modification(s):** Carbamidomethyl, Oxidation, Deamidated

| Cmpd. | No. of Cmpds. | m/z meas. | $\Delta$ m/z [ppm] | z | Rt [min] | Score | P | Range   | Sequence                            | Modification              |
|-------|---------------|-----------|--------------------|---|----------|-------|---|---------|-------------------------------------|---------------------------|
| 107   | 1             | 593.8990  | 121.31             | 2 | 24.6     | 69.2  | 0 | 5-16    | K.GPSVFPLAPSSK.S                    |                           |
| 86    | 1             | 661.4110  | 103.35             | 2 | 22.6     | 101.5 | 0 | 17-30   | K.STSGGTAALGCLVK.D                  | Carbamidomethyl: 11       |
| 131   | 2             | 1112.5700 | 315.68             | 3 | 27.7     | 81.6  | 1 | 102-131 | K.SCDKTHTCPPCPAPPELLGGPSVFLFPPKPK.D | Carbamidomethyl: 2, 8, 11 |
| 144   | 2             | 948.9210  | 102.20             | 3 | 28.7     | 66.1  | 0 | 106-131 | K.THTCPPCPAPPELLGGPSVFLFPPKPK.D     | Carbamidomethyl: 4, 7     |

# Accumulated Protein Report



|     |   |           |        |   |      |       |   |         |                                 |                                   |
|-----|---|-----------|--------|---|------|-------|---|---------|---------------------------------|-----------------------------------|
| 111 | 1 | 1070.1140 | 90.32  | 2 | 25.2 | 103.8 | 0 | 139-157 | R.TPEVTCVVVDVSHEDPEVK.F         | Carbamidomethyl: 6                |
| 109 | 1 | 839.5080  | 123.15 | 2 | 24.8 | 85.5  | 0 | 158-171 | K.FNWWYVDGVEVHNAK.T             |                                   |
| 88  | 1 | 937.0620  | 78.20  | 2 | 22.7 | 34.1  | 1 | 228-243 | R.EPQVYTLPPSRDELTK.N            |                                   |
| 100 | 1 | 581.4030  | 145.45 | 2 | 23.8 | 71.6  | 0 | 244-253 | K.NQVSLTCLVK.G                  | Carbamidomethyl: 7                |
| 153 | 4 | 1272.6070 | 29.61  | 2 | 29.8 | 93.1  | 0 | 254-275 | K.GFYPSDIAVEWESNGQPENNYK.<br>T  |                                   |
| 157 | 7 | 1273.5860 | 412.13 | 2 | 30.2 | 102.3 | 0 | 254-275 | K.GFYPSDIAVEWESNGQPENNYK.<br>T  | Deamidated: 14                    |
| 165 | 7 | 1273.0750 | 10.74  | 2 | 31.5 | 90.7  | 0 | 254-275 | K.GFYPSDIAVEWESNGQPENNYK.<br>T  | Deamidated: 16                    |
| 161 | 4 | 1273.5900 | 28.78  | 2 | 30.8 | 93.2  | 0 | 254-275 | K.GFYPSDIAVEWESNGQPENNYK.<br>T  | Deamidated: 14, 20                |
| 160 | 4 | 1273.5840 | 24.07  | 2 | 30.7 | 105.6 | 0 | 254-275 | K.GFYPSDIAVEWESNGQPENNYK.<br>T  | Deamidated: 14, 19                |
| 158 | 1 | 937.5470  | 87.95  | 2 | 30.5 | 72.0  | 0 | 276-292 | K.TTPPVLDSDGSFFLYSK.L           |                                   |
| 69  | 2 | 939.8430  | 89.53  | 3 | 21.3 | 40.2  | 0 | 300-322 | R.WQQGNVFSCSVMHEALHNHYTQK<br>.S | Carbamidomethyl: 9; Oxidation: 12 |
| 97  | 1 | 934.5160  | 95.01  | 3 | 23.6 | 54.5  | 0 | 300-322 | R.WQQGNVFSCSVMHEALHNHYTQK<br>.S | Carbamidomethyl: 9                |

**Protein 2:** Ig kappa chain C region OS=Homo sapiens GN=IGKC PE=1 SV=1

**Accession:** IGKC\_HUMAN **Score:** 774.49  
**Database:** SwissProt\_July2013 **MW [kDa]:** 11.60  
**Seq. Coverage [%]:** 85.80 % **pI:** 5.53  
**No. of Peptides:** 9

**Modification(s):** Carbamidomethyl

| Cmpd. | No. of Cmpds. | m/z meas. | Δ m/z [ppm] | z | Rt [min] | Score | P | Range | Sequence                                      | Modification       |
|-------|---------------|-----------|-------------|---|----------|-------|---|-------|-----------------------------------------------|--------------------|
| 164   | 1             | 973.5990  | 84.11       | 2 | 31.0     | 68.9  | 0 | 1-18  | -TVAAPSVFIFPPSDEQLK.S                         |                    |
| 168   | 1             | 899.5390  | 97.56       | 2 | 32.3     | 60.0  | 0 | 19-34 | K.SGTASVVCLLNFPYR.E                           | Carbamidomethyl: 8 |
| 85    | 1             | 893.1290  | 38.24       | 3 | 22.5     | 78.4  | 1 | 38-61 | K.VQWKVDNALQSGNSQESVTEQDS<br>K.D              |                    |
| 121   | 1             | 1041.0690 | 58.49       | 4 | 26.9     | 23.9  | 2 | 38-75 | K.VQWKVDNALQSGNSQESVTEQDS<br>KDSTYLSSTLTLSK.A |                    |
| 50    | 2             | 1068.5440 | 52.41       | 2 | 19.2     | 129.6 | 0 | 42-61 | K.VDNALQSGNSQESVTEQDSK.D                      |                    |
| 119   | 2             | 1207.2720 | 25.43       | 3 | 26.8     | 126.3 | 1 | 42-75 | K.VDNALQSGNSQESVTEQDSKDST<br>YLSSTLTLSK.A     |                    |



## Accumulated Protein Report

|     |   |           |        |   |      |       |   |       |                         |                    |
|-----|---|-----------|--------|---|------|-------|---|-------|-------------------------|--------------------|
| 124 | 1 | 751.9520  | 91.95  | 2 | 27.1 | 77.9  | 0 | 62-75 | K.DSTYLSSTLTLSK.A       |                    |
| 40  | 2 | 1071.1610 | 109.20 | 2 | 18.4 | 105.4 | 1 | 81-99 | K.HKVYACEVTHQGLSSPVTK.S | Carbamidomethyl: 6 |
| 60  | 1 | 938.5530  | 91.53  | 2 | 20.4 | 88.7  | 0 | 83-99 | K.VYACEVTHQGLSSPVTK.S   | Carbamidomethyl: 4 |

**Protein 3:** Ig gamma-4 chain C region OS=Homo sapiens GN=IGHG4 PE=1 SV=1  
**Accession:** IGHG4\_HUMAN **Score:** 592.00  
**Database:** SwissProt\_July2013 **MW [kDa]:** 35.90  
**Seq. Coverage [%]:** 20.50 % **pl:** 7.80  
**No. of Peptides:** 4

**Modification(s):** Carbamidomethyl, Deamidated

| Cmpd. | No. of Cmpds. | m/z meas. | $\Delta$ m/z [ppm] | z | Rt [min] | Score | P | Range   | Sequence                            | Modification          |
|-------|---------------|-----------|--------------------|---|----------|-------|---|---------|-------------------------------------|-----------------------|
| 113   | 1             | 644.4090  | 123.62             | 2 | 25.5     | 56.5  | 0 | 5-16    | K.GPSVFPLAPCSR.S                    | Carbamidomethyl: 10   |
| 94    | 1             | 712.4250  | 93.35              | 2 | 23.3     | 67.9  | 0 | 17-30   | R.STSESTAALGCLVK.D                  | Carbamidomethyl: 11   |
| 2     | 1             | 555.6480  | 95.84              | 3 | 14.7     | 40.8  | 0 | 80-93   | K.TYTCNVDHKPSNTK.V                  | Carbamidomethyl: 4    |
| 167   | 1             | 981.8990  | 76.47              | 3 | 31.8     | 54.2  | 0 | 102-128 | K.YGPPCPSCPAPEFLGGPSVFLFP<br>PKPK.D | Carbamidomethyl: 5, 8 |

**Protein 4:** Ig gamma-2 chain C region OS=Homo sapiens GN=IGHG2 PE=1 SV=2  
**Accession:** IGHG2\_HUMAN **Score:** 530.65  
**Database:** SwissProt\_July2013 **MW [kDa]:** 35.90  
**Seq. Coverage [%]:** 18.40 % **pl:** 8.80  
**No. of Peptides:** 5

**Modification(s):** Carbamidomethyl, Oxidation, Deamidated

| Cmpd. | No. of Cmpds. | m/z meas. | $\Delta$ m/z [ppm] | z | Rt [min] | Score | P | Range   | Sequence                            | Modification                |
|-------|---------------|-----------|--------------------|---|----------|-------|---|---------|-------------------------------------|-----------------------------|
| 122   | 1             | 759.9490  | 91.31              | 4 | 27.0     | 27.1  | 1 | 101-127 | R.KCCVECPPCPAPPVAGPSVFLFP<br>PKPK.D | Carbamidomethyl: 2, 3, 6, 9 |
| 149   | 3             | 970.5080  | 380.62             | 3 | 29.2     | 54.4  | 0 | 102-127 | K.CCVECPPCPAPPVAGPSVFLFP<br>KPK.D   | Carbamidomethyl: 1, 2, 5, 8 |
| 59    | 4             | 961.0600  | 91.35              | 2 | 20.2     | 50.5  | 1 | 224-239 | R.EPQVYTLPPSREEMTK.N                | Oxidation: 14               |
| 78    | 1             | 953.0500  | 78.95              | 2 | 21.9     | 44.8  | 1 | 224-239 | R.EPQVYTLPPSREEMTK.N                |                             |
| 151   | 1             | 961.5180  | 72.76              | 2 | 29.5     | 43.5  | 0 | 272-288 | K.TTPPMLDSDGSFFLYSK.L               | Oxidation: 5                |

**Protein 5:** Ig lambda-3 chain C regions OS=Homo sapiens GN=IGLC3 PE=1 SV=1



## Accumulated Protein Report

**Accession:** LAC3\_HUMAN **Score:** 327.71  
**Database:** SwissProt\_July2013 **MW [kDa]:** 11.20  
**Seq. Coverage [%]:** 60.40 % **pl:** 7.72  
**No. of Peptides:** 5

**Modification(s):** Carbamidomethyl

| Cmpd. | No. of Cmpds. | m/z meas. | $\Delta$ m/z [ppm] | z | Rt [min] | Score | P | Range | Sequence                 | Modification       |
|-------|---------------|-----------|--------------------|---|----------|-------|---|-------|--------------------------|--------------------|
| 126   | 1             | 993.5730  | 60.83              | 2 | 27.3     | 75.3  | 0 | 5-23  | K.AAPSVTLFPPSSEELQANK.A  |                    |
| 9     | 1             | 495.8120  | 107.42             | 2 | 15.4     | 81.9  | 0 | 51-60 | K.AGVETTPSK.Q            |                    |
| 116   | 1             | 772.4520  | 91.14              | 3 | 25.8     | 45.6  | 1 | 61-80 | K.QSNNKYAASSYLSLTPEQWK.S |                    |
| 142   | 1             | 872.5100  | 88.20              | 2 | 28.5     | 53.1  | 0 | 66-80 | K.YAASSYLSLTPEQWK.S      |                    |
| 23    | 2             | 856.4860  | 120.00             | 2 | 16.8     | 71.8  | 0 | 84-98 | K.SYSCQVTHEGSTVEK.T      | Carbamidomethyl: 4 |

**Protein 6:** Ig kappa chain V-II region MIL OS=Homo sapiens PE=1 SV=1  
**Accession:** KV203\_HUMAN **Score:** 56.75  
**Database:** SwissProt\_July2013 **MW [kDa]:** 12.00  
**Seq. Coverage [%]:** 17.90 % **pl:** 0.00  
**No. of Peptides:** 1

**Modification(s):** Deamidated

| Cmpd. | No. of Cmpds. | m/z meas. | $\Delta$ m/z [ppm] | z | Rt [min] | Score | P | Range | Sequence               | Modification  |
|-------|---------------|-----------|--------------------|---|----------|-------|---|-------|------------------------|---------------|
| 95    | 1             | 662.7050  | 72.50              | 3 | 23.3     | 56.8  | 1 | 59-78 | R.ASGVPNRFSGSGGDTFLK.I | Deamidated: 6 |

**Search Type:** Combined MS/MS - ProteinExtractor  
**Search Result:** Amazon Human\_SPJuly2013\_2016-08-08 18:23:29  
**Search Location:** /Kathir/ABC 2016 IgG And A1AT/KA IgG I So Drop 1min E3\_RC5\_01\_8274.d/

**Protein 1:** Ig gamma-1 chain C region OS=Homo sapiens GN=IGHG1 PE=1 SV=1  
**Accession:** IGHG1\_HUMAN **Score:** 1244.02  
**Database:** SwissProt\_July2013 **MW [kDa]:** 36.10  
**Seq. Coverage [%]:** 54.50 % **pl:** 9.36

# Accumulated Protein Report



No. of Peptides: 18

Modification(s): Carbamidomethyl, Oxidation, Deamidated

| Cmpd. | No. of Cmpds. | m/z meas. | Δ m/z [ppm] | z | Rt [min] | Score | P | Range   | Sequence                         | Modification                          |
|-------|---------------|-----------|-------------|---|----------|-------|---|---------|----------------------------------|---------------------------------------|
| 126   | 1             | 593.8890  | 104.47      | 2 | 24.6     | 72.2  | 0 | 5-16    | K.GPSVFPLAPSSK.S                 |                                       |
| 99    | 1             | 661.4090  | 100.32      | 2 | 22.5     | 95.9  | 0 | 17-30   | K.STSGGTAALGCLVK.D               | Carbamidomethyl: 11                   |
| 65    | 1             | 426.2730  | 128.57      | 2 | 19.3     | 44.6  | 0 | 132-138 | K.DTLMISR.T                      | Oxidation: 4                          |
| 132   | 1             | 714.0750  | 552.54      | 3 | 25.2     | 80.3  | 0 | 139-157 | R.TPEVTCVVVDVSHEDPEVK.F          | Carbamidomethyl: 6                    |
| 128   | 1             | 839.5100  | 125.53      | 2 | 24.8     | 94.8  | 0 | 158-171 | K.FNWWYVDGVEVHNAK.T              |                                       |
| 180   | 1             | 743.8050  | 93.69       | 3 | 29.3     | 96.0  | 1 | 185-203 | R.VVSVLTVLHQDWLNGKEYK.C          | Deamidated: 14                        |
| 95    | 2             | 643.9020  | 95.36       | 2 | 22.2     | 41.1  | 0 | 228-238 | R.EPQVYTLPPSR.D                  |                                       |
| 101   | 2             | 937.0740  | 91.01       | 2 | 22.8     | 50.9  | 1 | 228-243 | R.EPQVYTLPPSRDELTK.N             |                                       |
| 116   | 1             | 581.3930  | 128.25      | 2 | 23.7     | 76.3  | 0 | 244-253 | K.NQVSLTCLVK.G                   | Carbamidomethyl: 7                    |
| 186   | 4             | 1273.5630 | 394.06      | 2 | 30.3     | 118.2 | 0 | 254-275 | K.GFYPSDIAVEWESNGQPENNYK.<br>T   | Deamidated: 14                        |
| 188   | 4             | 1273.1010 | 31.16       | 2 | 30.7     | 68.1  | 0 | 254-275 | K.GFYPSDIAVEWESNGQPENNYK.<br>T   | Deamidated: 19                        |
| 189   | 3             | 1273.5940 | 31.93       | 2 | 30.7     | 96.0  | 0 | 254-275 | K.GFYPSDIAVEWESNGQPENNYK.<br>T   | Deamidated: 14, 19                    |
| 184   | 2             | 1272.6190 | 39.04       | 2 | 29.8     | 100.4 | 0 | 254-275 | K.GFYPSDIAVEWESNGQPENNYK.<br>T   |                                       |
| 187   | 1             | 937.5590  | 100.75      | 2 | 30.5     | 80.6  | 0 | 276-292 | K.TTPPVLDSDGSFFLYSK.L            |                                       |
| 16    | 1             | 409.7980  | 141.16      | 2 | 14.7     | 26.1  | 1 | 293-299 | K.LTVDKSR.W                      |                                       |
| 114   | 2             | 934.5100  | 88.59       | 3 | 23.6     | 87.1  | 0 | 300-322 | R.WQQGNVFSCSV MHEALHNHYTQK<br>.S | Carbamidomethyl: 9                    |
| 118   | 1             | 934.8350  | 85.34       | 3 | 24.0     | 31.3  | 0 | 300-322 | R.WQQGNVFSCSV MHEALHNHYTQK<br>.S | Carbamidomethyl: 9;<br>Deamidated: 18 |
| 80    | 2             | 939.8360  | 82.08       | 3 | 21.3     | 52.3  | 0 | 300-322 | R.WQQGNVFSCSV MHEALHNHYTQK<br>.S | Carbamidomethyl: 9; Oxidation:<br>12  |

Protein 2: Ig kappa chain C region OS=Homo sapiens GN=IGKC PE=1 SV=1

Accession: IGKC\_HUMAN Score: 832.44

Database: SwissProt\_July2013 MW [kDa]: 11.60

Seq. Coverage [%]: 97.20 % pI: 5.53

No. of Peptides: 9

Modification(s): Carbamidomethyl, Deamidated



## Accumulated Protein Report

| Cmpd. | No. of Cmpds. | m/z meas. | $\Delta$ m/z [ppm] | z | Rt [min] | Score | P | Range   | Sequence                                   | Modification       |
|-------|---------------|-----------|--------------------|---|----------|-------|---|---------|--------------------------------------------|--------------------|
| 190   | 1             | 973.6160  | 101.57             | 2 | 31.0     | 80.4  | 0 | 1-18    | -TVAAPSVFIFPPSDEQLK.S                      |                    |
| 196   | 1             | 899.5470  | 106.45             | 2 | 32.2     | 66.1  | 0 | 19-34   | K.SGTASVVCLLNNFYPR.E                       | Carbamidomethyl: 8 |
| 98    | 1             | 893.1270  | 36.00              | 3 | 22.5     | 102.0 | 1 | 38-61   | K.VQWKVDNALQSGNSQESVTEQDS<br>K.D           |                    |
| 63    | 3             | 1068.9150 | 399.63             | 2 | 19.0     | 138.6 | 0 | 42-61   | K.VDNALQSGNSQESVTEQDSK.D                   |                    |
| 147   | 1             | 1207.6040 | 28.74              | 3 | 26.8     | 111.3 | 1 | 42-75   | K.VDNALQSGNSQESVTEQDSKSDST<br>YLSSTLTLSK.A | Deamidated: 3      |
| 11    | 1             | 445.7960  | 166.10             | 2 | 14.4     | 32.9  | 1 | 76-82   | K.ADYEKHK.V                                |                    |
| 60    | 1             | 714.4340  | 96.42              | 3 | 18.7     | 107.9 | 1 | 81-99   | K.HKVYACEVTHQGLSSPVTK.S                    | Carbamidomethyl: 6 |
| 76    | 1             | 938.5470  | 85.14              | 2 | 20.4     | 78.3  | 0 | 83-99   | K.VYACEVTHQGLSSPVTK.S                      | Carbamidomethyl: 4 |
| 19    | 1             | 435.2500  | 155.91             | 2 | 15.1     | 27.3  | 1 | 100-106 | K.SFNRGEC.-                                | Carbamidomethyl: 7 |

**Protein 3:** Ig gamma-2 chain C region OS=Homo sapiens GN=IGHG2 PE=1 SV=2  
**Accession:** IGHG2\_HUMAN **Score:** 778.42  
**Database:** SwissProt\_July2013 **MW [kDa]:** 35.90  
**Seq. Coverage [%]:** 31.90 % **pI:** 8.80  
**No. of Peptides:** 7

**Modification(s):** Carbamidomethyl, Oxidation, Deamidated

| Cmpd. | No. of Cmpds. | m/z meas. | $\Delta$ m/z [ppm] | z | Rt [min] | Score | P | Range   | Sequence                          | Modification                |
|-------|---------------|-----------|--------------------|---|----------|-------|---|---------|-----------------------------------|-----------------------------|
| 133   | 1             | 644.4160  | 134.48             | 2 | 25.5     | 61.1  | 0 | 5-16    | K.GPSVFPLAPCSR.S                  | Carbamidomethyl: 10         |
| 109   | 1             | 712.4260  | 94.76              | 2 | 23.3     | 83.0  | 0 | 17-30   | R.STSESTAALGCLVK.D                | Carbamidomethyl: 11         |
| 179   | 5             | 970.2280  | 92.00              | 3 | 29.3     | 57.9  | 0 | 102-127 | K.CCVCPPCPAPPVAGPSVFLFPP<br>KPK.D | Carbamidomethyl: 1, 2, 5, 8 |
| 155   | 1             | 739.1500  | 117.13             | 3 | 27.5     | 78.6  | 1 | 181-199 | R.VVSVLTVVHQDWLNGKEYK.C           | Deamidated: 14              |
| 92    | 1             | 635.7020  | 78.24              | 3 | 21.9     | 46.1  | 1 | 224-239 | R.EPQVYTLPPSREEMTK.N              |                             |
| 73    | 2             | 961.0400  | 70.54              | 2 | 20.3     | 44.3  | 1 | 224-239 | R.EPQVYTLPPSREEMTK.N              | Oxidation: 14               |
| 178   | 1             | 961.5300  | 85.24              | 2 | 29.2     | 48.6  | 0 | 272-288 | K.TTPPMLDSDGSFFLYSK.L             | Oxidation: 5                |

**Protein 4:** Ig gamma-4 chain C region OS=Homo sapiens GN=IGHG4 PE=1 SV=1  
**Accession:** IGHG4\_HUMAN **Score:** 763.61  
**Database:** SwissProt\_July2013 **MW [kDa]:** 35.90  
**Seq. Coverage [%]:** 4.30 % **pI:** 7.80  
**No. of Peptides:** 1



## Accumulated Protein Report

**Modification(s):** Carbamidomethyl, Oxidation, Deamidated

| Cmpd. | No. of Cmpds. | m/z meas. | $\Delta$ m/z [ppm] | z | Rt [min] | Score | P | Range | Sequence           | Modification       |
|-------|---------------|-----------|--------------------|---|----------|-------|---|-------|--------------------|--------------------|
| 17    | 1             | 832.9670  | 94.27              | 2 | 14.7     | 43.4  | 0 | 80-93 | K.TYTCNVDHKPSNTK.V | Carbamidomethyl: 4 |

**Protein 5:** Ig gamma-3 chain C region OS=Homo sapiens GN=IGHG3 PE=1 SV=2  
**Accession:** IGHG3\_HUMAN **Score:** 576.10  
**Database:** SwissProt\_July2013 **MW [kDa]:** 41.30  
**Seq. Coverage [%]:** 3.20 % **pI:** 9.41  
**No. of Peptides:** 1

**Modification(s):** Carbamidomethyl, Oxidation, Deamidated

| Cmpd. | No. of Cmpds. | m/z meas. | $\Delta$ m/z [ppm] | z | Rt [min] | Score | P | Range   | Sequence         | Modification |
|-------|---------------|-----------|--------------------|---|----------|-------|---|---------|------------------|--------------|
| 89    | 1             | 472.9580  | 118.99             | 3 | 21.7     | 44.6  | 0 | 207-218 | K.WYVDGVEVHNAK.T |              |

**Protein 6:** Ig lambda-3 chain C regions OS=Homo sapiens GN=IGLC3 PE=1 SV=1  
**Accession:** LAC3\_HUMAN **Score:** 382.25  
**Database:** SwissProt\_July2013 **MW [kDa]:** 11.20  
**Seq. Coverage [%]:** 60.40 % **pI:** 7.72  
**No. of Peptides:** 5

**Modification(s):** Carbamidomethyl

| Cmpd. | No. of Cmpds. | m/z meas. | $\Delta$ m/z [ppm] | z | Rt [min] | Score | P | Range | Sequence                 | Modification       |
|-------|---------------|-----------|--------------------|---|----------|-------|---|-------|--------------------------|--------------------|
| 154   | 3             | 993.6010  | 89.02              | 2 | 27.4     | 79.0  | 0 | 5-23  | K.AAPSVTLFPPSSEELQANK.A  |                    |
| 23    | 1             | 495.8120  | 107.42             | 2 | 15.5     | 69.6  | 0 | 51-60 | K.AGVETTTPSK.Q           |                    |
| 136   | 2             | 772.4730  | 118.33             | 3 | 25.7     | 49.7  | 1 | 61-80 | K.QSNNKYAASSYLSLTPEQWK.S |                    |
| 170   | 1             | 872.5290  | 109.98             | 2 | 28.5     | 98.3  | 0 | 66-80 | K.YAASSYLSLTPEQWK.S      |                    |
| 43    | 2             | 856.4710  | 102.49             | 2 | 17.3     | 85.8  | 0 | 84-98 | K.SYSCQVTHEGSTVEK.T      | Carbamidomethyl: 4 |

**Protein 7:** Ig lambda-1 chain C regions OS=Homo sapiens GN=IGLC1 PE=1 SV=1  
**Accession:** LAC1\_HUMAN **Score:** 370.79  
**Database:** SwissProt\_July2013 **MW [kDa]:** 11.30  
**Seq. Coverage [%]:** 27.40 % **pI:** 9.16





## Accumulated Protein Report

No. of Peptides: 2

Modification(s): Carbamidomethyl

| Cmpd. | No. of Cmpds. | m/z meas. | $\Delta$ m/z [ppm] | z | Rt [min] | Score | P | Range | Sequence                | Modification |
|-------|---------------|-----------|--------------------|---|----------|-------|---|-------|-------------------------|--------------|
| 153   | 1             | 1022.1000 | 75.05              | 2 | 27.3     | 76.6  | 0 | 5-23  | K.ANPTVTLFPPSSEELQANK.A |              |
| 14    | 1             | 509.3510  | 134.72             | 2 | 14.6     | 60.4  | 0 | 51-60 | K.AGVETTKPSK.Q          |              |

**Protein 8:** Ig heavy chain V-III region TEI OS=Homo sapiens PE=1 SV=1  
**Accession:** HV316\_HUMAN **Score:** 110.60  
**Database:** SwissProt\_July2013 **MW [kDa]:** 12.80  
**Seq. Coverage [%]:** 16.00 % **pI:** 9.57  
**No. of Peptides:** 1

| Cmpd. | No. of Cmpds. | m/z meas. | $\Delta$ m/z [ppm] | z | Rt [min] | Score | P | Range | Sequence               | Modification |
|-------|---------------|-----------|--------------------|---|----------|-------|---|-------|------------------------|--------------|
| 141   | 1             | 941.5910  | 91.27              | 2 | 26.4     | 110.6 | 0 | 1-19  | -EVQLVESGGGLVQPGGSLR.L |              |

**Search Type:** Combined MS/MS - ProteinExtractor  
**Search Result:** Amazon Human\_SPJuly2013\_2016-08-08 18:23:29  
**Search Location:** /Kathir/ABC 2016 IgG And A1AT/KA IgG ACN Drop 1min E3\_RA3\_01\_8262.d/

**Protein 1:** Ig gamma-1 chain C region OS=Homo sapiens GN=IGHG1 PE=1 SV=1  
**Accession:** IGHG1\_HUMAN **Score:** 934.19  
**Database:** SwissProt\_July2013 **MW [kDa]:** 36.10  
**Seq. Coverage [%]:** 53.60 % **pI:** 9.36  
**No. of Peptides:** 14

Modification(s): Carbamidomethyl, Deamidated

| Cmpd. | No. of Cmpds. | m/z meas. | $\Delta$ m/z [ppm] | z | Rt [min] | Score | P | Range | Sequence         | Modification |
|-------|---------------|-----------|--------------------|---|----------|-------|---|-------|------------------|--------------|
| 144   | 1             | 593.8690  | 70.79              | 2 | 24.6     | 84.8  | 0 | 5-16  | K.GPSVFPLAPSSK.S |              |



## Accumulated Protein Report

|     |   |           |        |   |      |       |   |         |                                         |                           |
|-----|---|-----------|--------|---|------|-------|---|---------|-----------------------------------------|---------------------------|
| 127 | 1 | 661.3930  | 76.13  | 2 | 22.5 | 89.2  | 0 | 17-30   | K.STSGGTAALGCLVK.D                      | Carbamidomethyl: 11       |
| 166 | 2 | 1112.3030 | 75.62  | 3 | 27.7 | 62.7  | 1 | 102-131 | K.SCDKTHTCPPCPAPPELLGGPSVF<br>LFPPKPK.D | Carbamidomethyl: 2, 8, 11 |
| 173 | 1 | 948.9210  | 102.20 | 3 | 28.7 | 58.6  | 0 | 106-131 | K.THTCPPCPAPPELLGGPSVFLFPP<br>KPK.D     | Carbamidomethyl: 4, 7     |
| 150 | 1 | 713.7270  | 64.93  | 3 | 25.1 | 52.8  | 0 | 139-157 | R.TPEVTCVVVDVSHEDPEVK.F                 | Carbamidomethyl: 6        |
| 146 | 1 | 839.4730  | 81.45  | 2 | 24.8 | 90.9  | 0 | 158-171 | K.FNWYVDGVEVHNAK.T                      |                           |
| 124 | 2 | 643.8970  | 87.60  | 2 | 22.3 | 33.5  | 0 | 228-238 | R.EPQVYTLPPSR.D                         |                           |
| 130 | 1 | 937.0590  | 75.00  | 2 | 22.8 | 38.9  | 1 | 228-243 | R.EPQVYTLPPSRDELTK.N                    |                           |
| 139 | 1 | 581.3920  | 126.53 | 2 | 23.7 | 76.4  | 0 | 244-253 | K.NQVSLTCLVK.G                          | Carbamidomethyl: 7        |
| 181 | 3 | 1272.5830 | 10.75  | 2 | 29.7 | 94.8  | 0 | 254-275 | K.GFYPSDIAVEWESNGQPENNYK.<br>T          |                           |
| 182 | 2 | 1273.0790 | 13.88  | 2 | 30.1 | 118.1 | 0 | 254-275 | K.GFYPSDIAVEWESNGQPENNYK.<br>T          | Deamidated: 14            |
| 184 | 2 | 1273.0570 | -3.40  | 2 | 30.6 | 72.3  | 0 | 254-275 | K.GFYPSDIAVEWESNGQPENNYK.<br>T          | Deamidated: 19            |
| 183 | 1 | 937.5390  | 79.42  | 2 | 30.4 | 75.2  | 0 | 276-292 | K.TTPPVLDSDGSFFLYSK.L                   |                           |
| 135 | 1 | 934.5030  | 81.10  | 3 | 23.4 | 58.3  | 0 | 300-322 | R.WQQGNVFCSCVMHEALHNHYTQK<br>.S         | Carbamidomethyl: 9        |

**Protein 2:** Ig kappa chain C region OS=Homo sapiens GN=IGKC PE=1 SV=1  
**Accession:** IGKC\_HUMAN **Score:** 727.49  
**Database:** SwissProt\_July2013 **MW [kDa]:** 11.60  
**Seq. Coverage [%]:** 75.50 % **pl:** 5.53  
**No. of Peptides:** 9

**Modification(s):** Carbamidomethyl, Deamidated

| Cmpd. | No. of Cmpds. | m/z meas. | $\Delta$ m/z [ppm] | z | Rt [min] | Score | P | Range | Sequence                         | Modification             |
|-------|---------------|-----------|--------------------|---|----------|-------|---|-------|----------------------------------|--------------------------|
| 185   | 1             | 973.5920  | 76.92              | 2 | 30.9     | 72.6  | 0 | 1-18  | -.TVAAPSVFIFPPSDEQLK.S           |                          |
| 125   | 1             | 893.1320  | 41.60              | 3 | 22.4     | 93.1  | 1 | 38-61 | K.VQWKVDNALQSGNSQESVTEQDS<br>K.D |                          |
| 120   | 2             | 894.4760  | 77.29              | 3 | 21.8     | 33.6  | 1 | 38-61 | K.VQWKVDNALQSGNSQESVTEQDS<br>K.D | Deamidated: 2, 7, 13, 15 |
| 121   | 2             | 894.4670  | 434.12             | 3 | 21.9     | 59.5  | 1 | 38-61 | K.VQWKVDNALQSGNSQESVTEQDS<br>K.D | Deamidated: 2, 7, 10     |
| 95    | 3             | 1068.5650 | 72.06              | 2 | 19.2     | 123.4 | 0 | 42-61 | K.VDNALQSGNSQESVTEQDSK.D         |                          |
| 156   | 2             | 1207.5610 | 264.82             | 3 | 26.1     | 140.1 | 1 | 42-75 | K.VDNALQSGNSQESVTEQDSKDST        |                          |



## Accumulated Protein Report

|     |   |           |       |   |      |       |   |       | YSLSSTLTLSK.A           |                    |
|-----|---|-----------|-------|---|------|-------|---|-------|-------------------------|--------------------|
| 34  | 1 | 445.7580  | 80.84 | 2 | 14.4 | 31.7  | 1 | 76-82 | K.ADYEKHK.V             |                    |
| 85  | 1 | 1071.1490 | 98.00 | 2 | 18.2 | 124.6 | 1 | 81-99 | K.HKVYACEVTHQGLSSPVTK.S | Carbamidomethyl: 6 |
| 105 | 1 | 938.5510  | 89.40 | 2 | 20.4 | 82.5  | 0 | 83-99 | K.VYACEVTHQGLSSPVTK.S   | Carbamidomethyl: 4 |

**Protein 3:** Ig gamma-2 chain C region OS=Homo sapiens GN=IGHG2 PE=1 SV=2  
**Accession:** IGHG2\_HUMAN **Score:** 487.14  
**Database:** SwissProt\_July2013 **MW [kDa]:** 35.90  
**Seq. Coverage [%]:** 26.40 % **pl:** 8.80  
**No. of Peptides:** 7

**Modification(s):** Carbamidomethyl, Oxidation

| Cmpd. | No. of Cmpds. | m/z meas. | Δ m/z [ppm] | z | Rt [min] | Score | P | Range   | Sequence                           | Modification                |
|-------|---------------|-----------|-------------|---|----------|-------|---|---------|------------------------------------|-----------------------------|
| 152   | 1             | 644.3920  | 97.24       | 2 | 25.4     | 59.9  | 0 | 5-16    | K.GPSVFPLAPCSR.S                   | Carbamidomethyl: 10         |
| 133   | 1             | 712.4230  | 90.55       | 2 | 23.2     | 77.6  | 0 | 17-30   | R.STSESTAALGCLVK.D                 | Carbamidomethyl: 11         |
| 160   | 1             | 759.9420  | 82.09       | 4 | 27.0     | 21.7  | 1 | 101-127 | R.KCCVECPCPAPPVAGPSVFLFP<br>PKPK.D | Carbamidomethyl: 2, 3, 6, 9 |
| 177   | 2             | 970.2200  | 83.76       | 3 | 29.2     | 61.0  | 0 | 102-127 | K.CCVECPCPAPPVAGPSVFLFP<br>KPK.D   | Carbamidomethyl: 1, 2, 5, 8 |
| 107   | 2             | 961.0480  | 78.86       | 2 | 20.6     | 35.0  | 1 | 224-239 | R.EPQVYTLPPSREEMTK.N               | Oxidation: 14               |
| 119   | 1             | 953.0550  | 84.20       | 2 | 21.7     | 30.7  | 1 | 224-239 | R.EPQVYTLPPSREEMTK.N               |                             |
| 179   | 1             | 961.5180  | 72.76       | 2 | 29.4     | 33.0  | 0 | 272-288 | K.TTTPMLDSDGSFFLYSK.L              | Oxidation: 5                |

**Protein 4:** Ig lambda-2 chain C regions OS=Homo sapiens GN=IGLC2 PE=1 SV=1  
**Accession:** LAC2\_HUMAN **Score:** 381.10  
**Database:** SwissProt\_July2013 **MW [kDa]:** 11.30  
**Seq. Coverage [%]:** 62.30 % **pl:** 7.73  
**No. of Peptides:** 5

**Modification(s):** Carbamidomethyl

| Cmpd. | No. of Cmpds. | m/z meas. | Δ m/z [ppm] | z | Rt [min] | Score | P | Range | Sequence                | Modification |
|-------|---------------|-----------|-------------|---|----------|-------|---|-------|-------------------------|--------------|
| 163   | 1             | 993.5850  | 72.91       | 2 | 27.3     | 91.3  | 0 | 5-23  | K.AAPSVTLFPPSSEELQANK.A |              |
| 73    | 1             | 838.0020  | 84.88       | 2 | 17.3     | 43.5  | 1 | 44-60 | K.ADSSPVKAGVETTTPSK.Q   |              |
| 47    | 1             | 495.8050  | 93.30       | 2 | 15.3     | 67.4  | 0 | 51-60 | K.AGVETTTPSK.Q          |              |
| 170   | 1             | 872.5080  | 85.91       | 2 | 28.4     | 105.9 | 0 | 66-80 | K.YAASSYLSLTPEQWK.S     |              |



## Accumulated Protein Report

|    |   |          |       |   |      |      |   |       |                     |                    |
|----|---|----------|-------|---|------|------|---|-------|---------------------|--------------------|
| 67 | 1 | 856.4460 | 73.29 | 2 | 16.7 | 72.9 | 0 | 84-98 | R.SYSCQVTHEGSTVEK.T | Carbamidomethyl: 4 |
|----|---|----------|-------|---|------|------|---|-------|---------------------|--------------------|

**Protein 5:** Ig gamma-3 chain C region OS=Homo sapiens GN=IGHG3 PE=1 SV=2  
**Accession:** IGHG3\_HUMAN **Score:** 375.71  
**Database:** SwissProt\_July2013 **MW [kDa]:** 41.30  
**Seq. Coverage [%]:** 2.70 % **pI:** 9.41  
**No. of Peptides:** 1  
**Modification(s):** Carbamidomethyl, Oxidation

| Cmpd. | No. of Cmpds. | m/z meas. | $\Delta$ m/z [ppm] | z | Rt [min] | Score | P | Range   | Sequence       | Modification          |
|-------|---------------|-----------|--------------------|---|----------|-------|---|---------|----------------|-----------------------|
| 64    | 1             | 593.8060  | 89.91              | 2 | 16.5     | 51.0  | 0 | 119-128 | K.SCDTPPPCPR.C | Carbamidomethyl: 2, 8 |

**Protein 6:** Ig lambda-1 chain C regions OS=Homo sapiens GN=IGLC1 PE=1 SV=1  
**Accession:** LAC1\_HUMAN **Score:** 311.14  
**Database:** SwissProt\_July2013 **MW [kDa]:** 11.30  
**Seq. Coverage [%]:** 27.40 % **pI:** 9.16  
**No. of Peptides:** 2  
**Modification(s):** Carbamidomethyl

| Cmpd. | No. of Cmpds. | m/z meas. | $\Delta$ m/z [ppm] | z | Rt [min] | Score | P | Range | Sequence                | Modification |
|-------|---------------|-----------|--------------------|---|----------|-------|---|-------|-------------------------|--------------|
| 162   | 1             | 1022.0740 | 49.61              | 2 | 27.2     | 72.1  | 0 | 5-23  | K.ANPTVTLFPPSSEELQANK.A |              |
| 37    | 1             | 509.3410  | 115.09             | 2 | 14.5     | 60.2  | 0 | 51-60 | K.AGVETTKPSK.Q          |              |

**Protein 7:** Ig lambda chain V-IV region HI1 OS=Homo sapiens PE=1 SV=1  
**Accession:** LV403\_HUMAN **Score:** 89.57  
**Database:** SwissProt\_July2013 **MW [kDa]:** 11.50  
**Seq. Coverage [%]:** 17.80 % **pI:** 6.93  
**No. of Peptides:** 1

| Cmpd. | No. of Cmpds. | m/z meas. | $\Delta$ m/z [ppm] | z | Rt [min] | Score | P | Range | Sequence                | Modification |
|-------|---------------|-----------|--------------------|---|----------|-------|---|-------|-------------------------|--------------|
| 143   | 1             | 1002.5330 | 27.66              | 2 | 24.6     | 89.6  | 0 | 1-19  | -.SYELTQPPSVSVSPGQTAR.I |              |



## Accumulated Protein Report

**Protein 8:** Ig kappa chain V-III region NG9 (Fragment) OS=Homo sapiens PE=1 SV=1  
**Accession:** KV303\_HUMAN **Score:** 73.15  
**Database:** SwissProt\_July2013 **MW [kDa]:** 10.70  
**Seq. Coverage [%]:** 22.00 % **pI:** 7.08  
**No. of Peptides:** 1

| Cmpd. | No. of Cmpds. | m/z meas. | $\Delta$ m/z [ppm] | z | Rt [min] | Score | P | Range | Sequence                       | Modification |
|-------|---------------|-----------|--------------------|---|----------|-------|---|-------|--------------------------------|--------------|
| 140   | 1             | 813.7830  | 52.96              | 3 | 24.0     | 73.2  | 0 | 29-50 | R.ASQSVSSSYLAWYQQKPGQAPR.<br>L |              |

**Protein 9:** Ig heavy chain V-III region HIL OS=Homo sapiens PE=1 SV=1  
**Accession:** HV310\_HUMAN **Score:** 53.08  
**Database:** SwissProt\_July2013 **MW [kDa]:** 13.60  
**Seq. Coverage [%]:** 13.20 % **pI:** 9.93  
**No. of Peptides:** 1

| Cmpd. | No. of Cmpds. | m/z meas. | $\Delta$ m/z [ppm] | z | Rt [min] | Score | P | Range | Sequence            | Modification |
|-------|---------------|-----------|--------------------|---|----------|-------|---|-------|---------------------|--------------|
| 169   | 1             | 796.9920  | 33.64              | 2 | 28.4     | 53.1  | 1 | 1-16  | -QVKLVQAGGGVVQPGR.S |              |
